# Supplementary material for: Gold(I)-catalyzed 6-endo hydroxycyclization of 7-substituted-1,6-enynes
Source: PubMed Central journal article supplement (PMC3817472; doi:10.3762/bjoc.9.263), 2013-10-29

# Supporting Information

for

## **Gold(I)-catalyzed 6-*endo* hydroxycyclization of 7-substituted-1,6-enynes**

Ana M. Sanjuán, Alberto Martínez, Patricia García-García, Manuel A. Fernández-Rodríguez and Roberto Sanz\*

Address: Área de Química Orgánica, Departamento de Química, Facultad de Ciencias, Universidad de Burgos, Pza. Misael Bañuelos s/n, 09001 Burgos, Spain

Email: Roberto Sanz - [rsd@ubu.es](mailto:rsd@ubu.es)

\* Corresponding author

### **NMR spectra**

## **$^1\text{H}$ and $^{13}\text{C}$ NMR spectra**

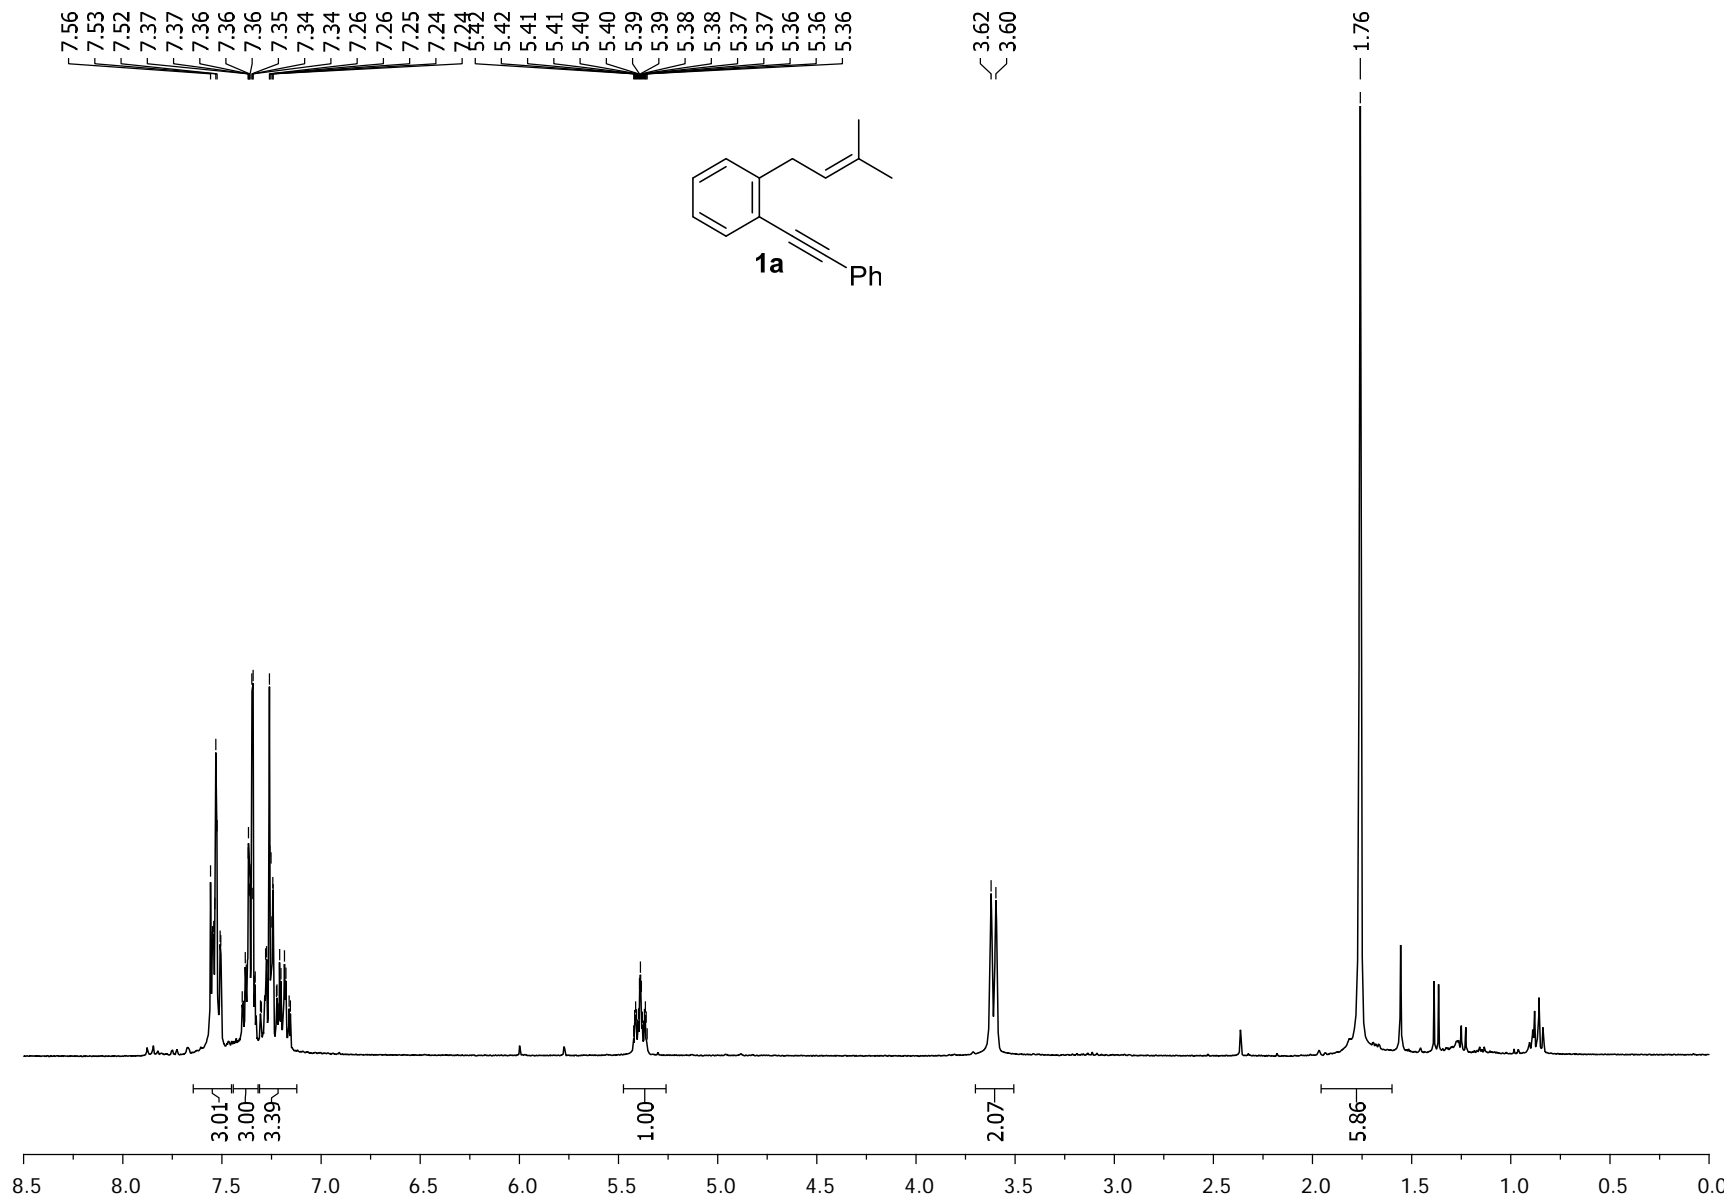

— 143.8  
— 133.0  
— 132.3  
— 131.6  
— 128.6  
— 128.6  
— 128.5  
— 128.3  
— 125.8  
— 123.7  
— 122.6  
— 122.6

— 93.3  
— 88.5

— 33.2  
— 25.9  
— 18.1

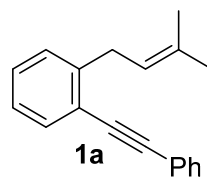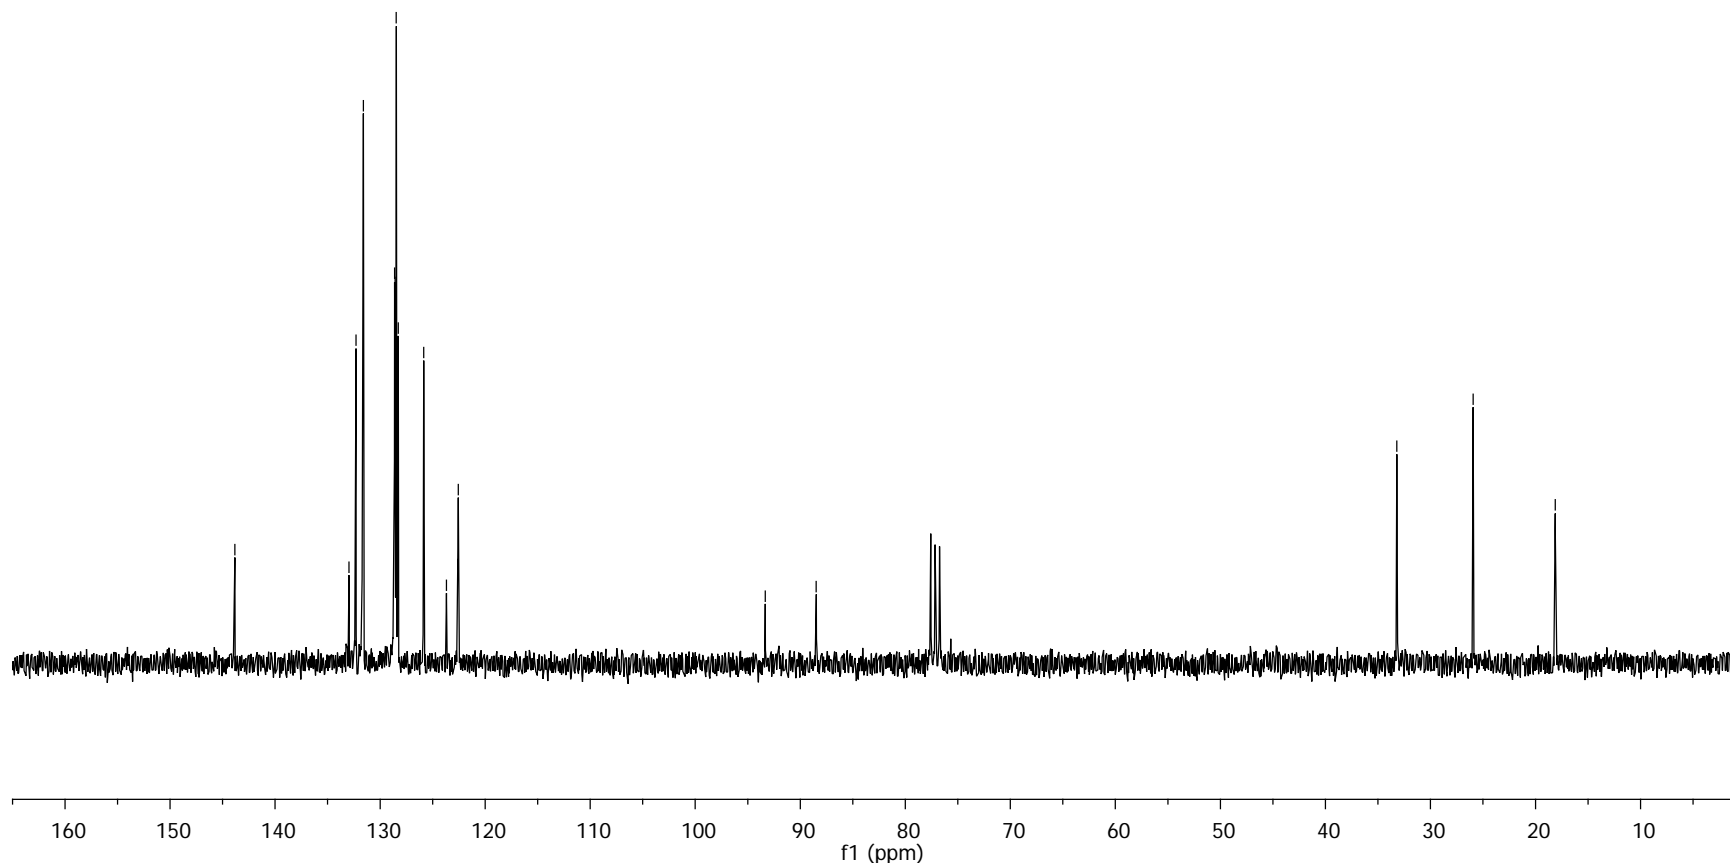

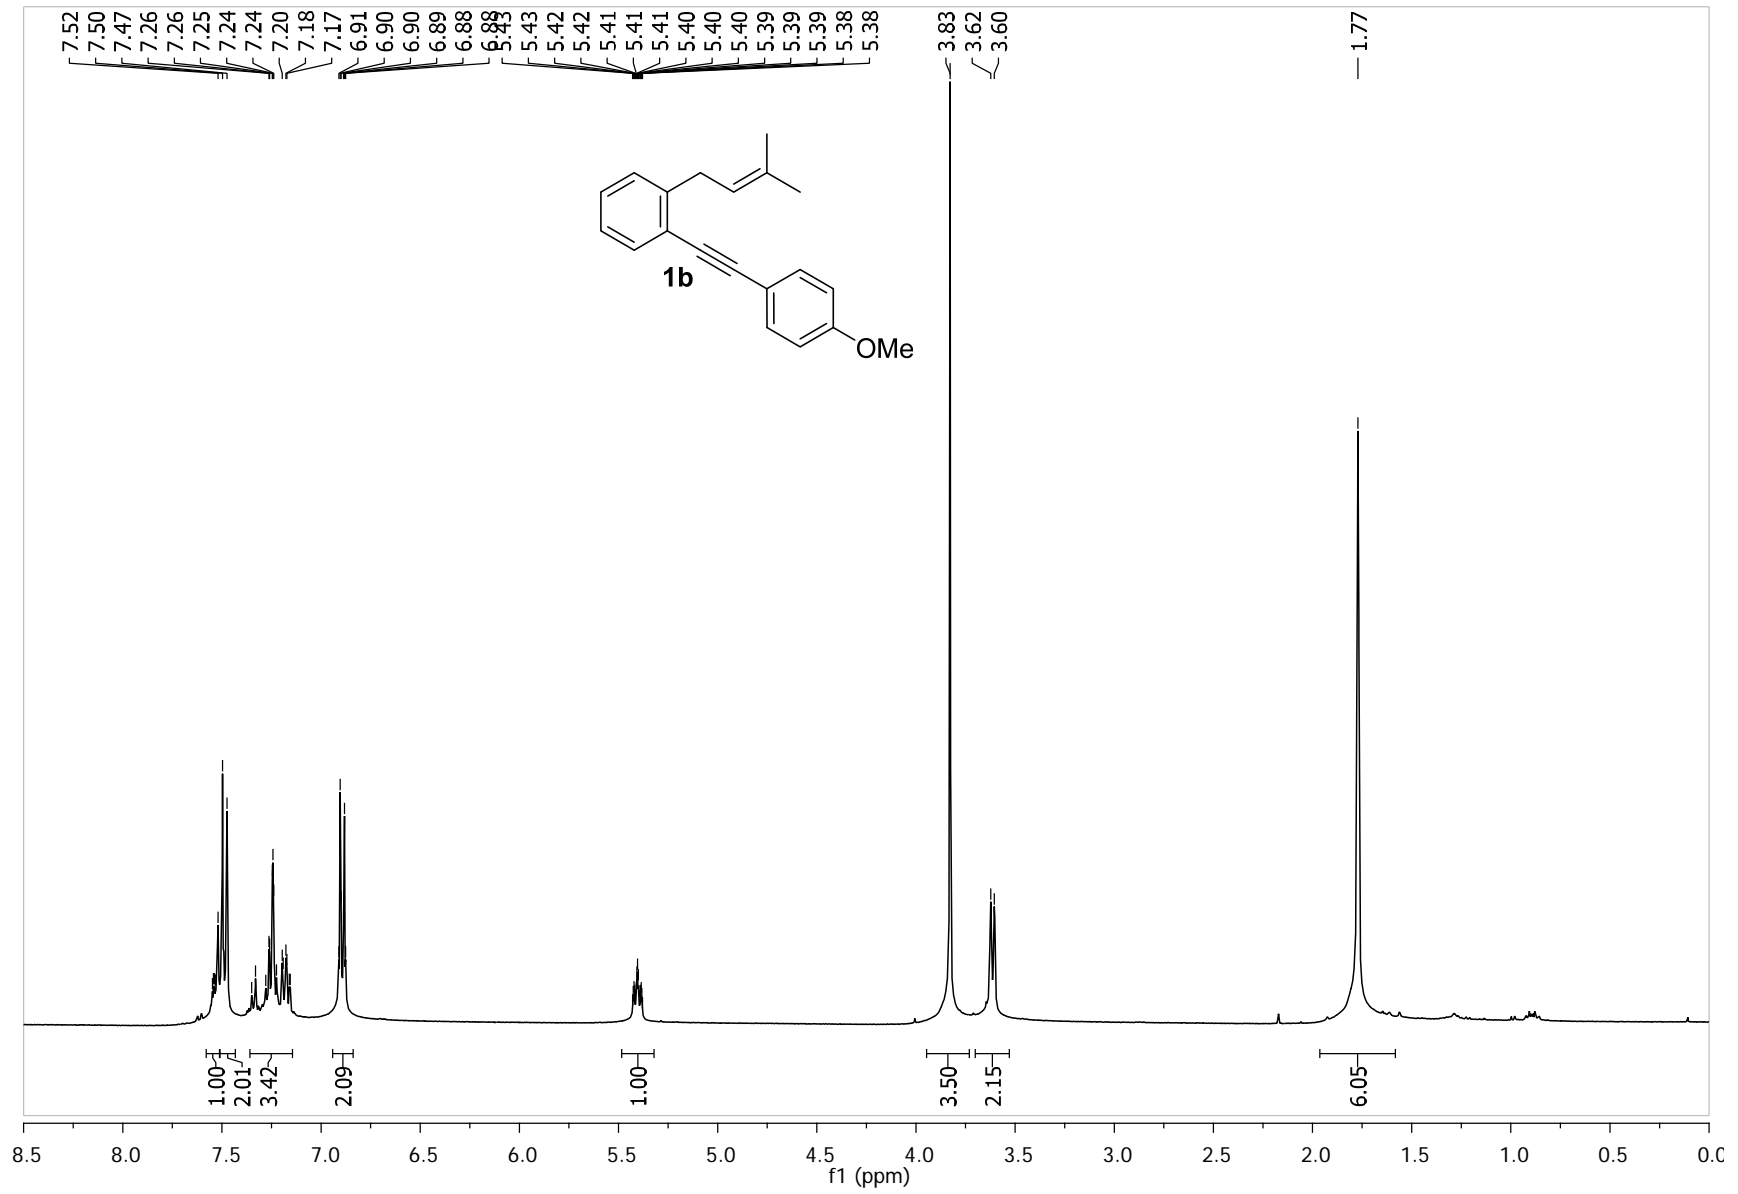

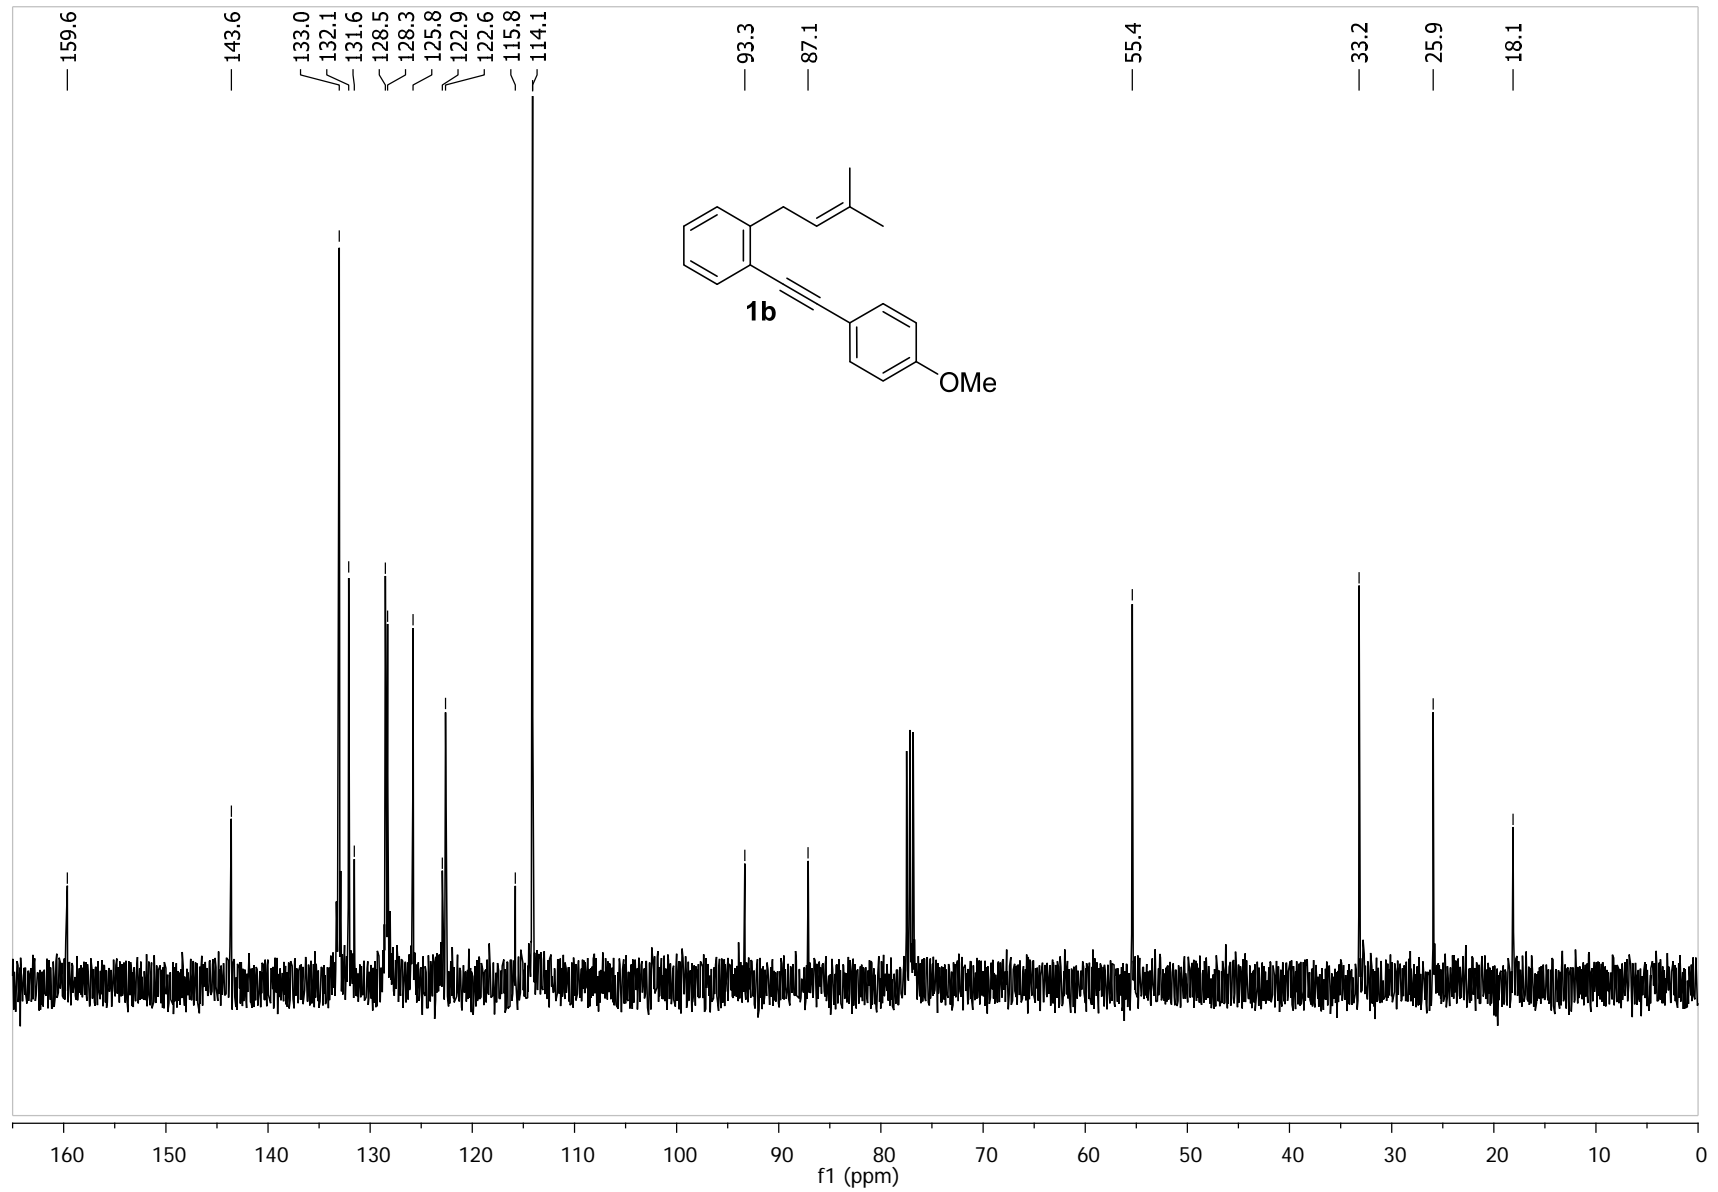

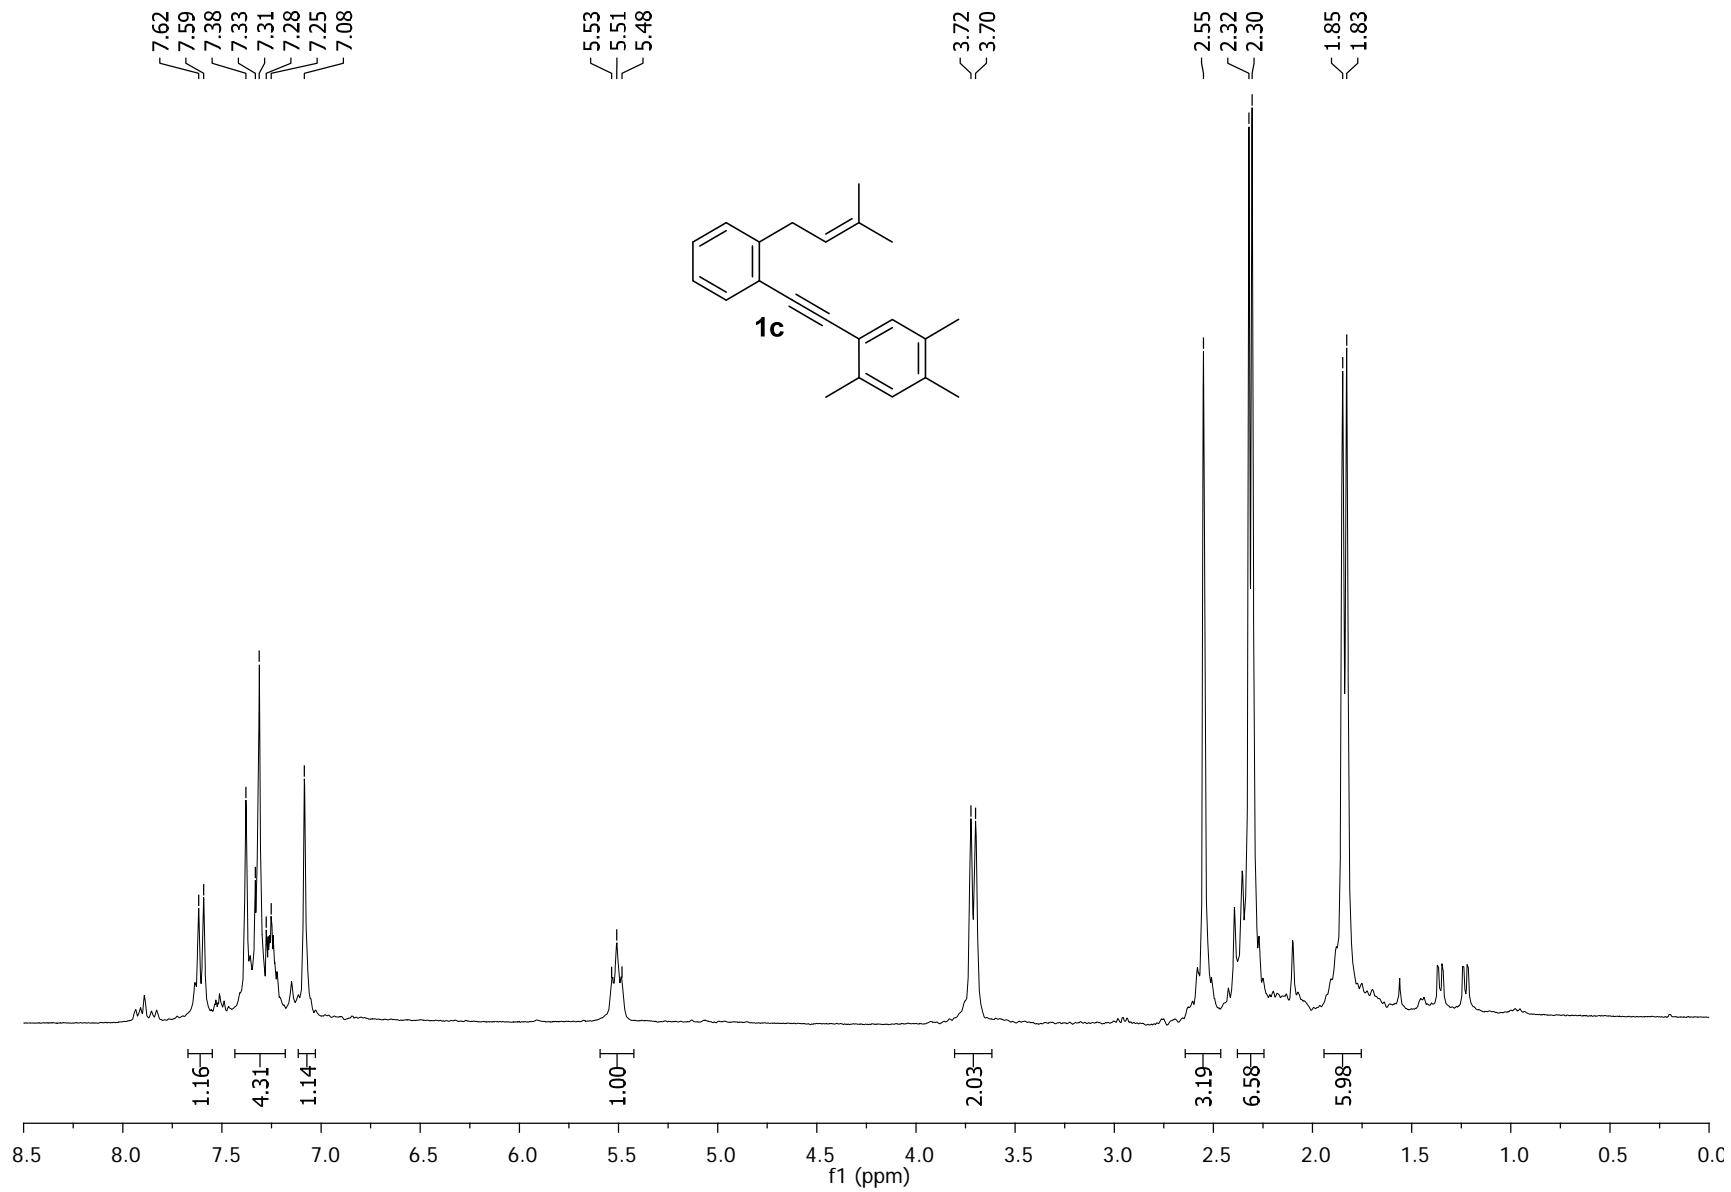

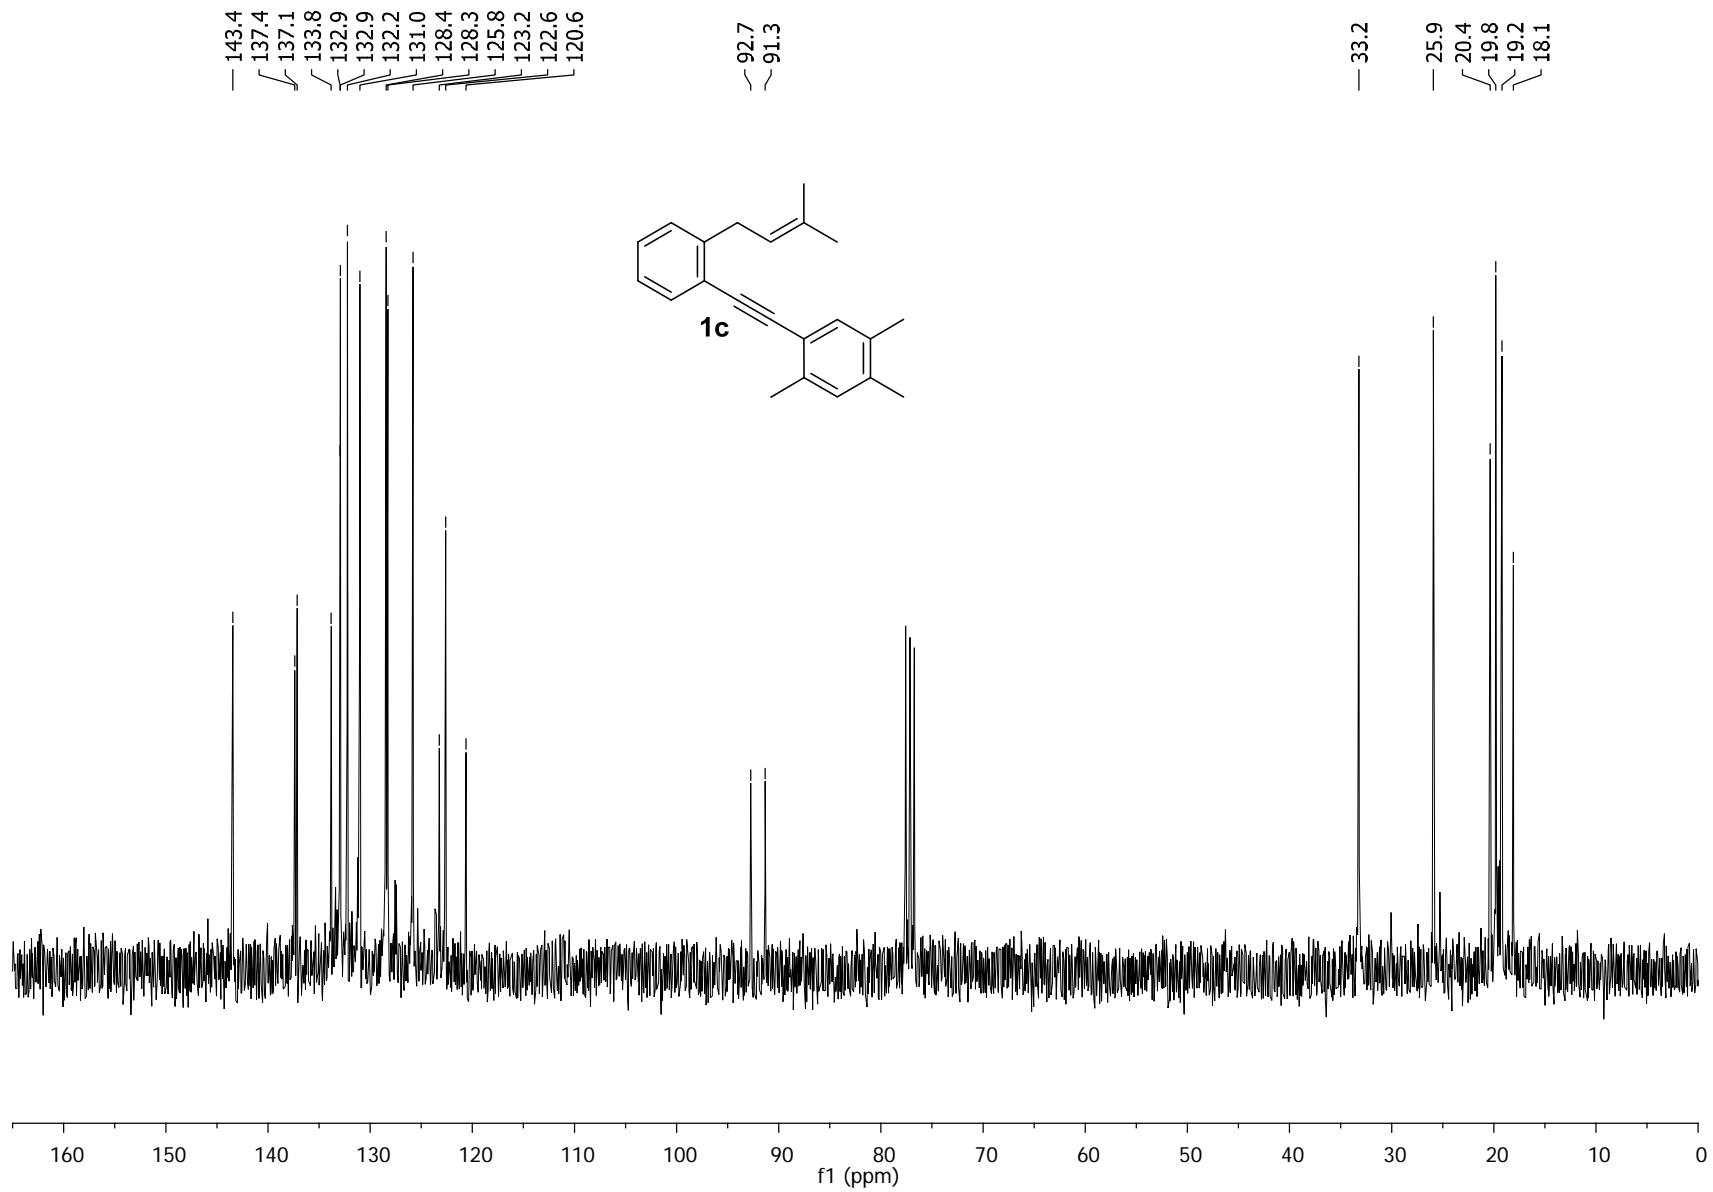



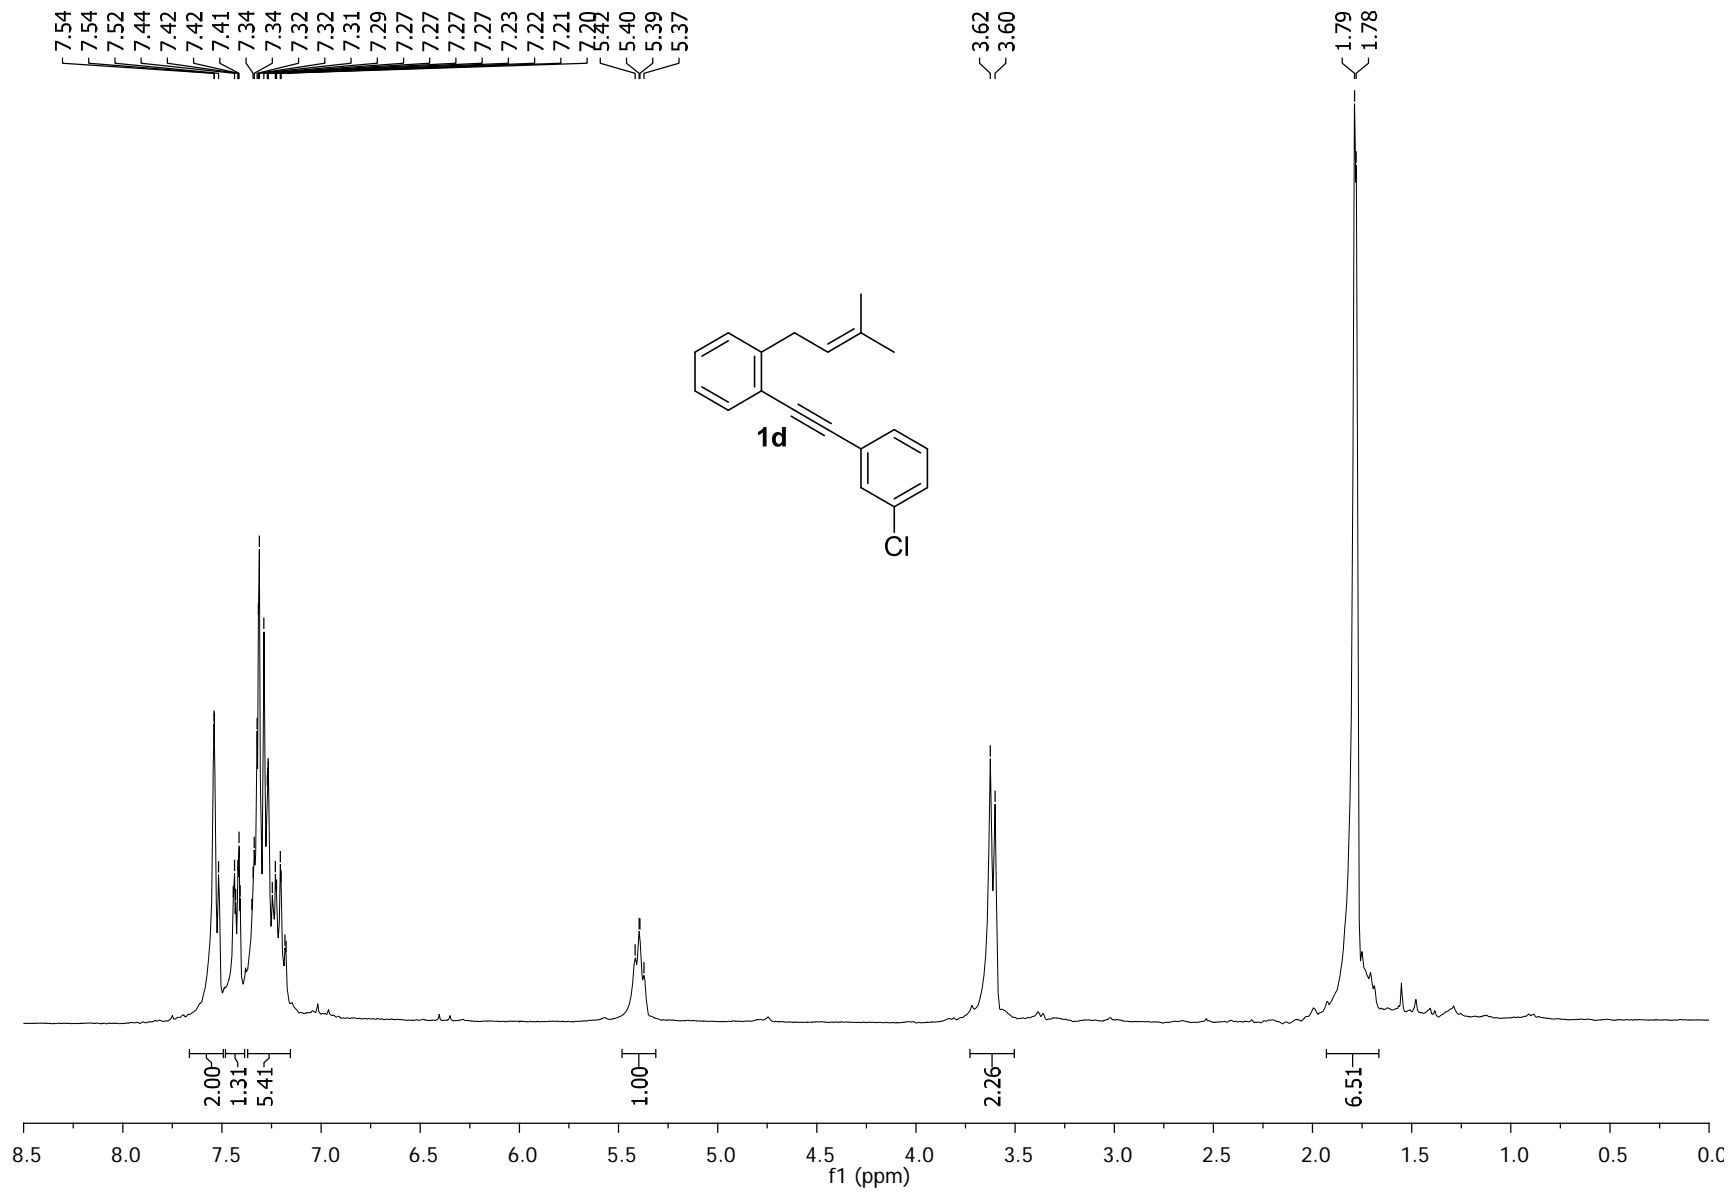

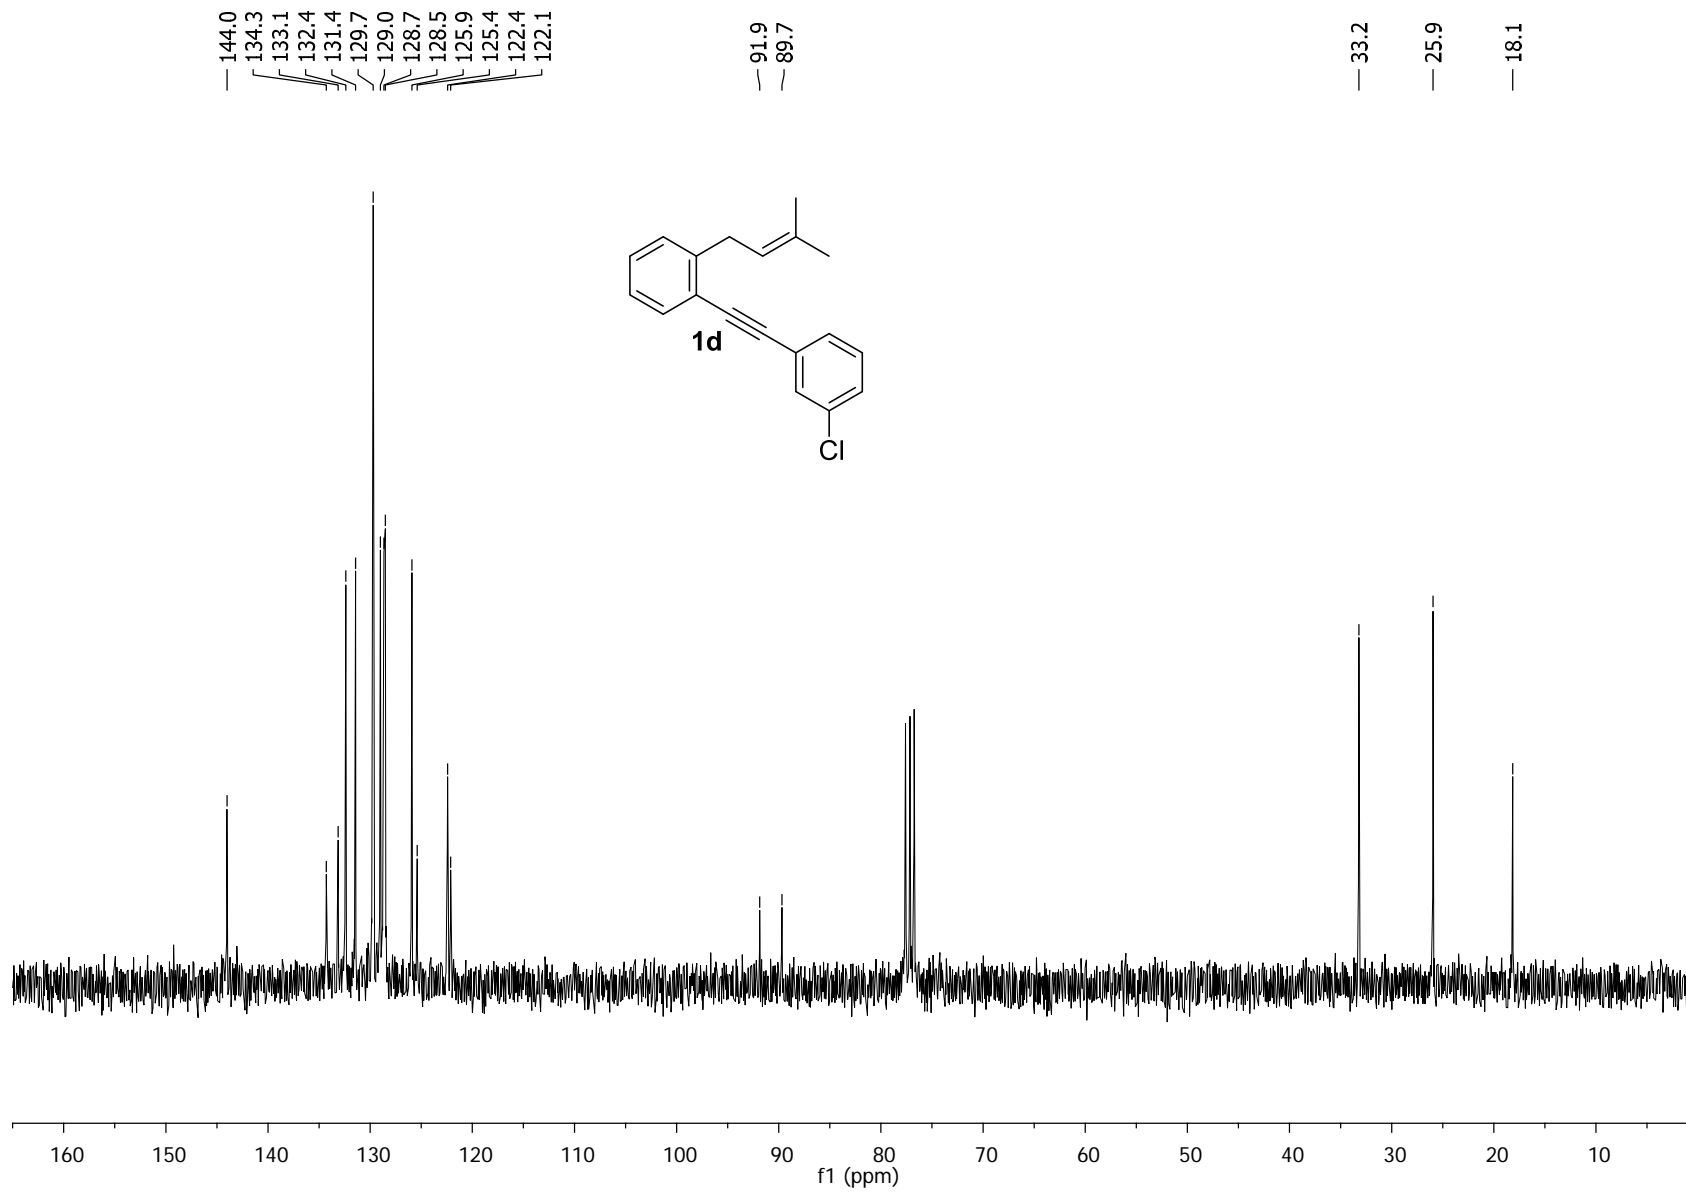

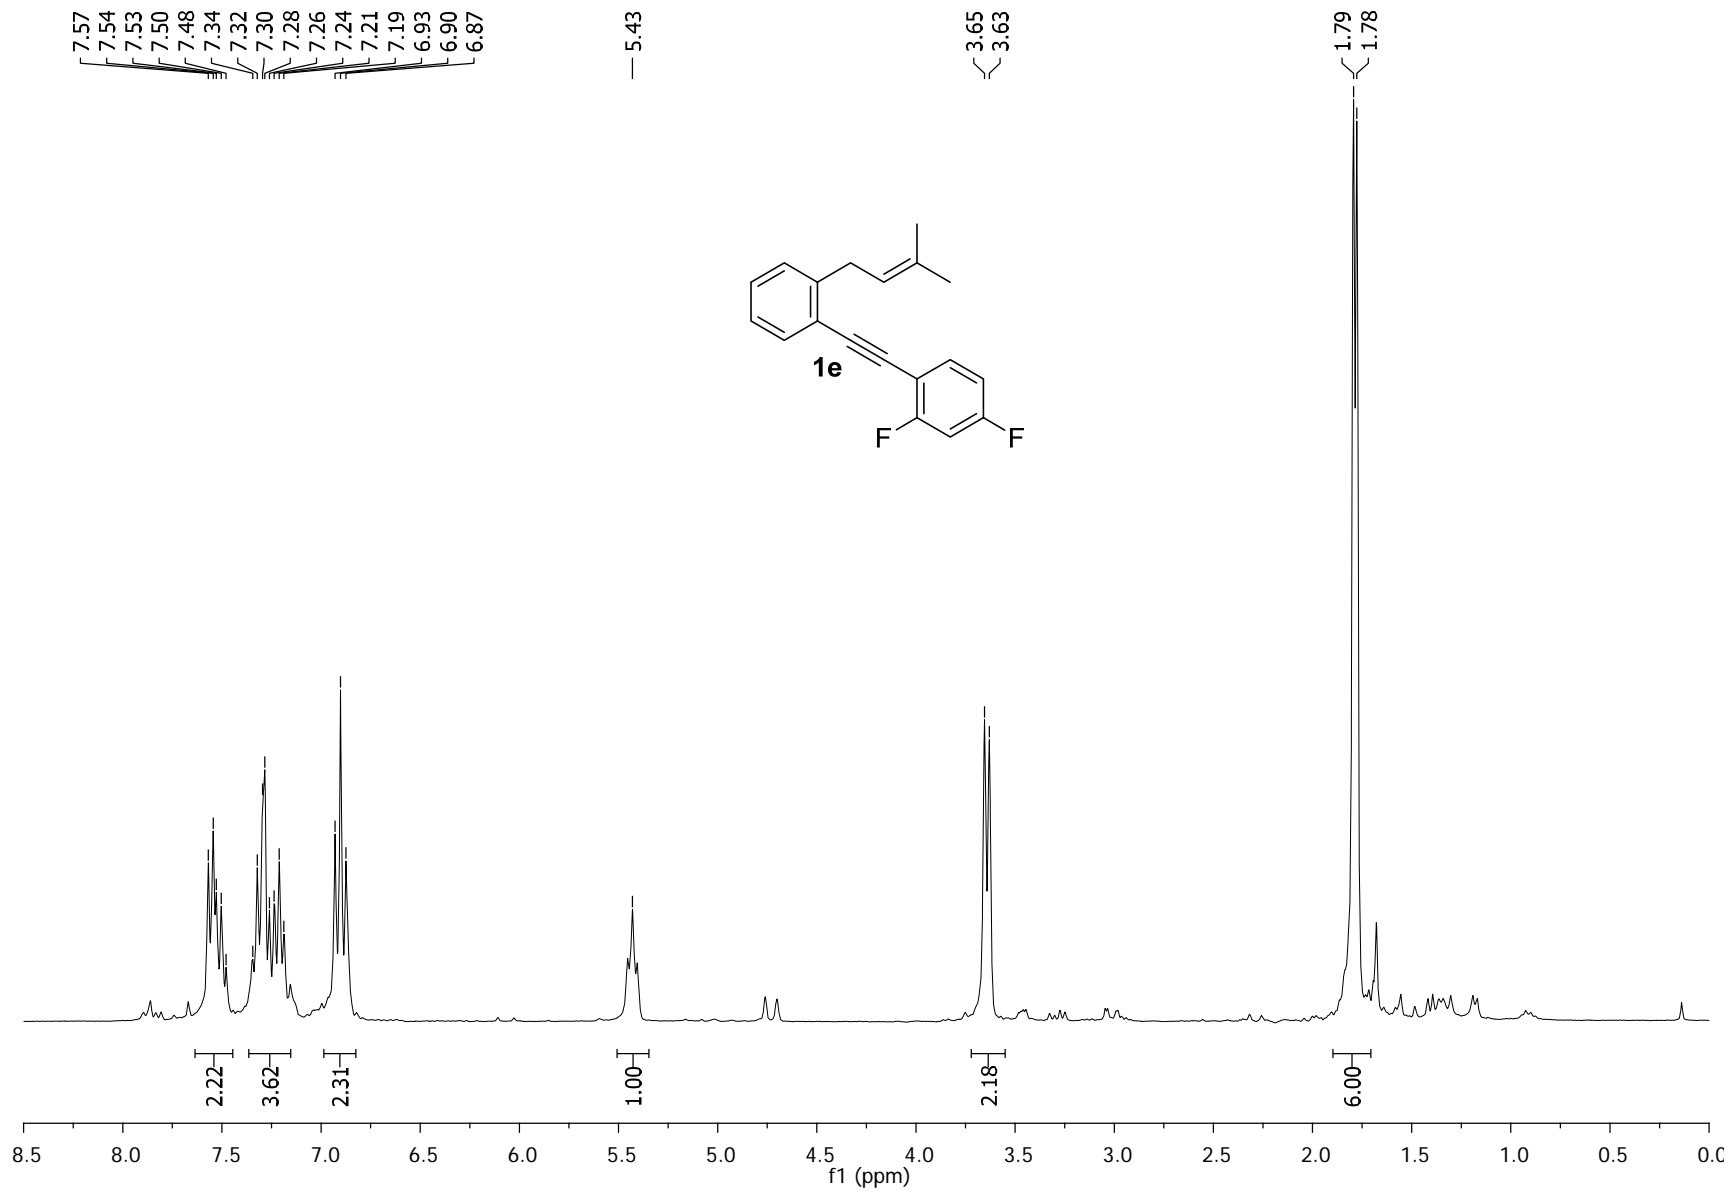

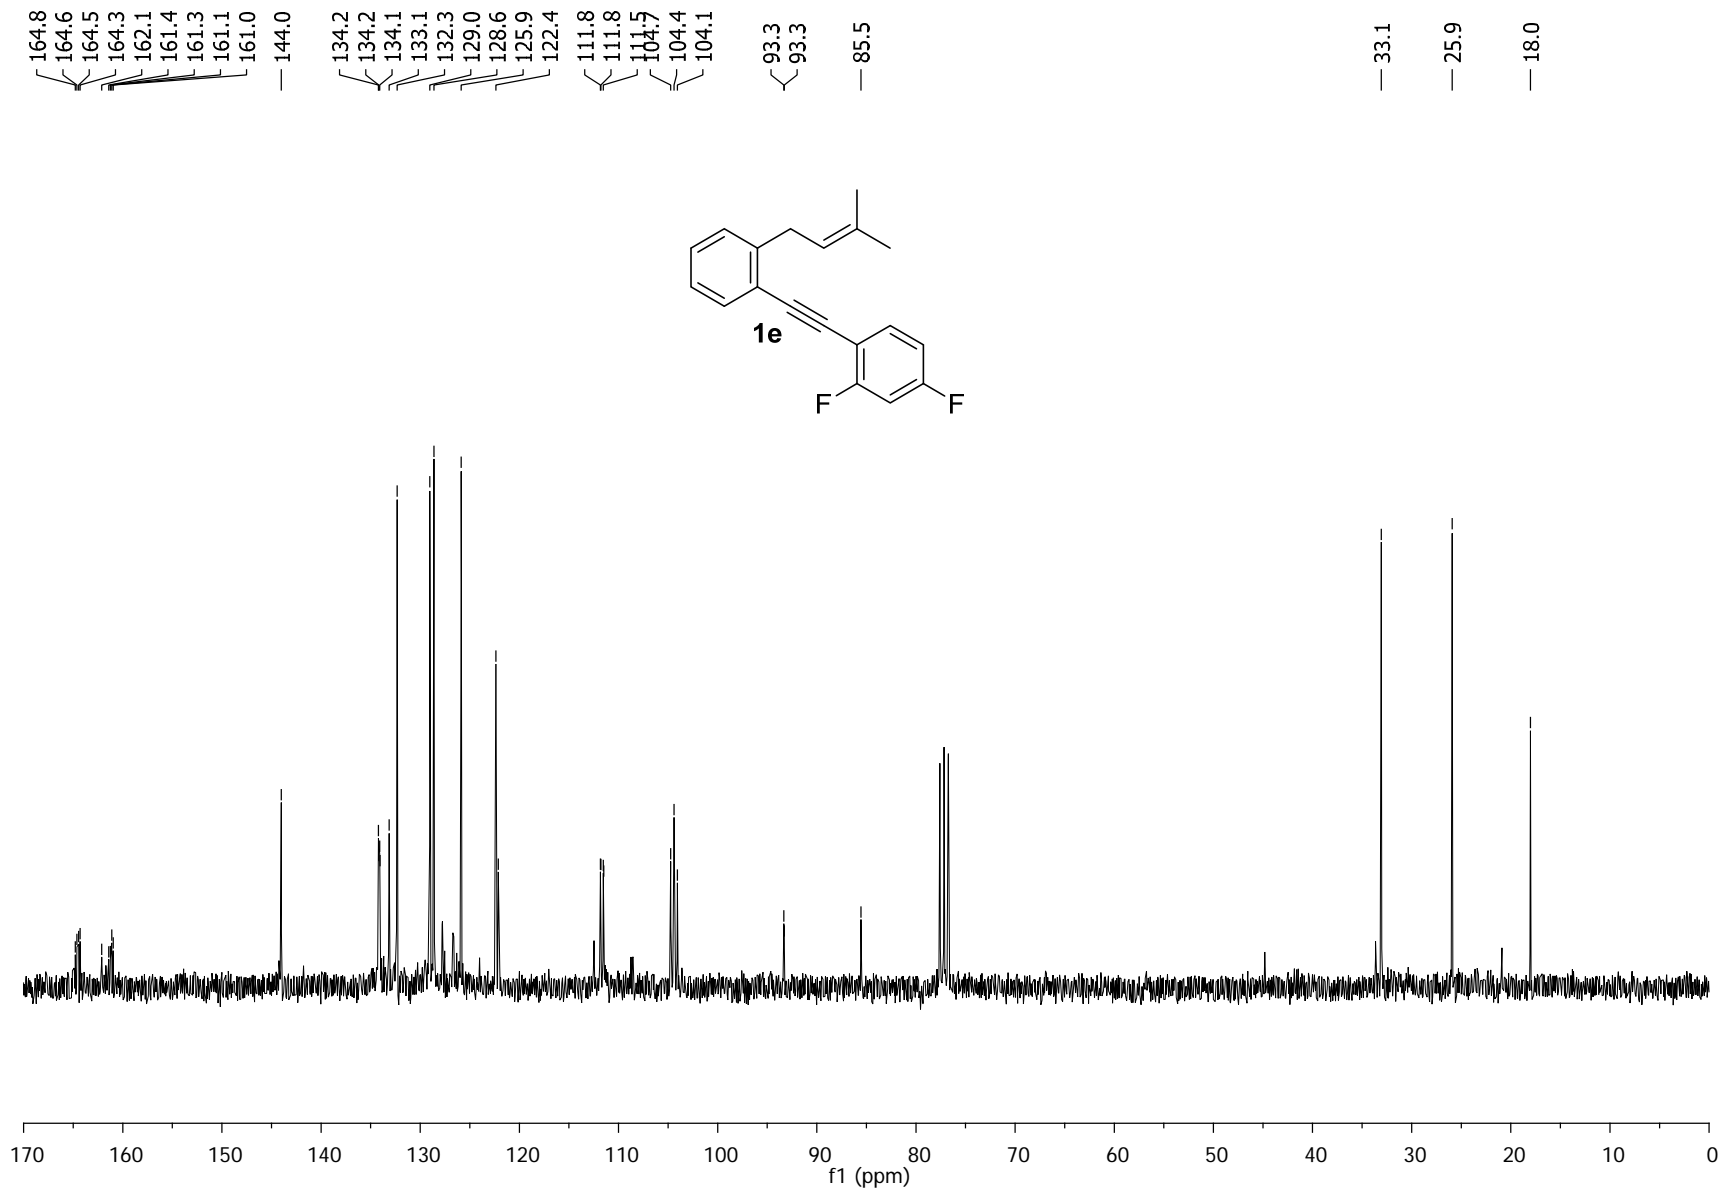

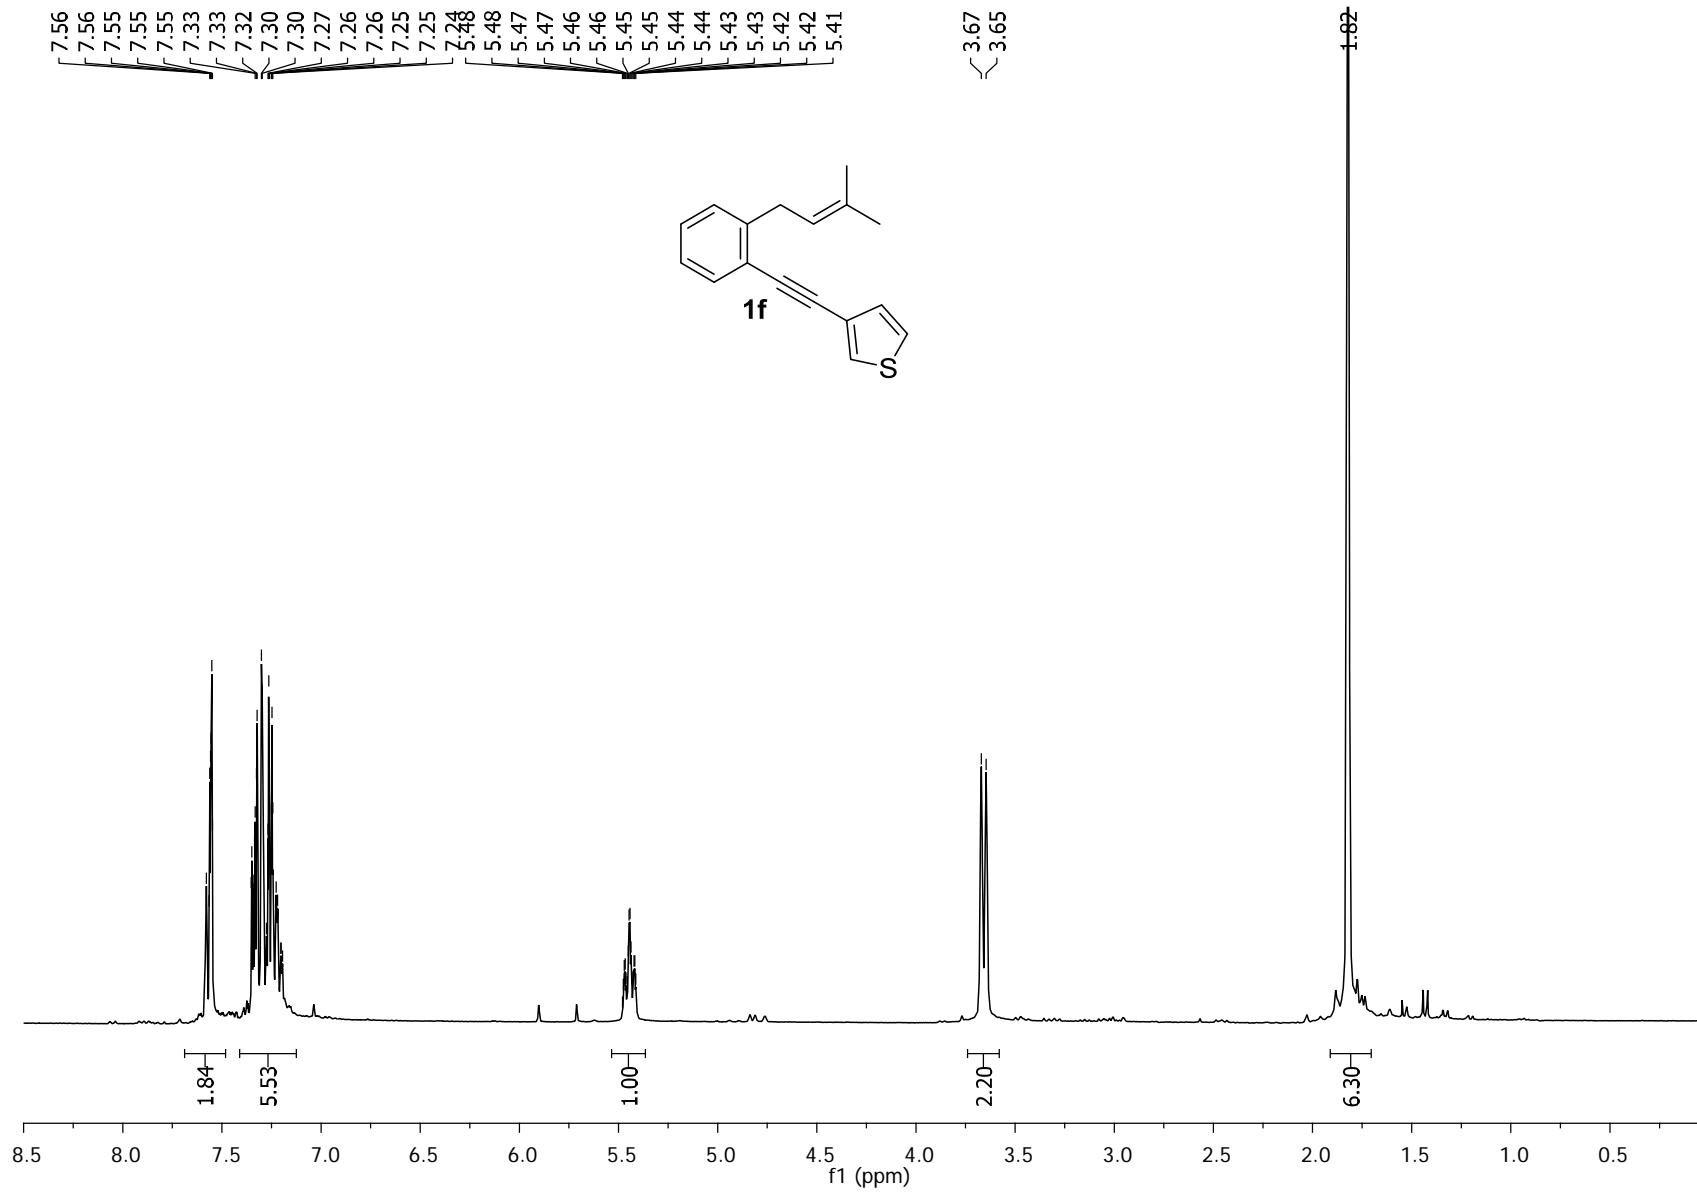

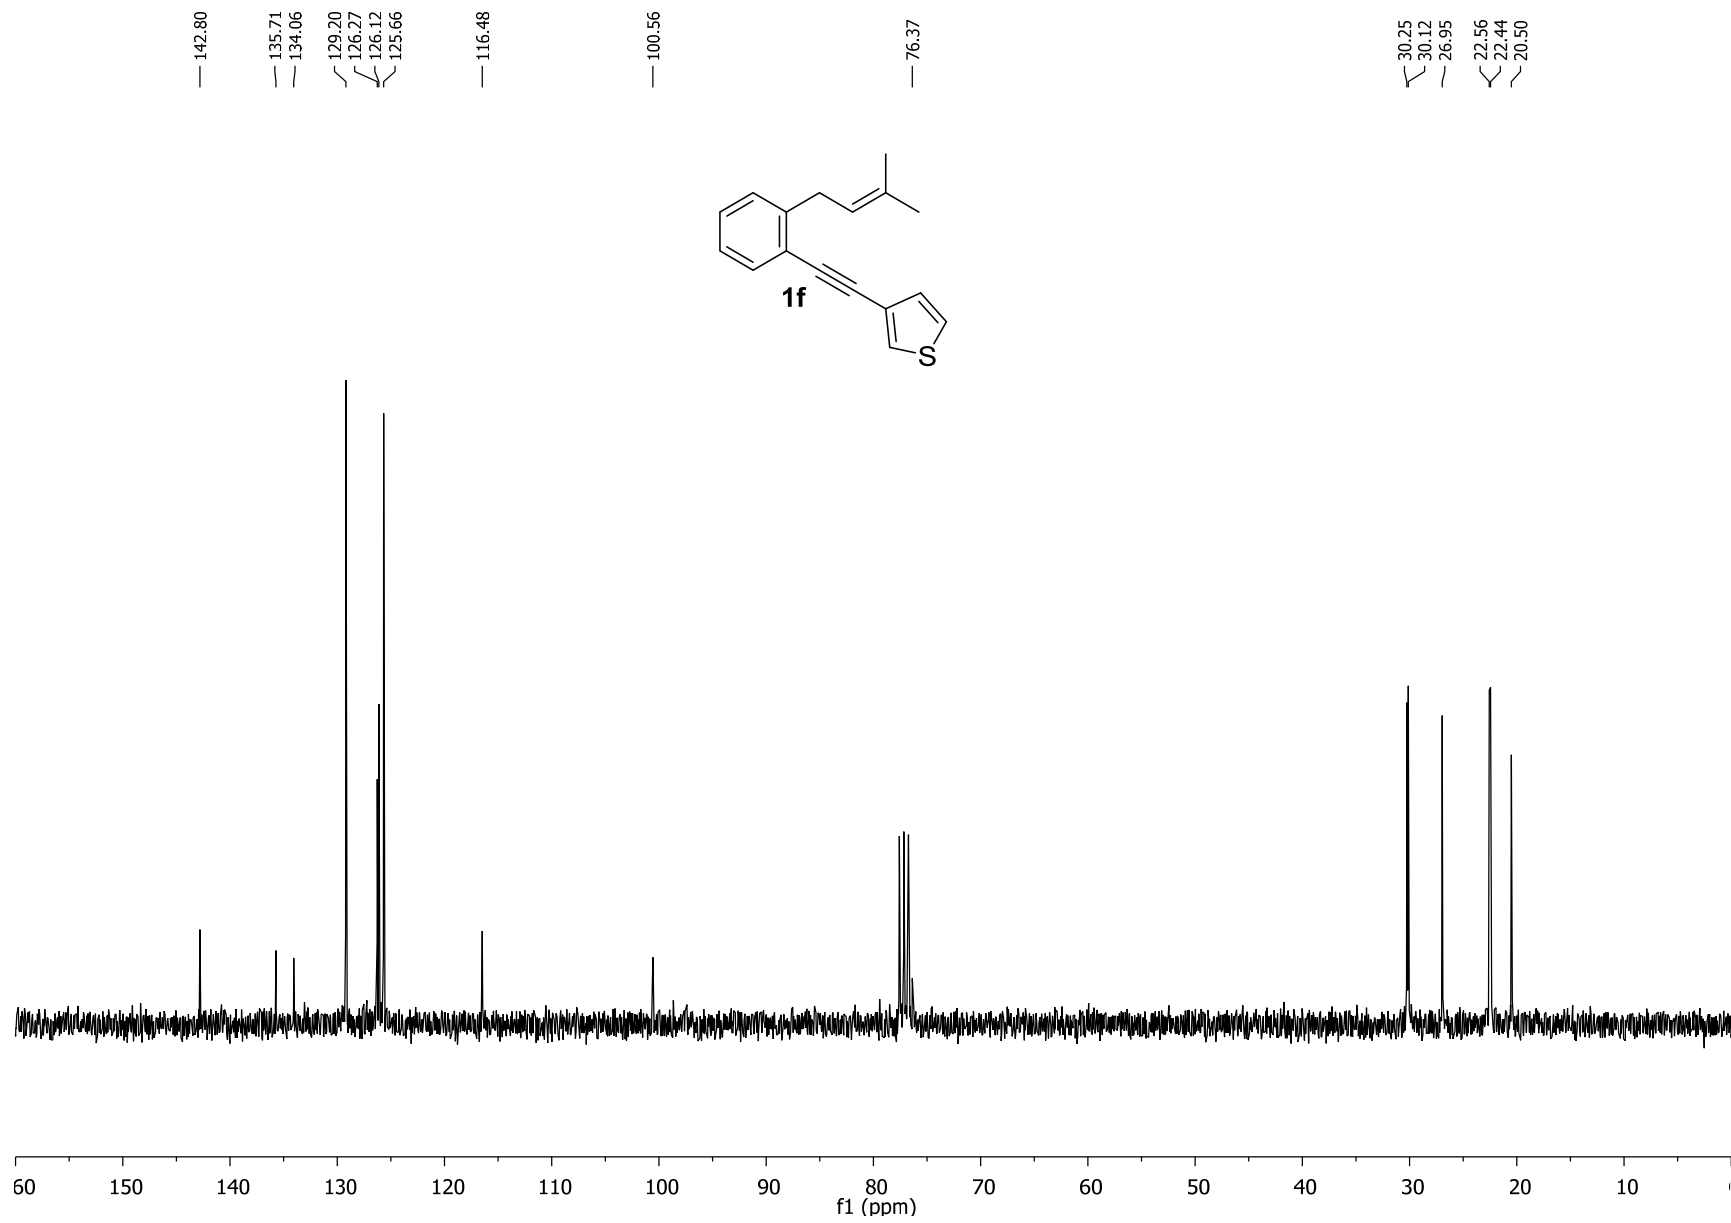

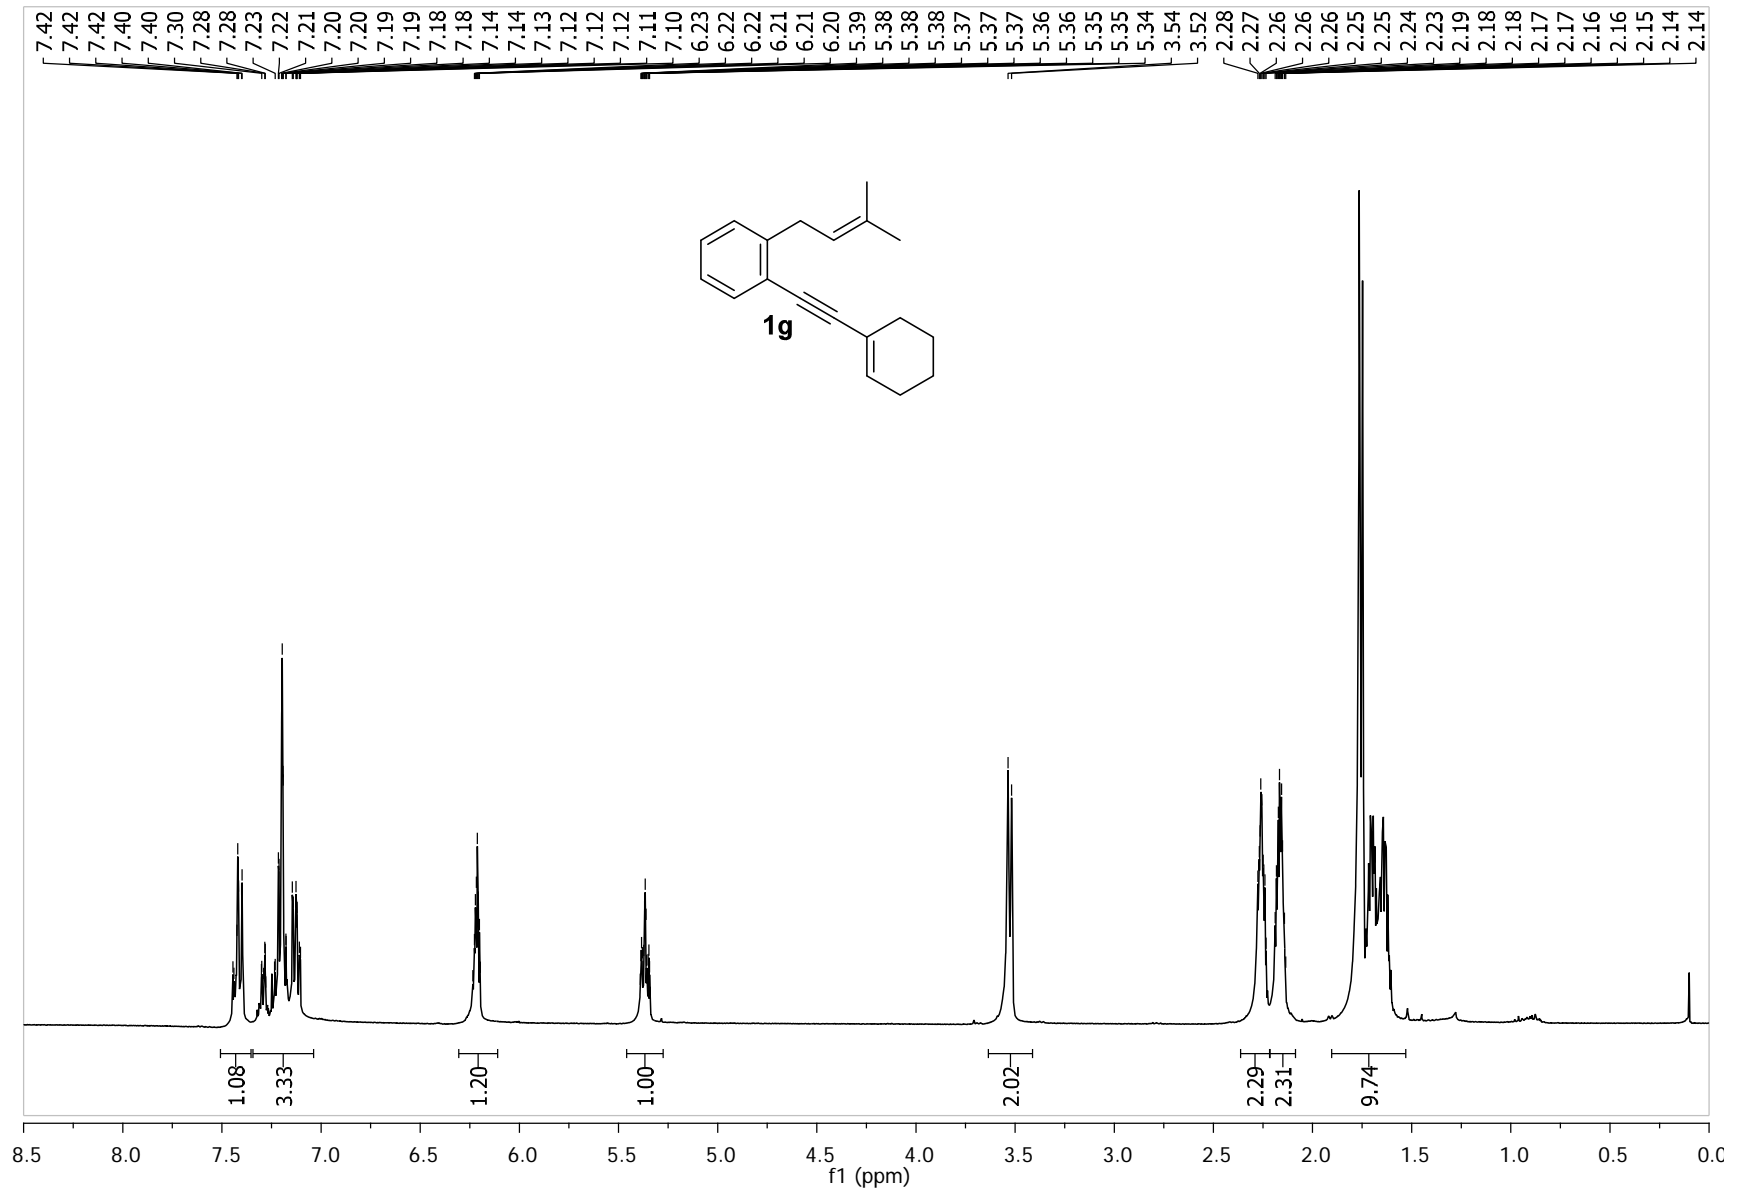

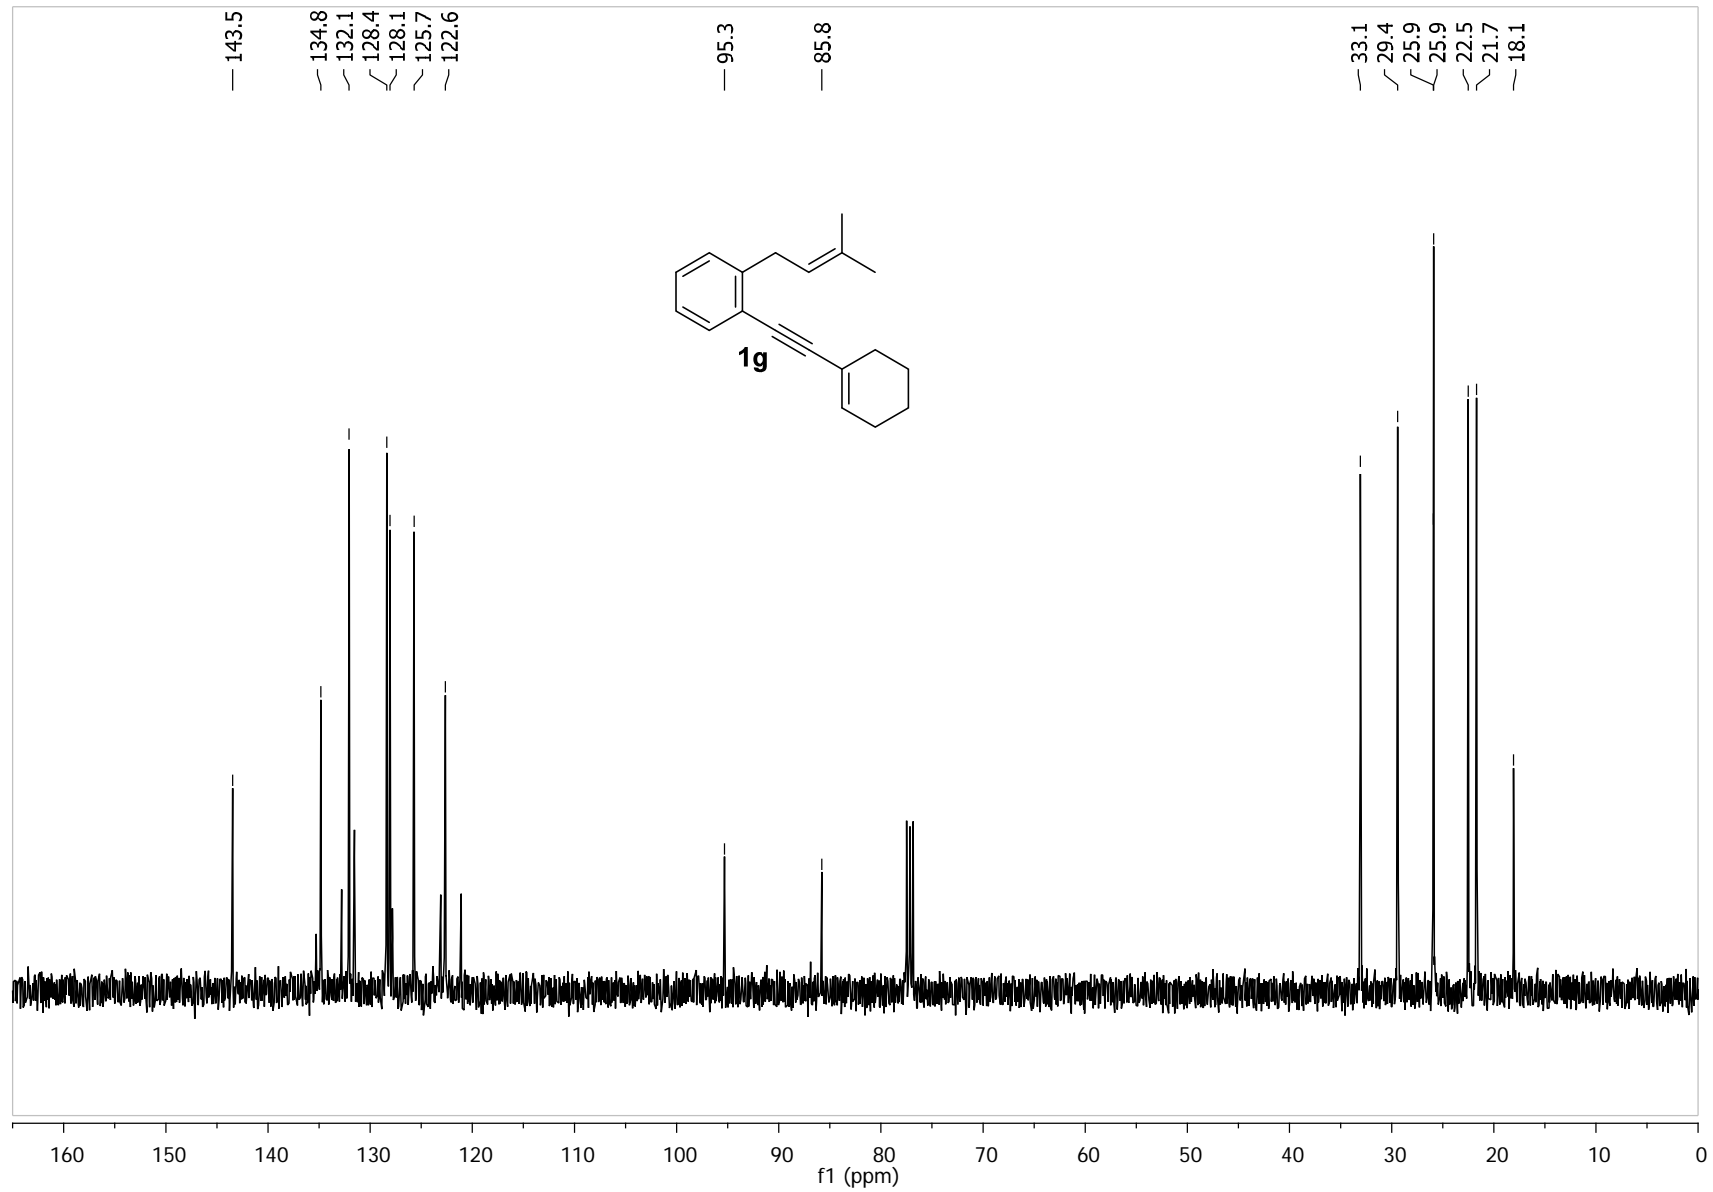



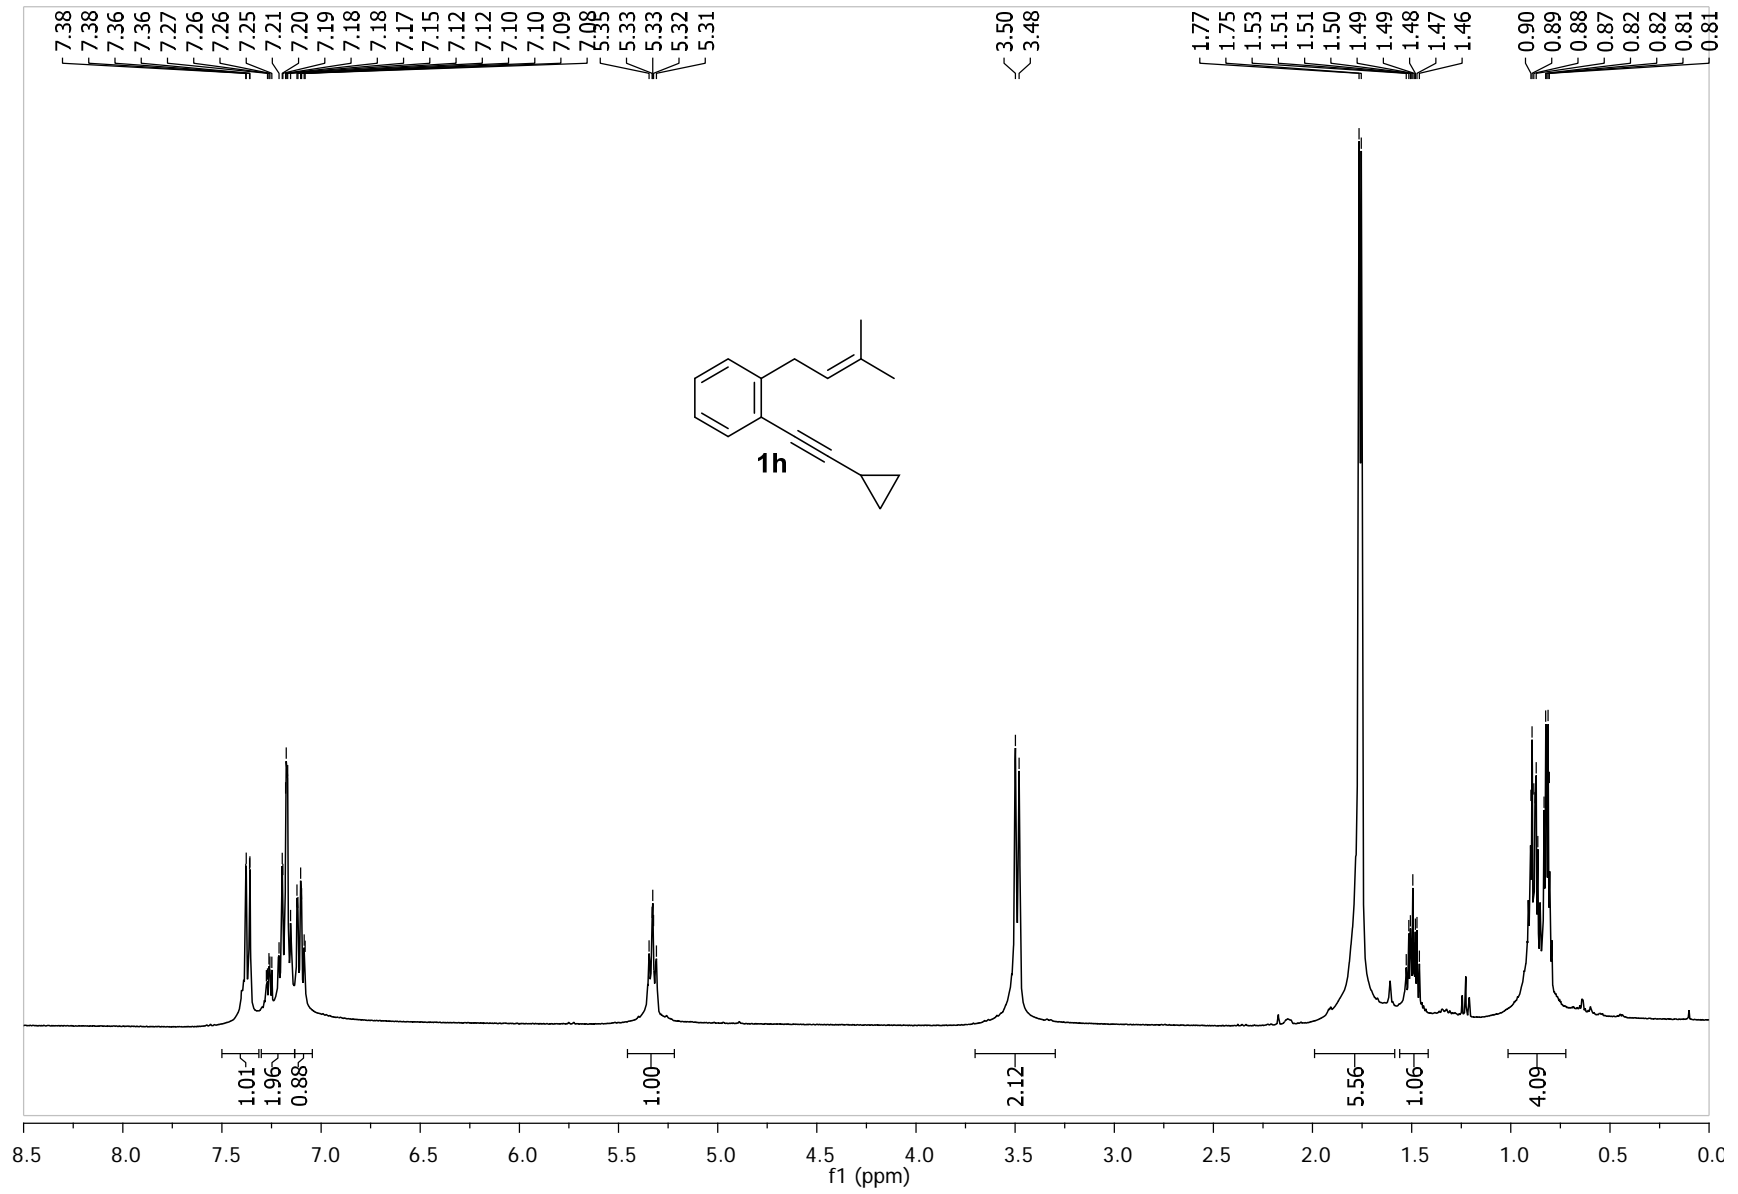

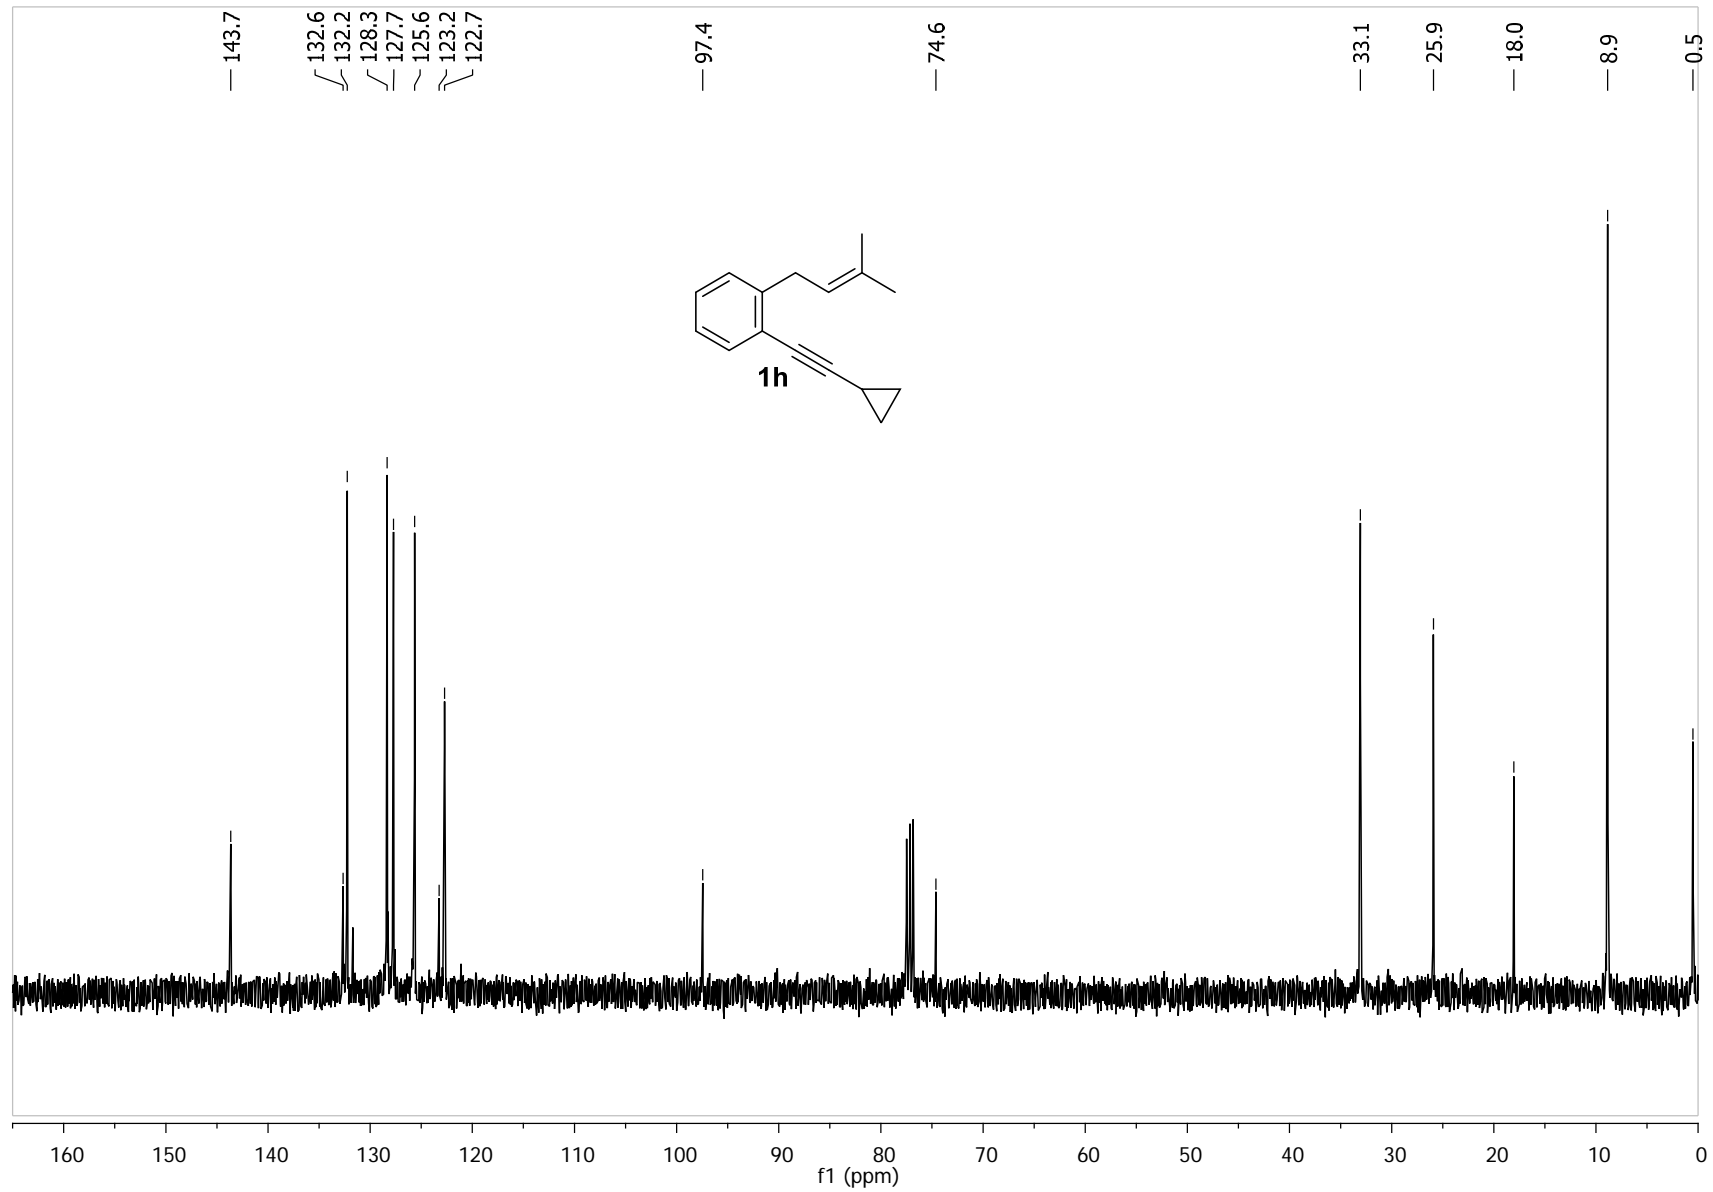

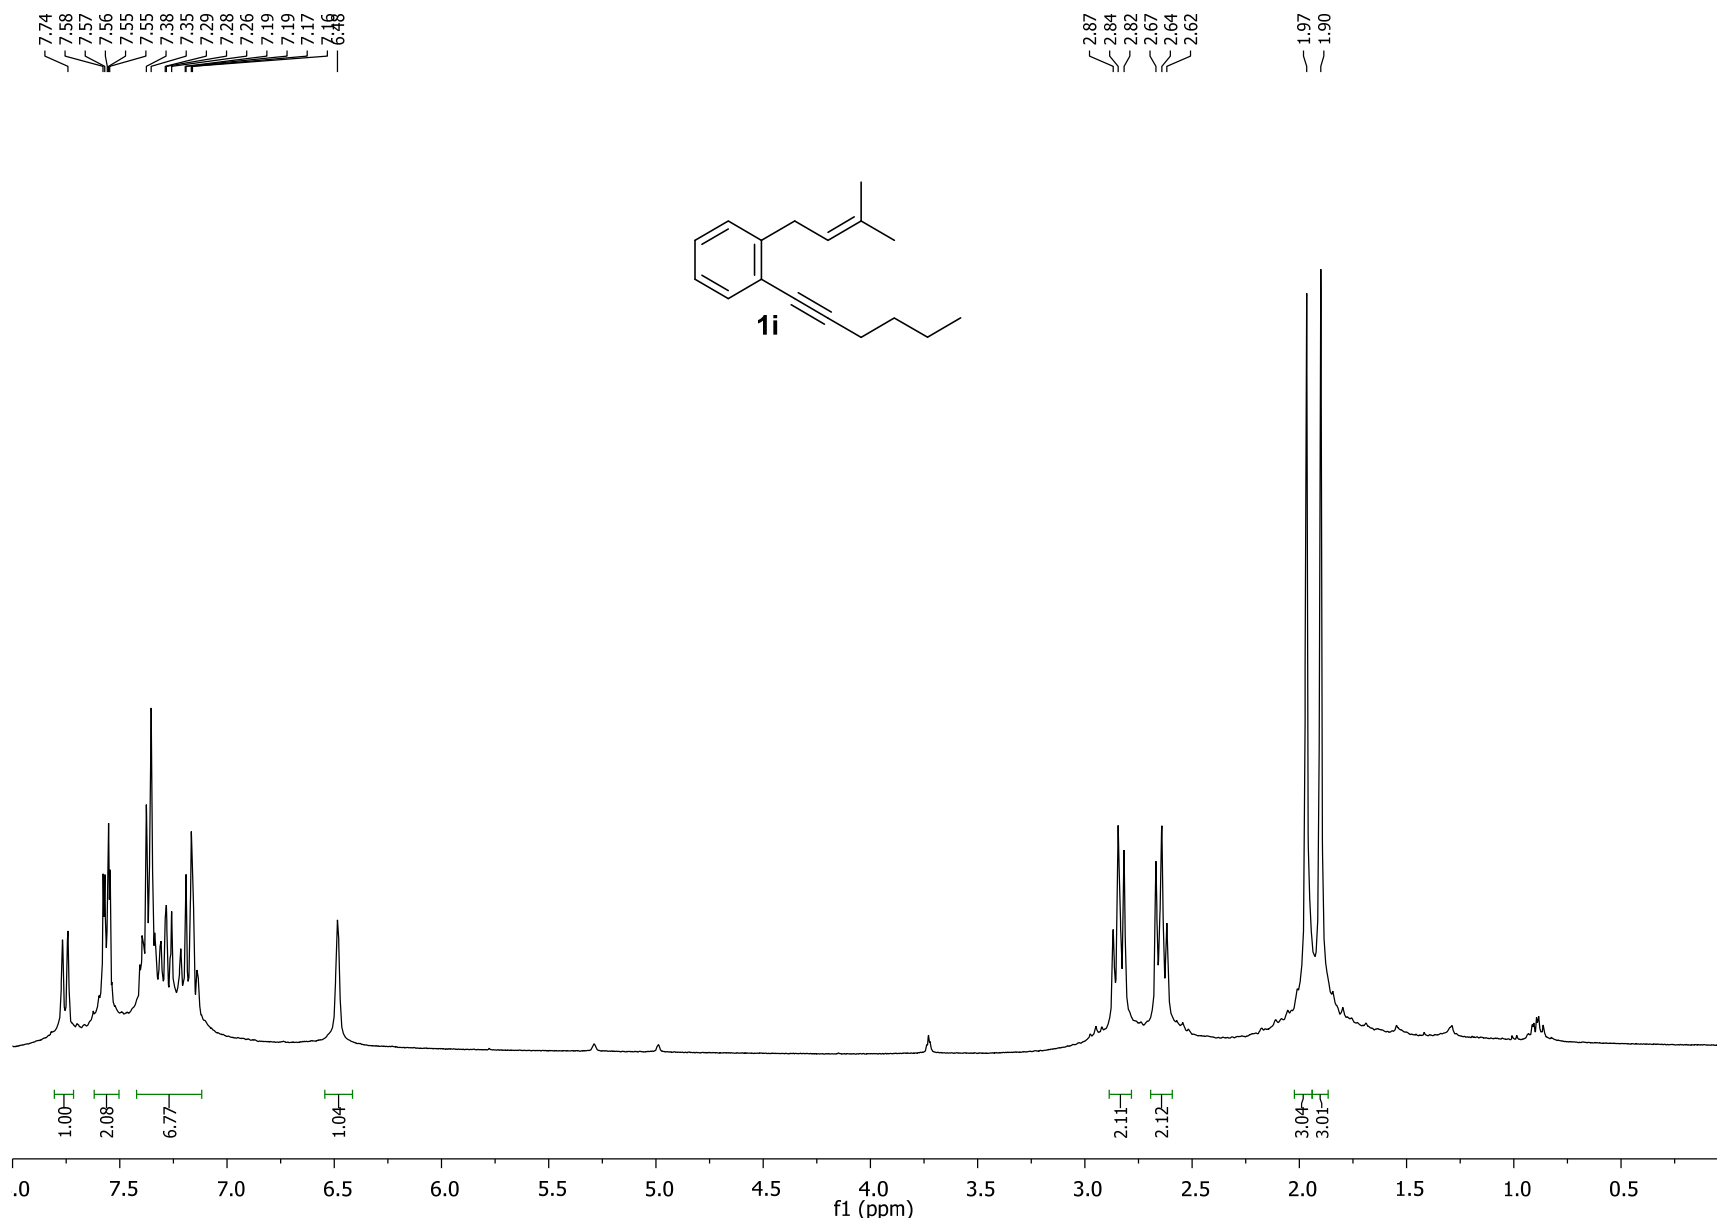

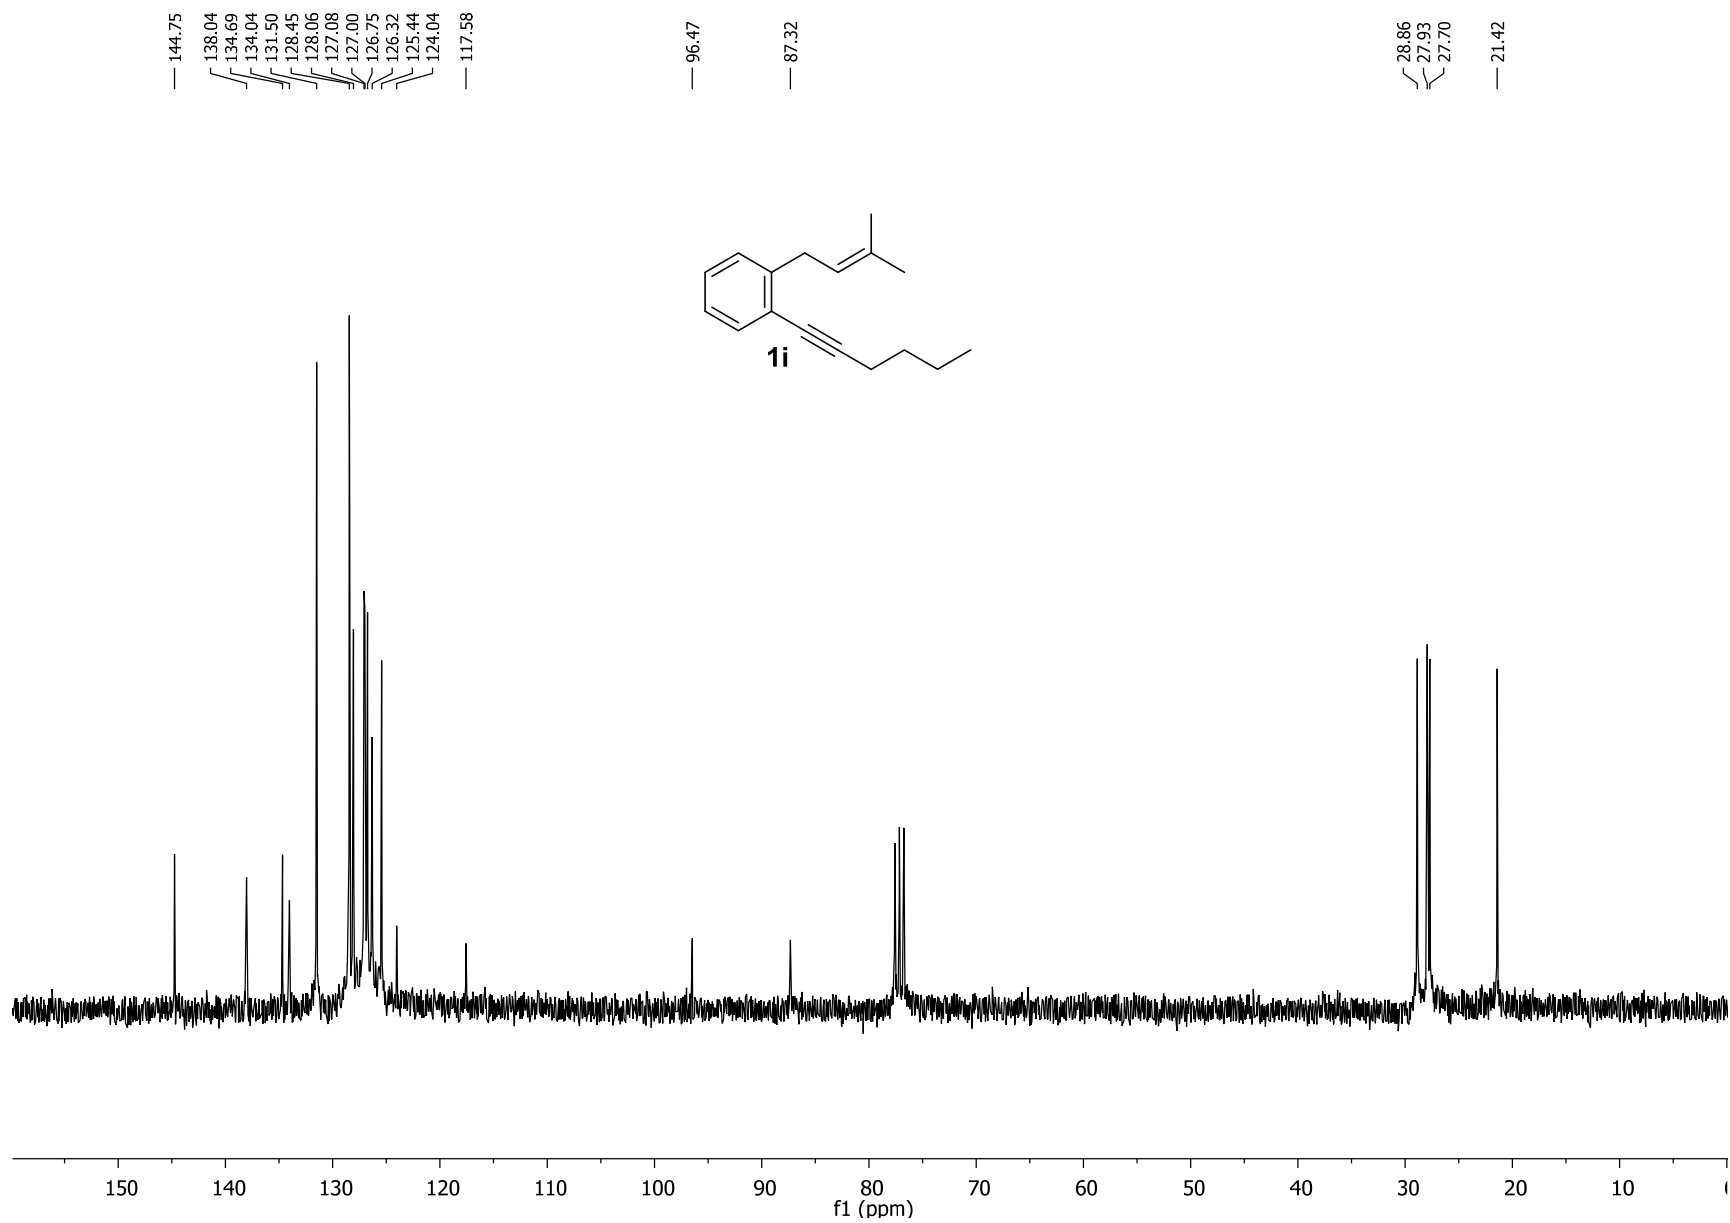

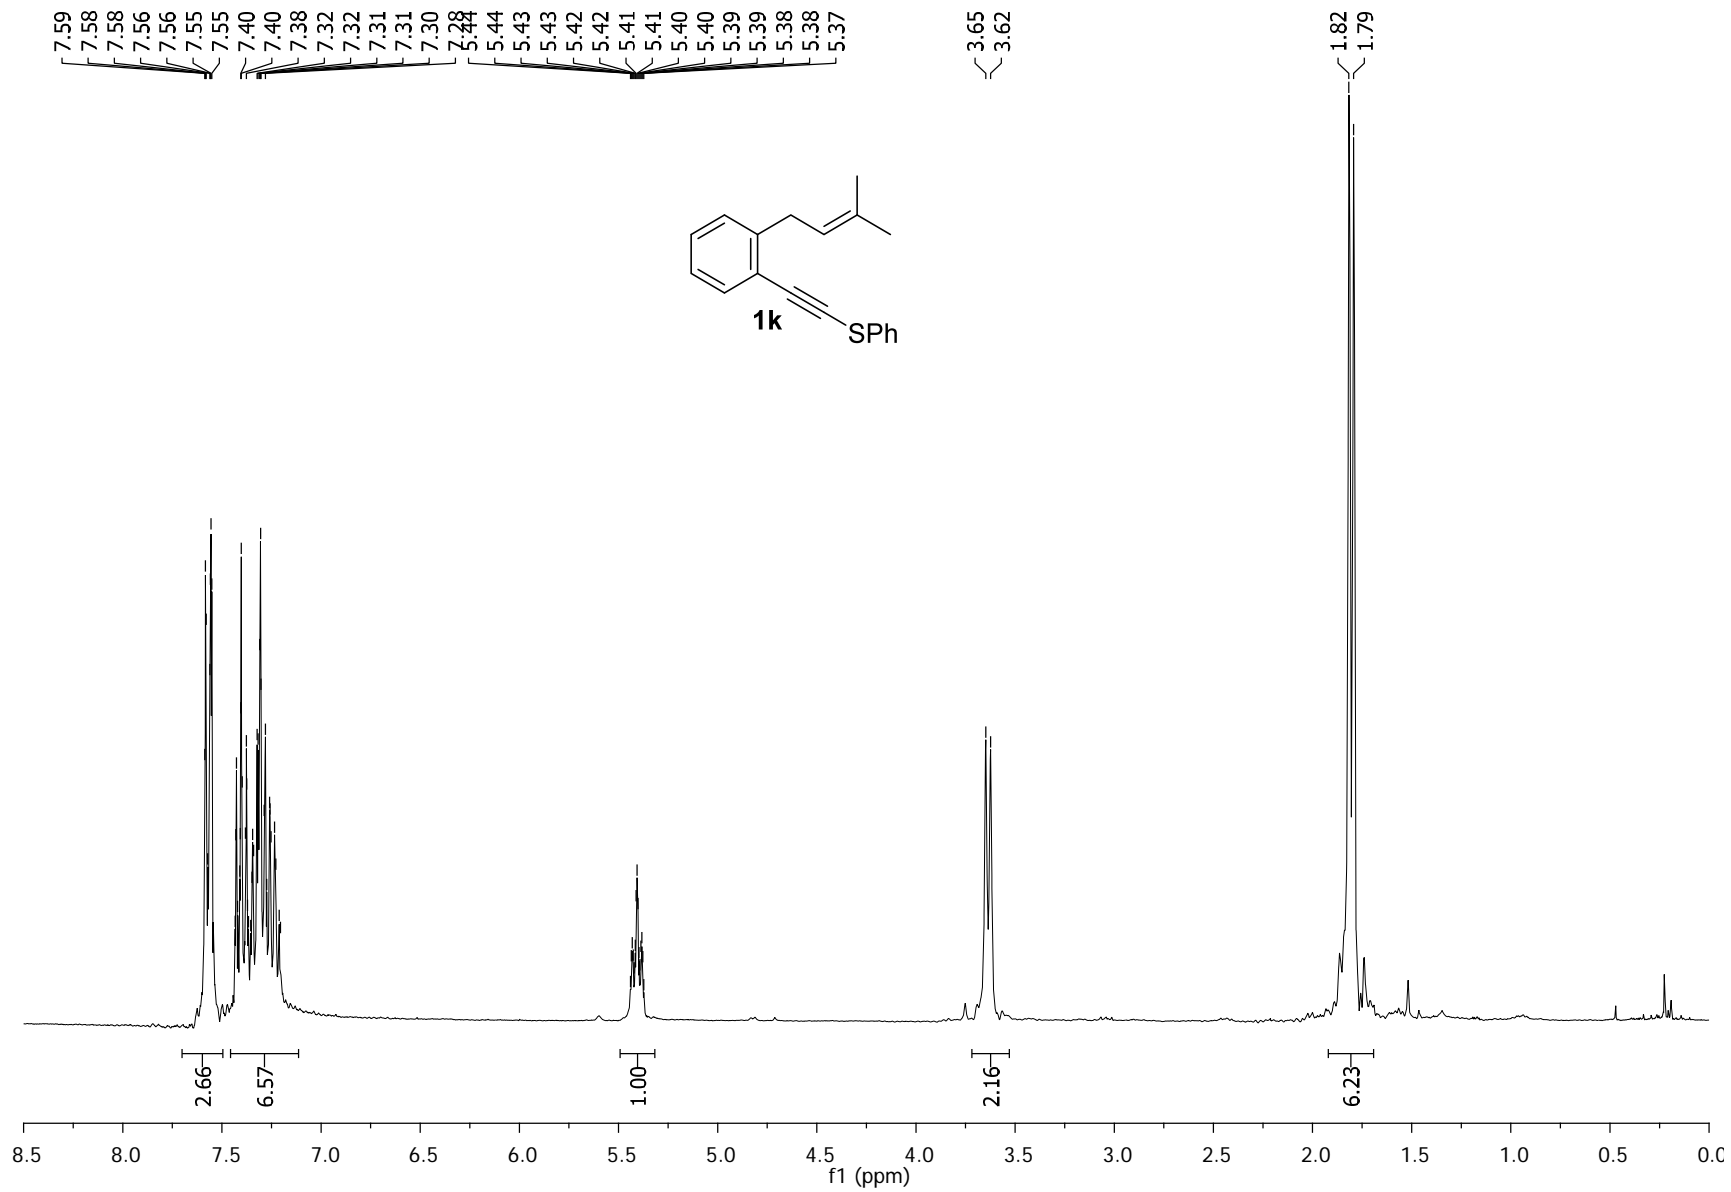

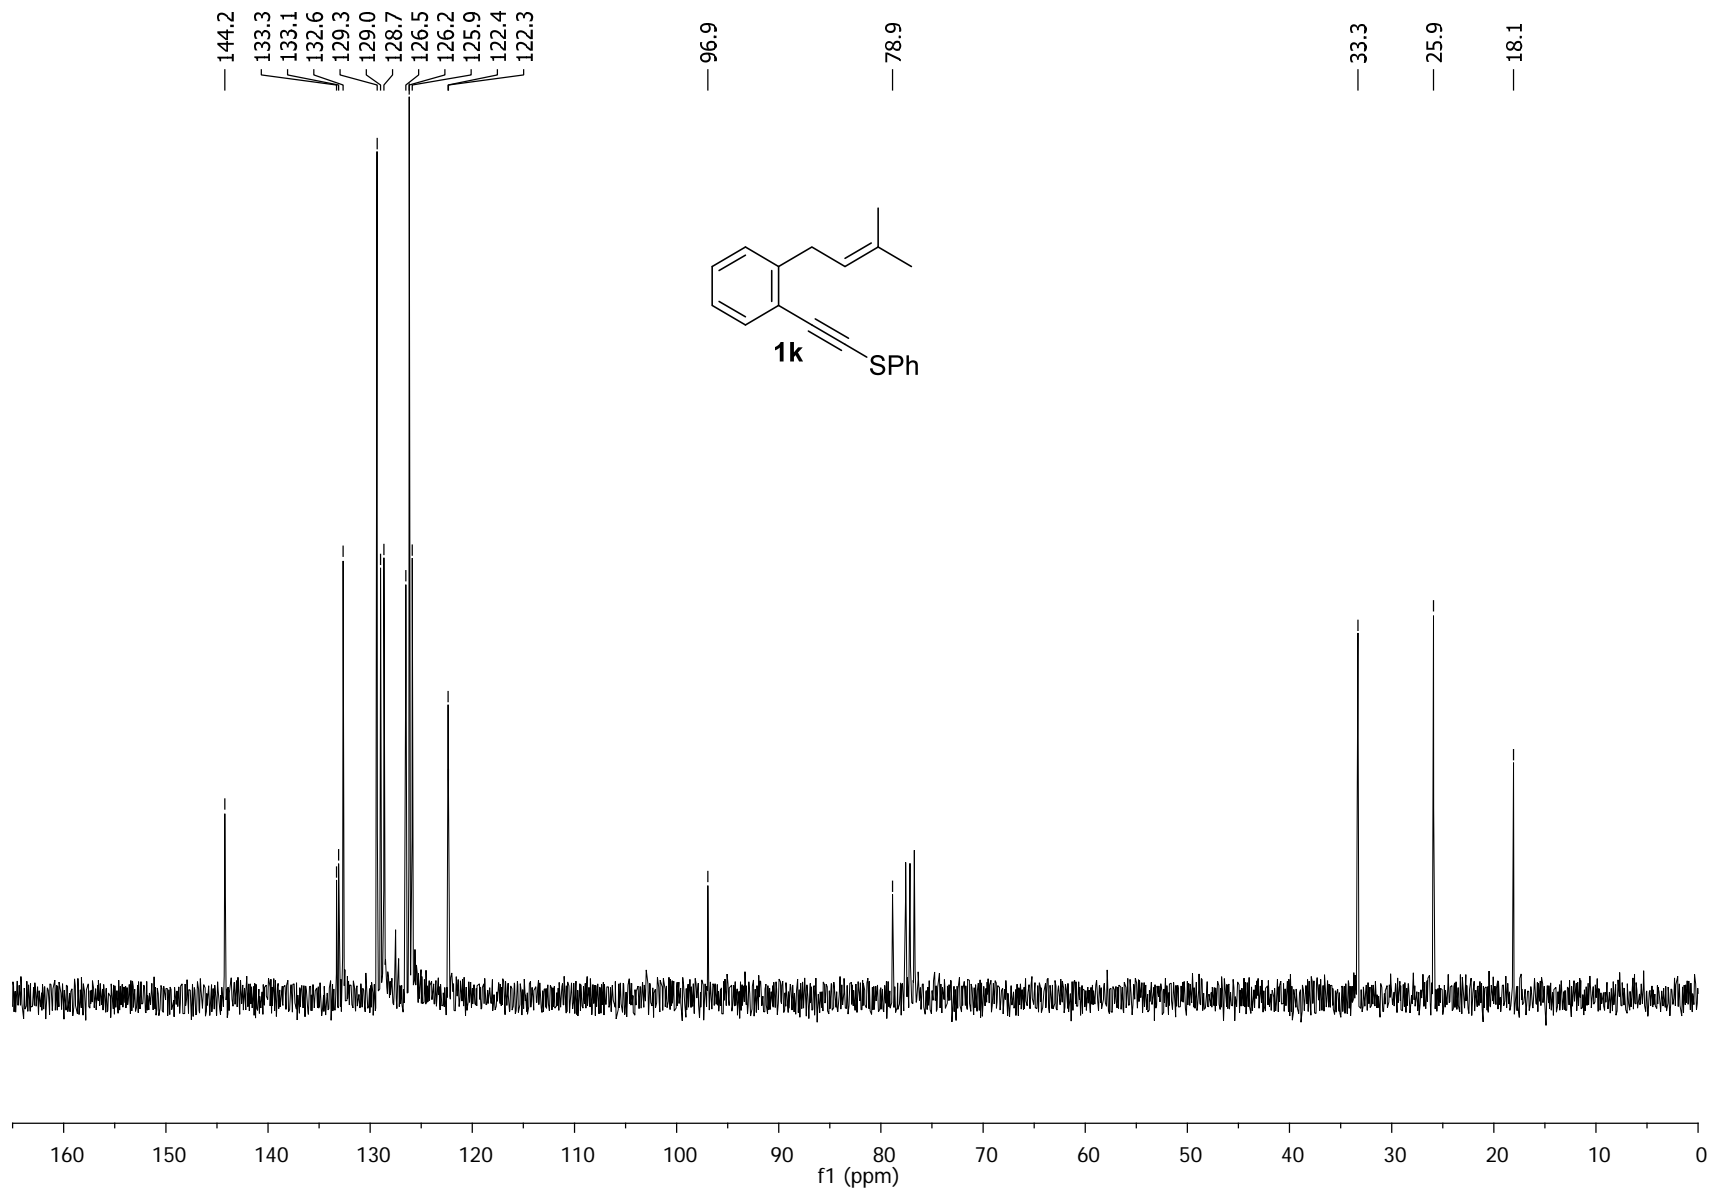

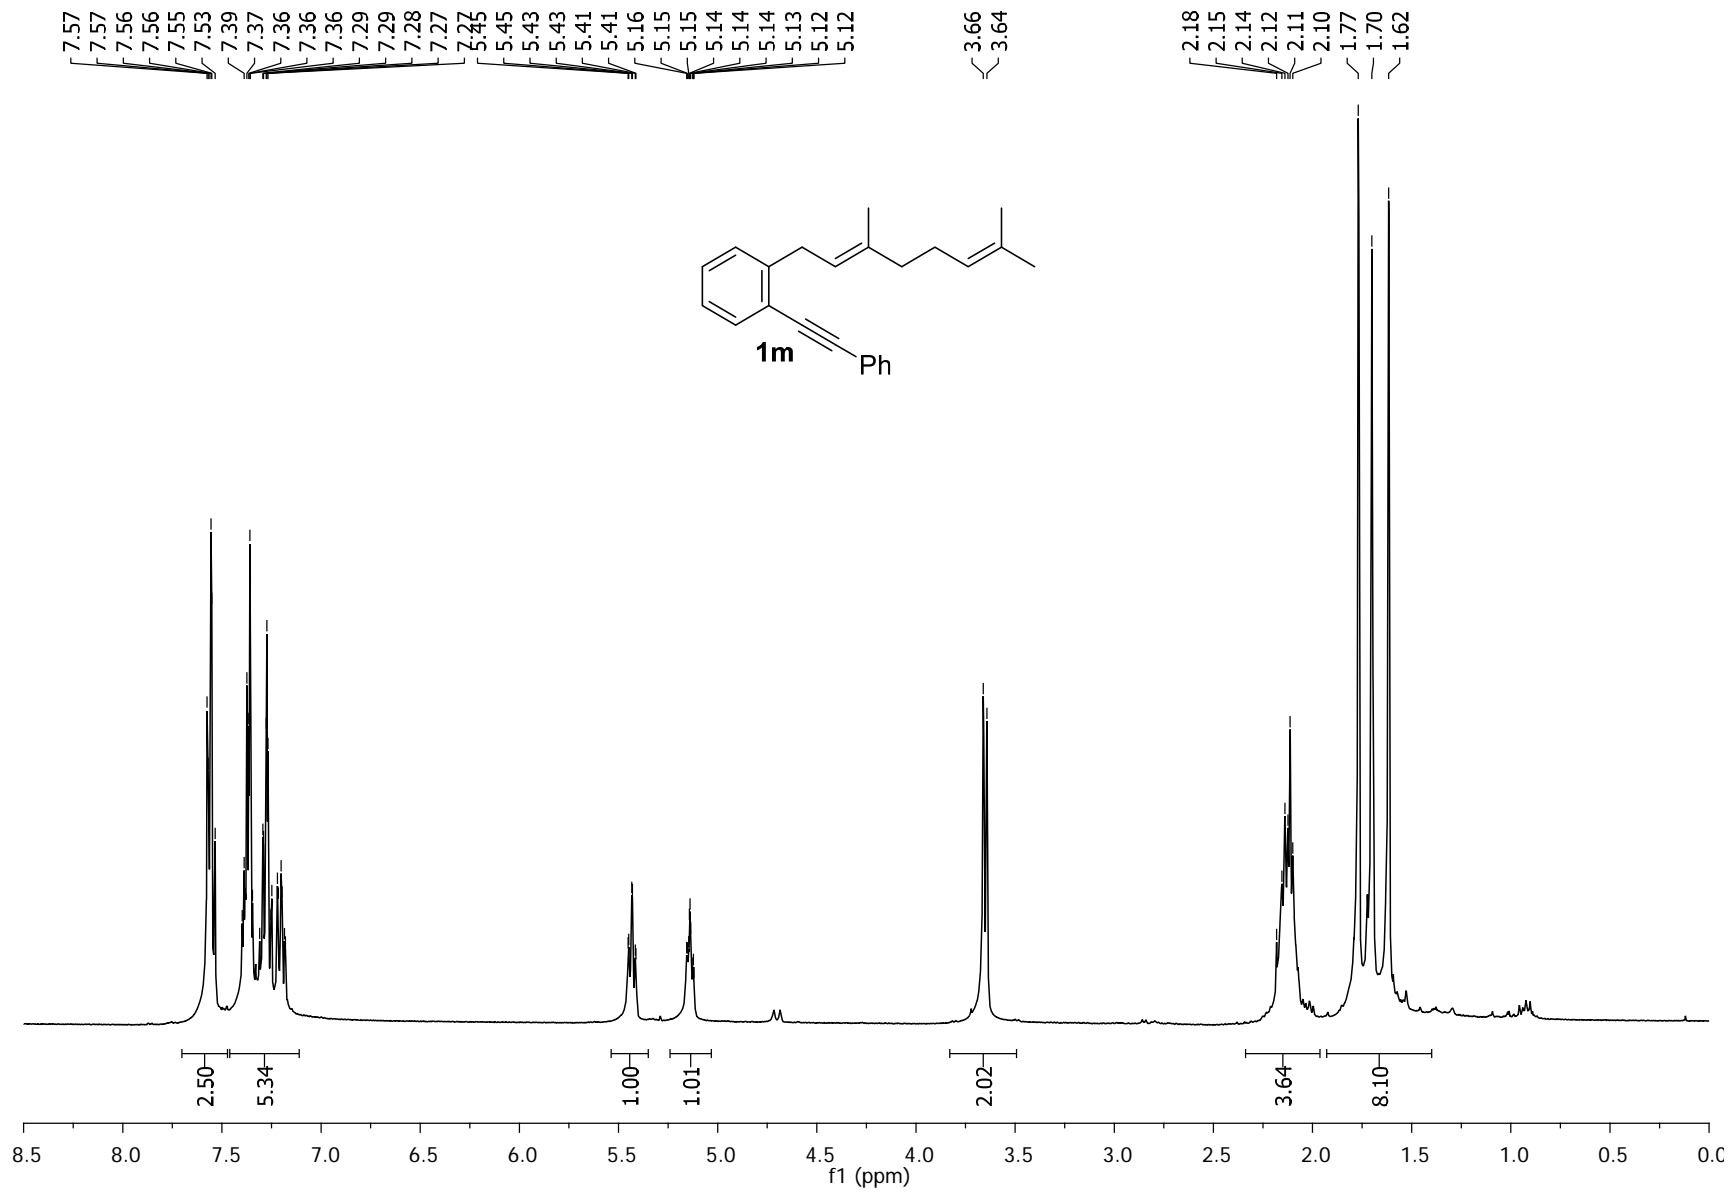

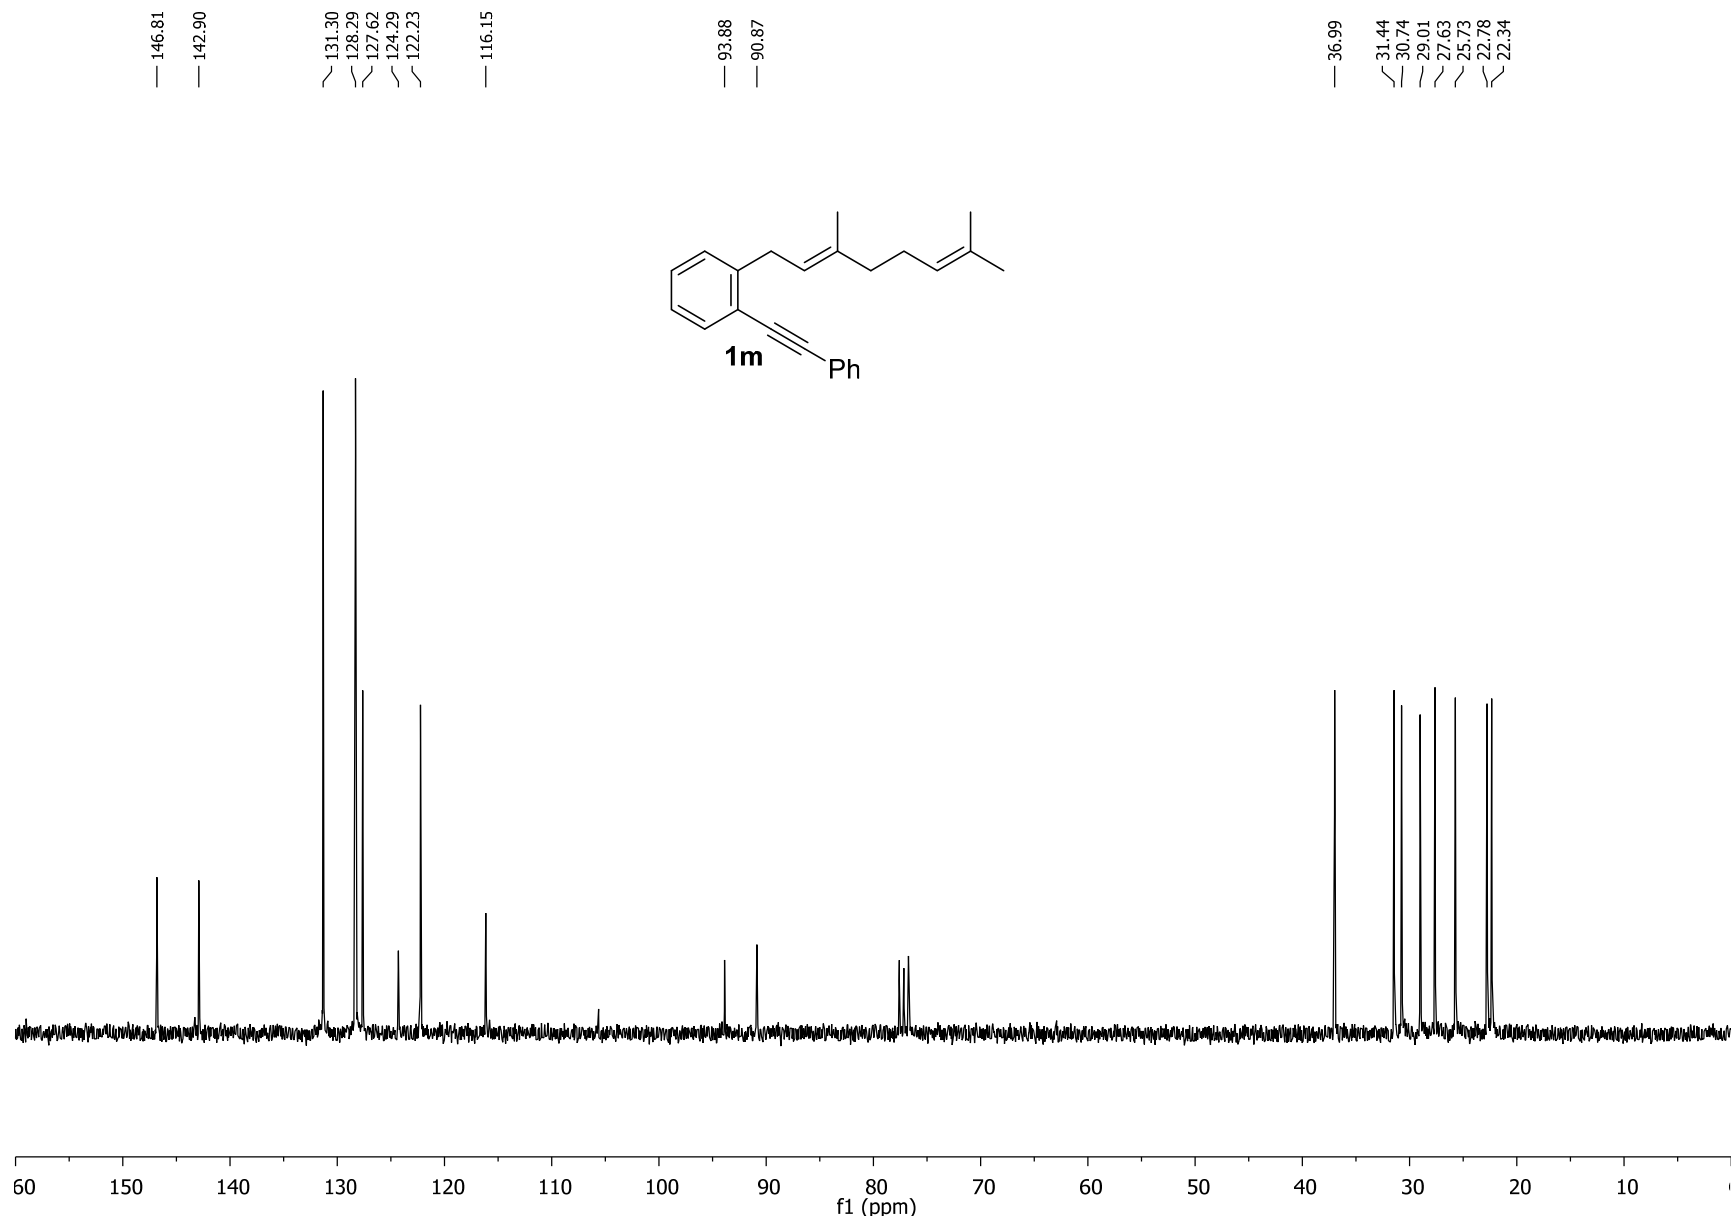



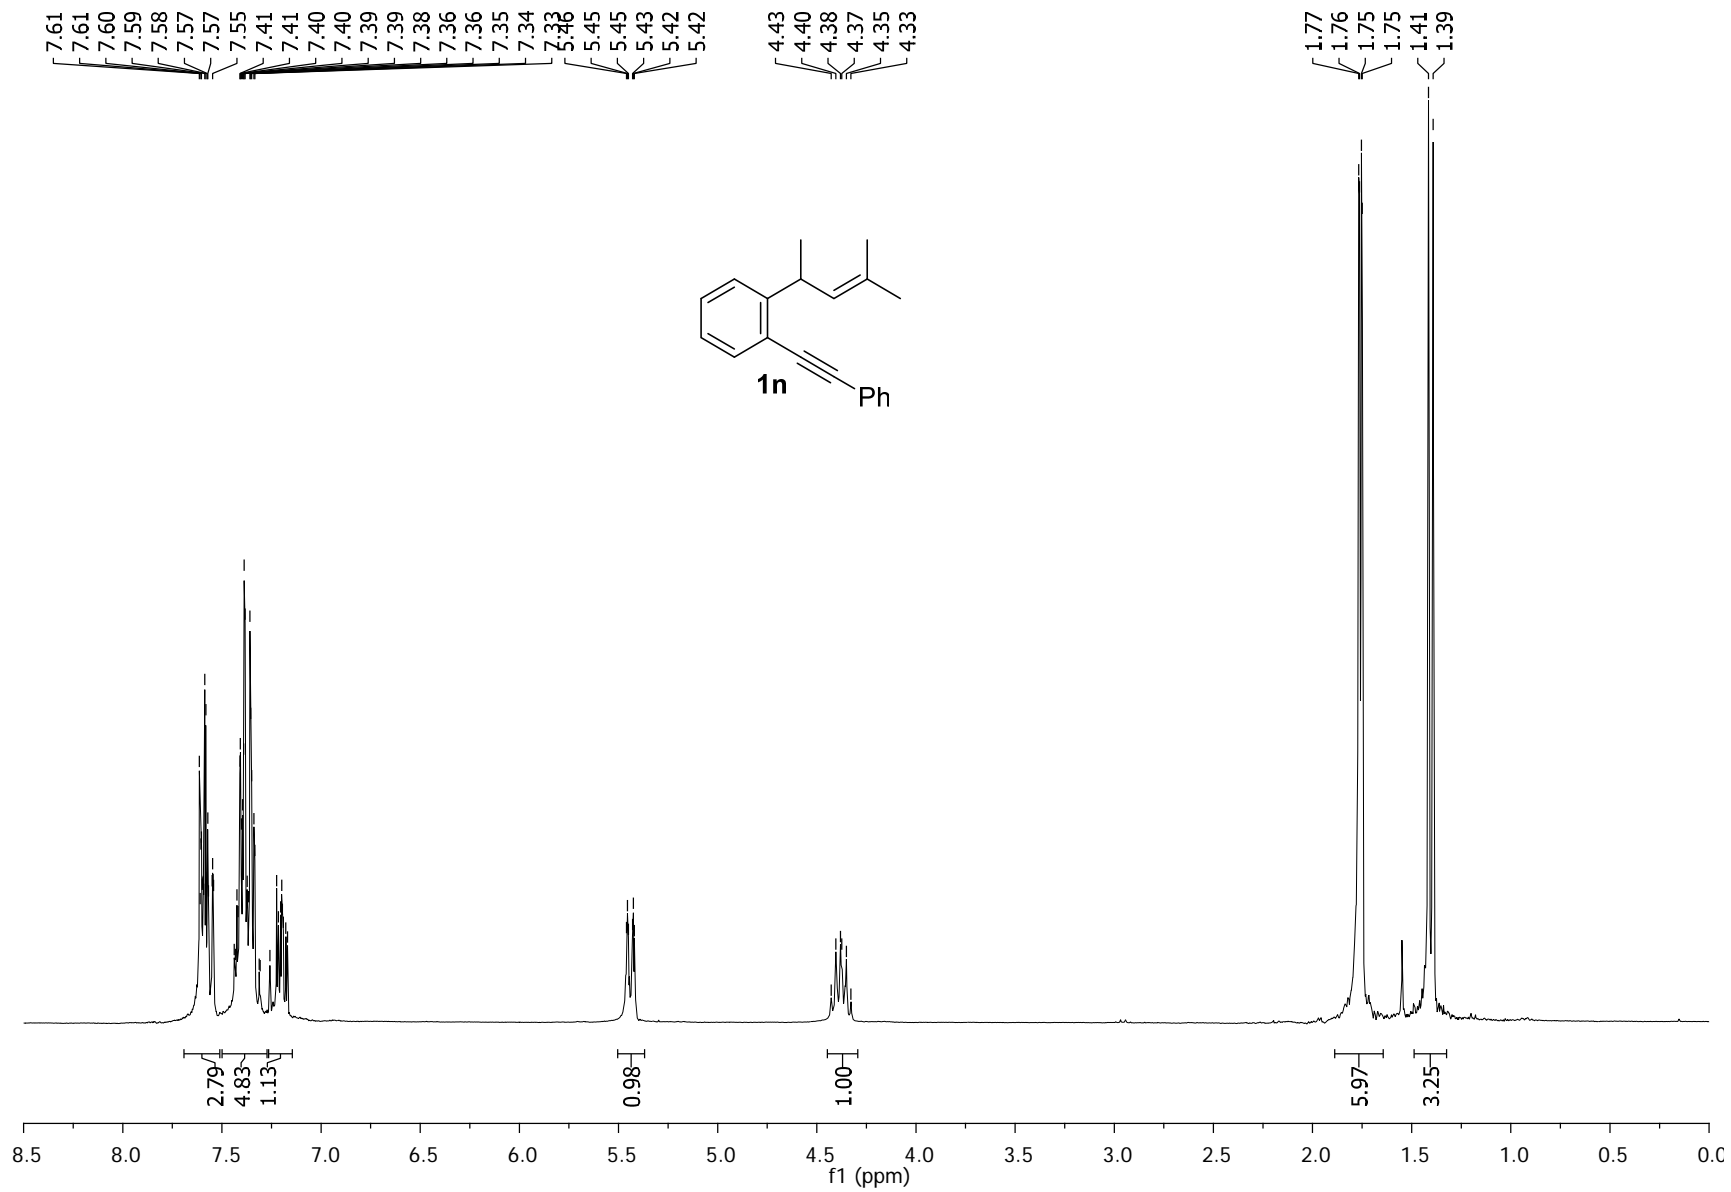

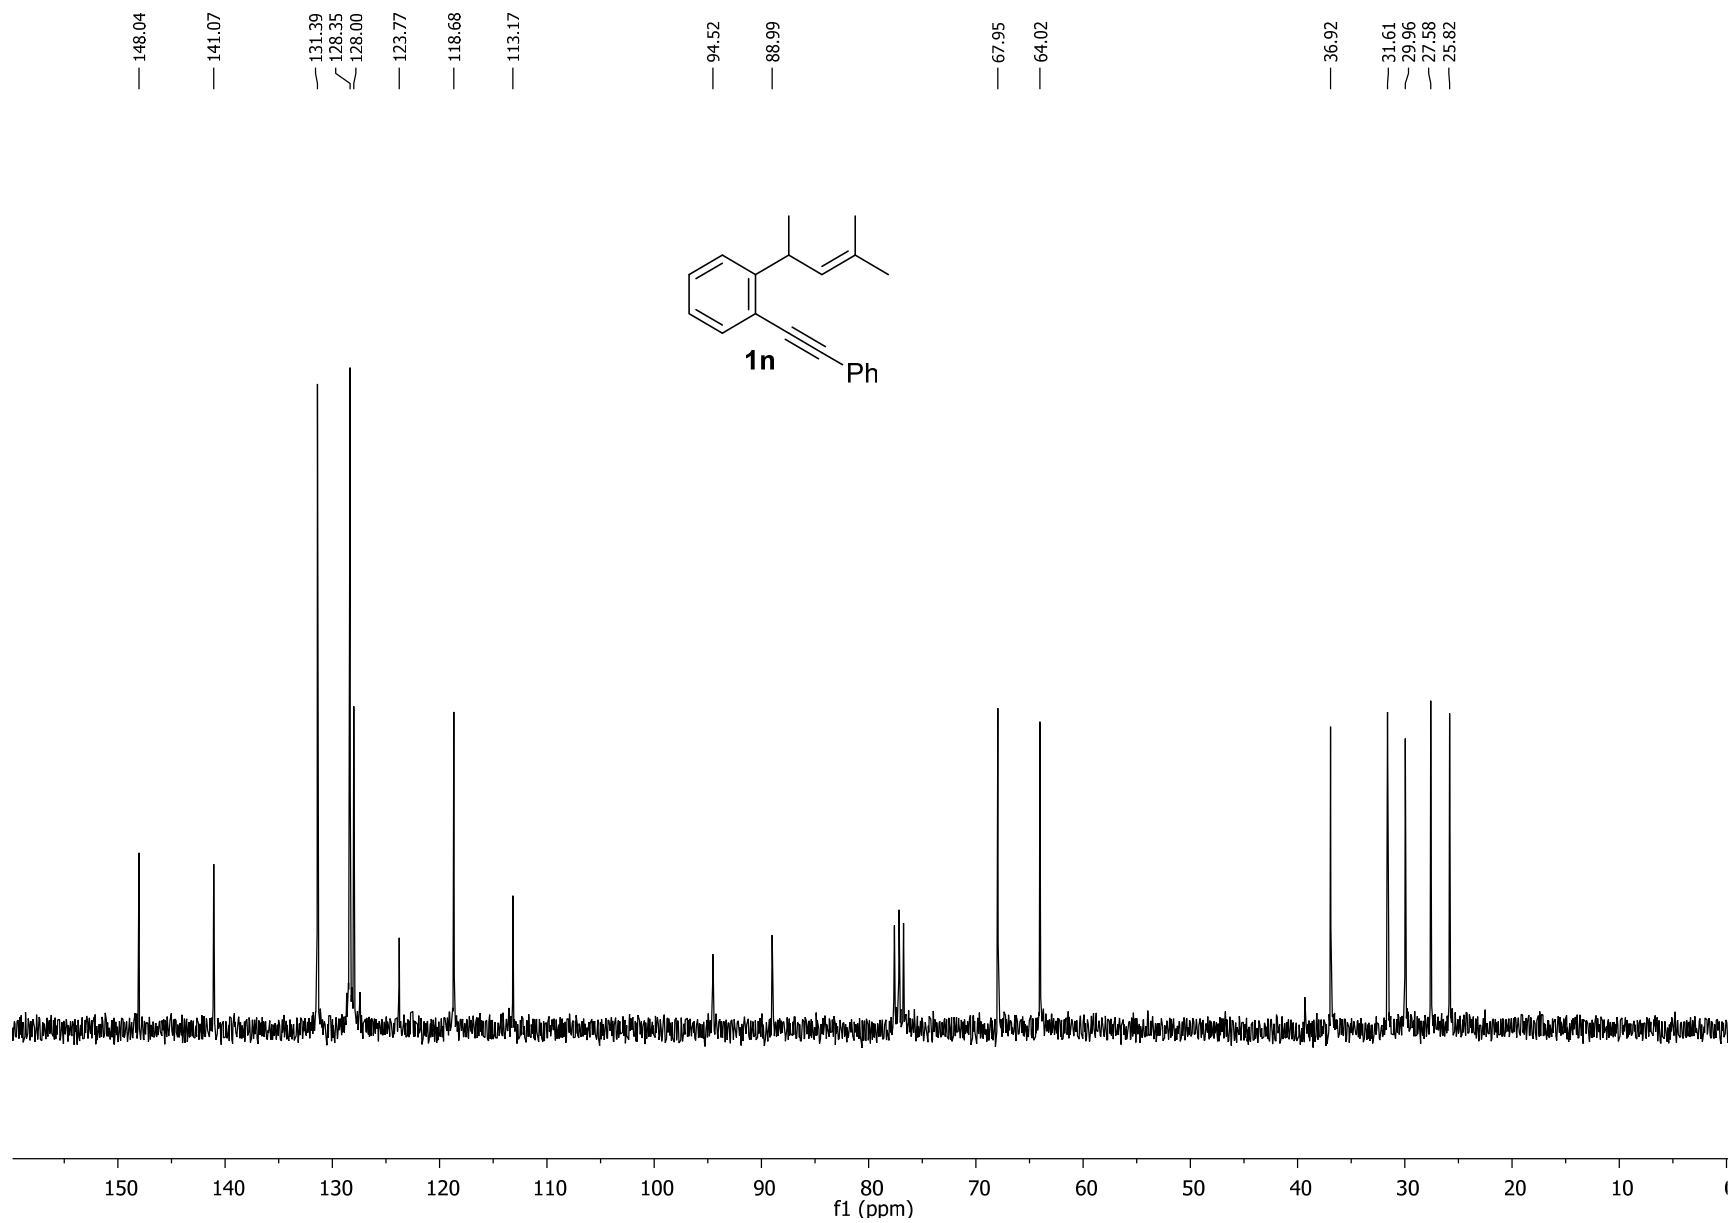

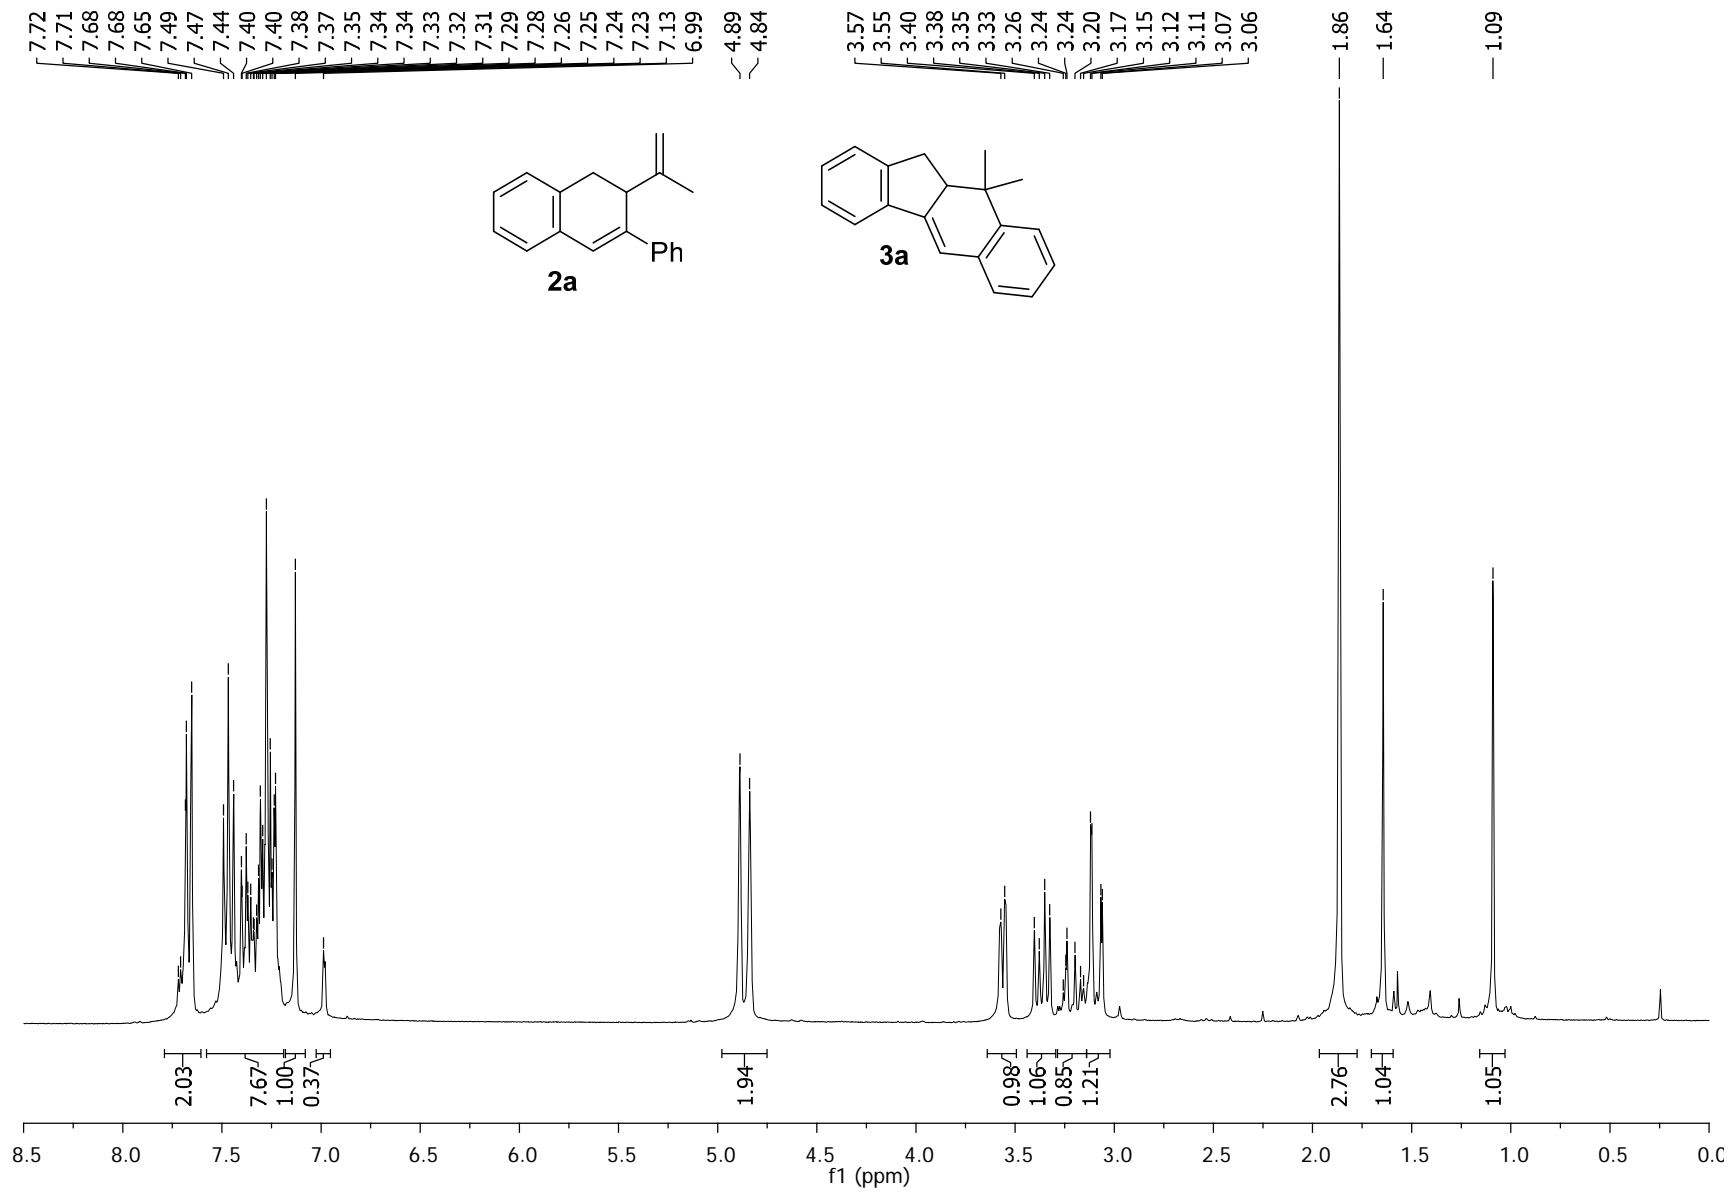

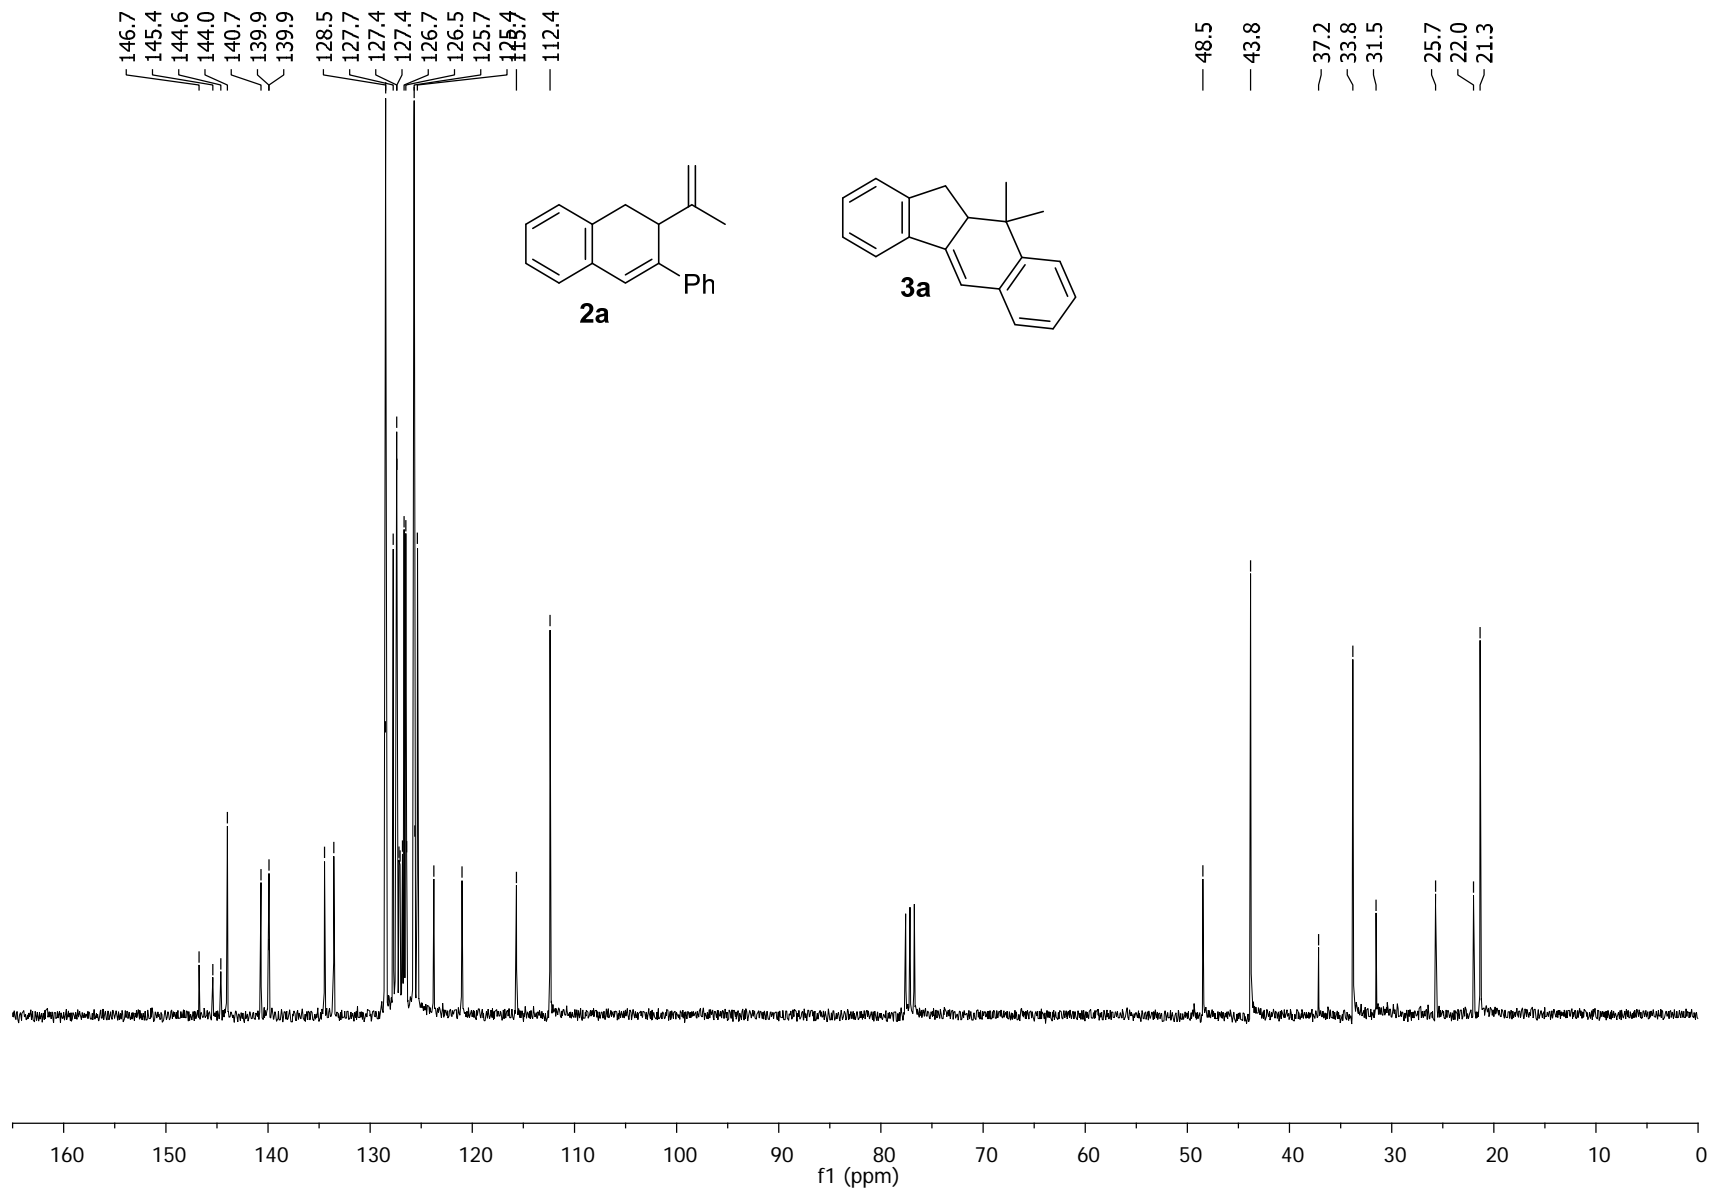

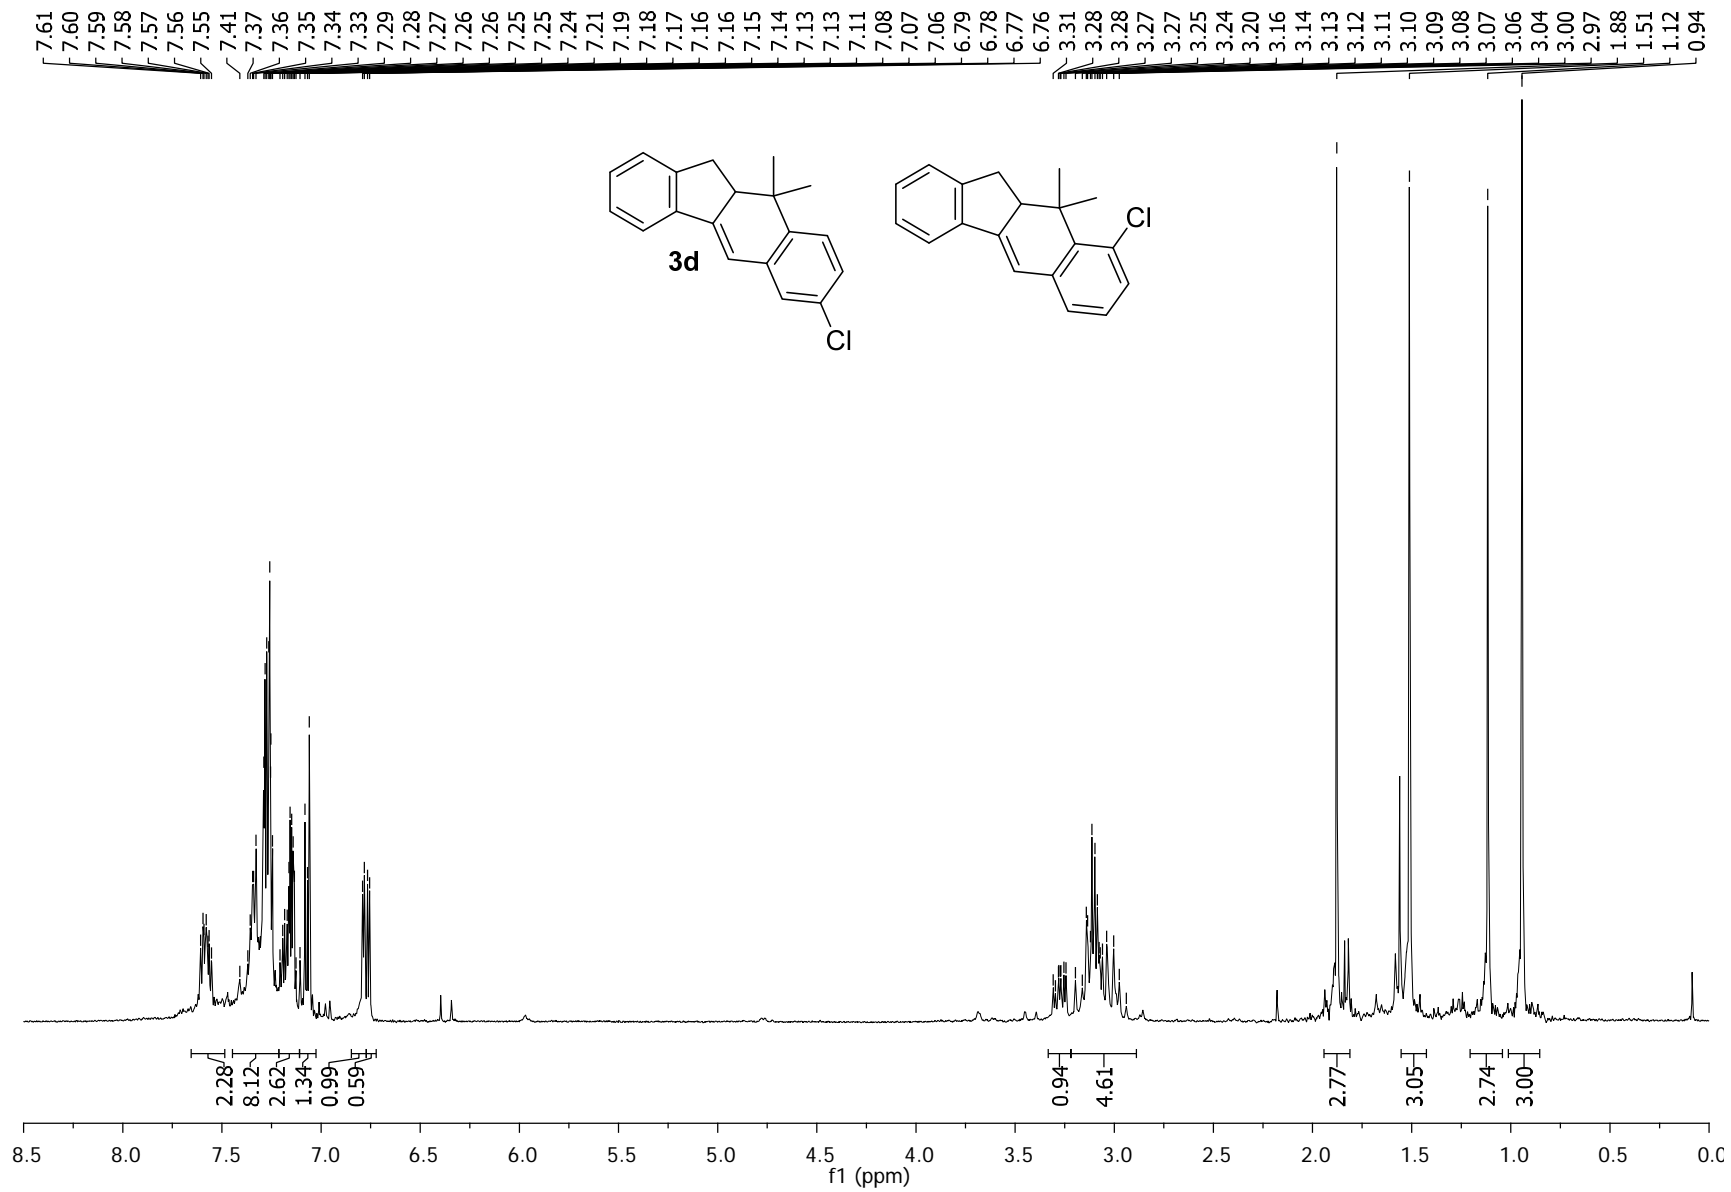

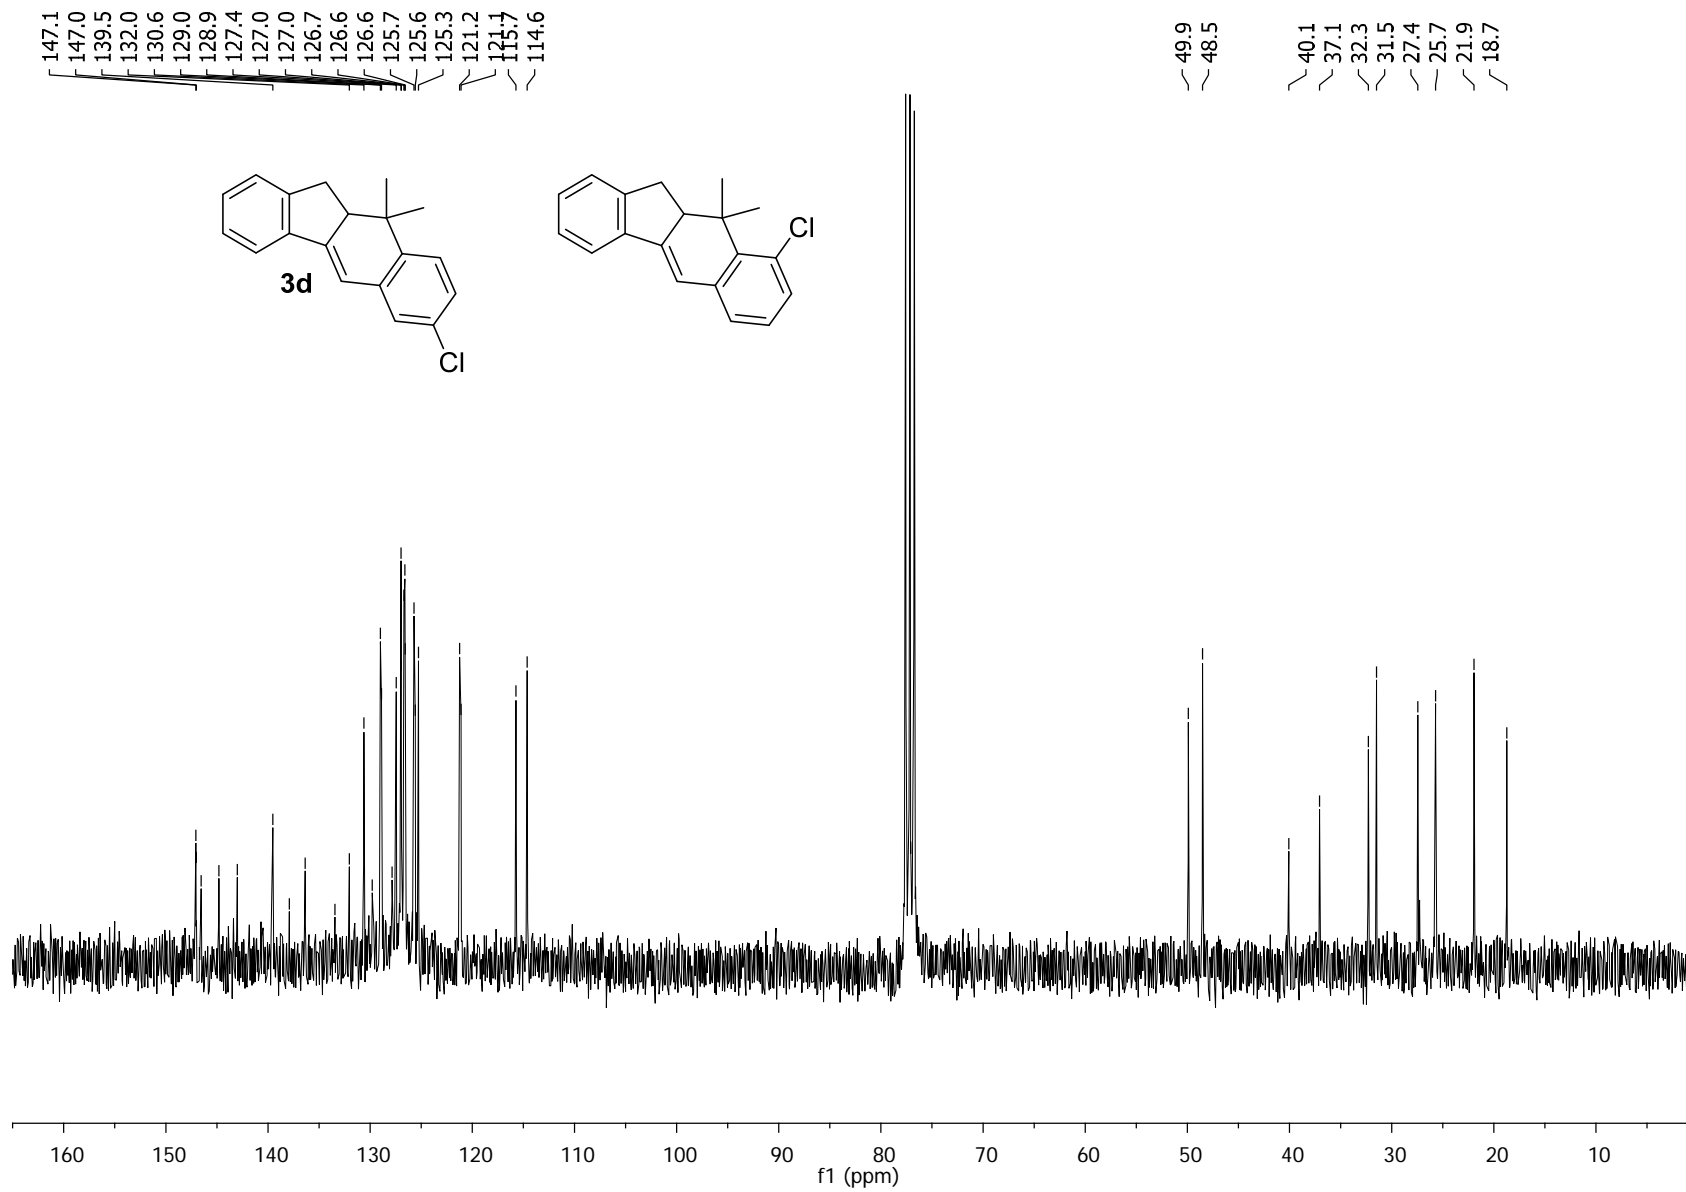

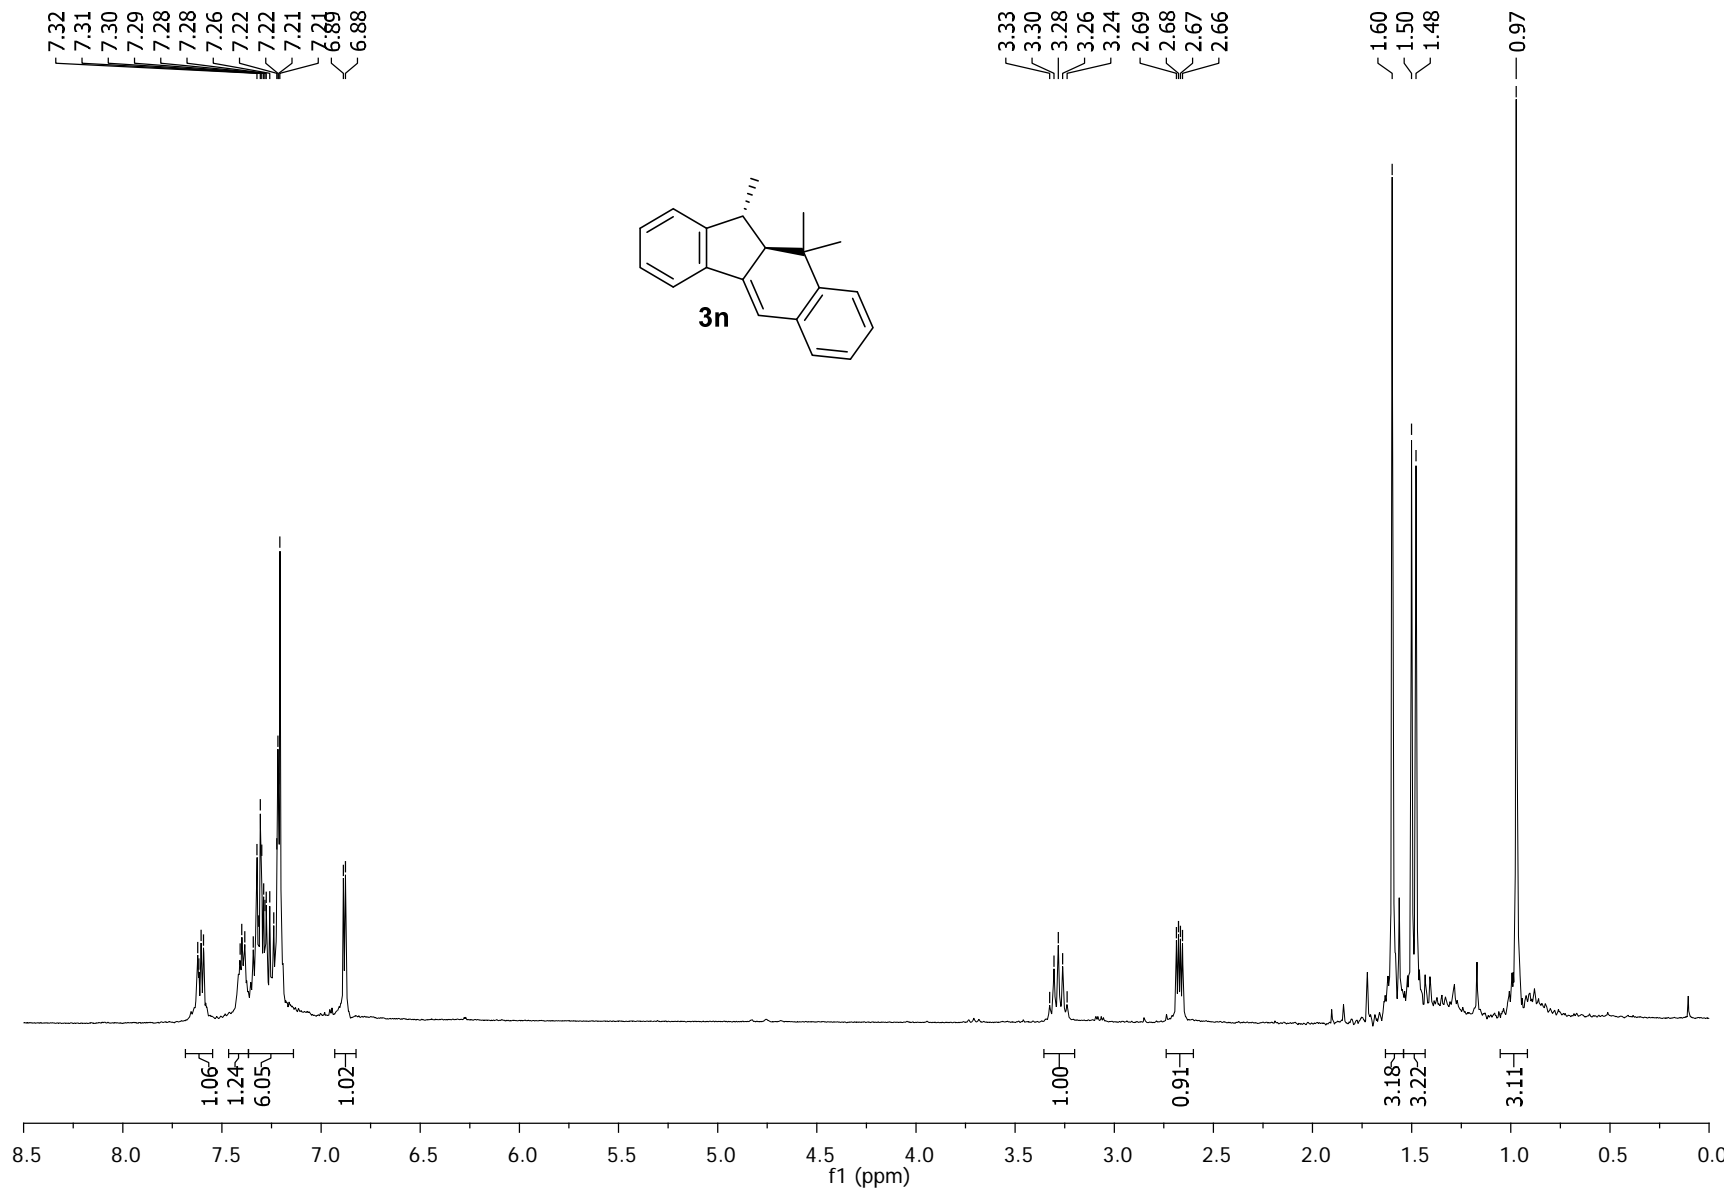

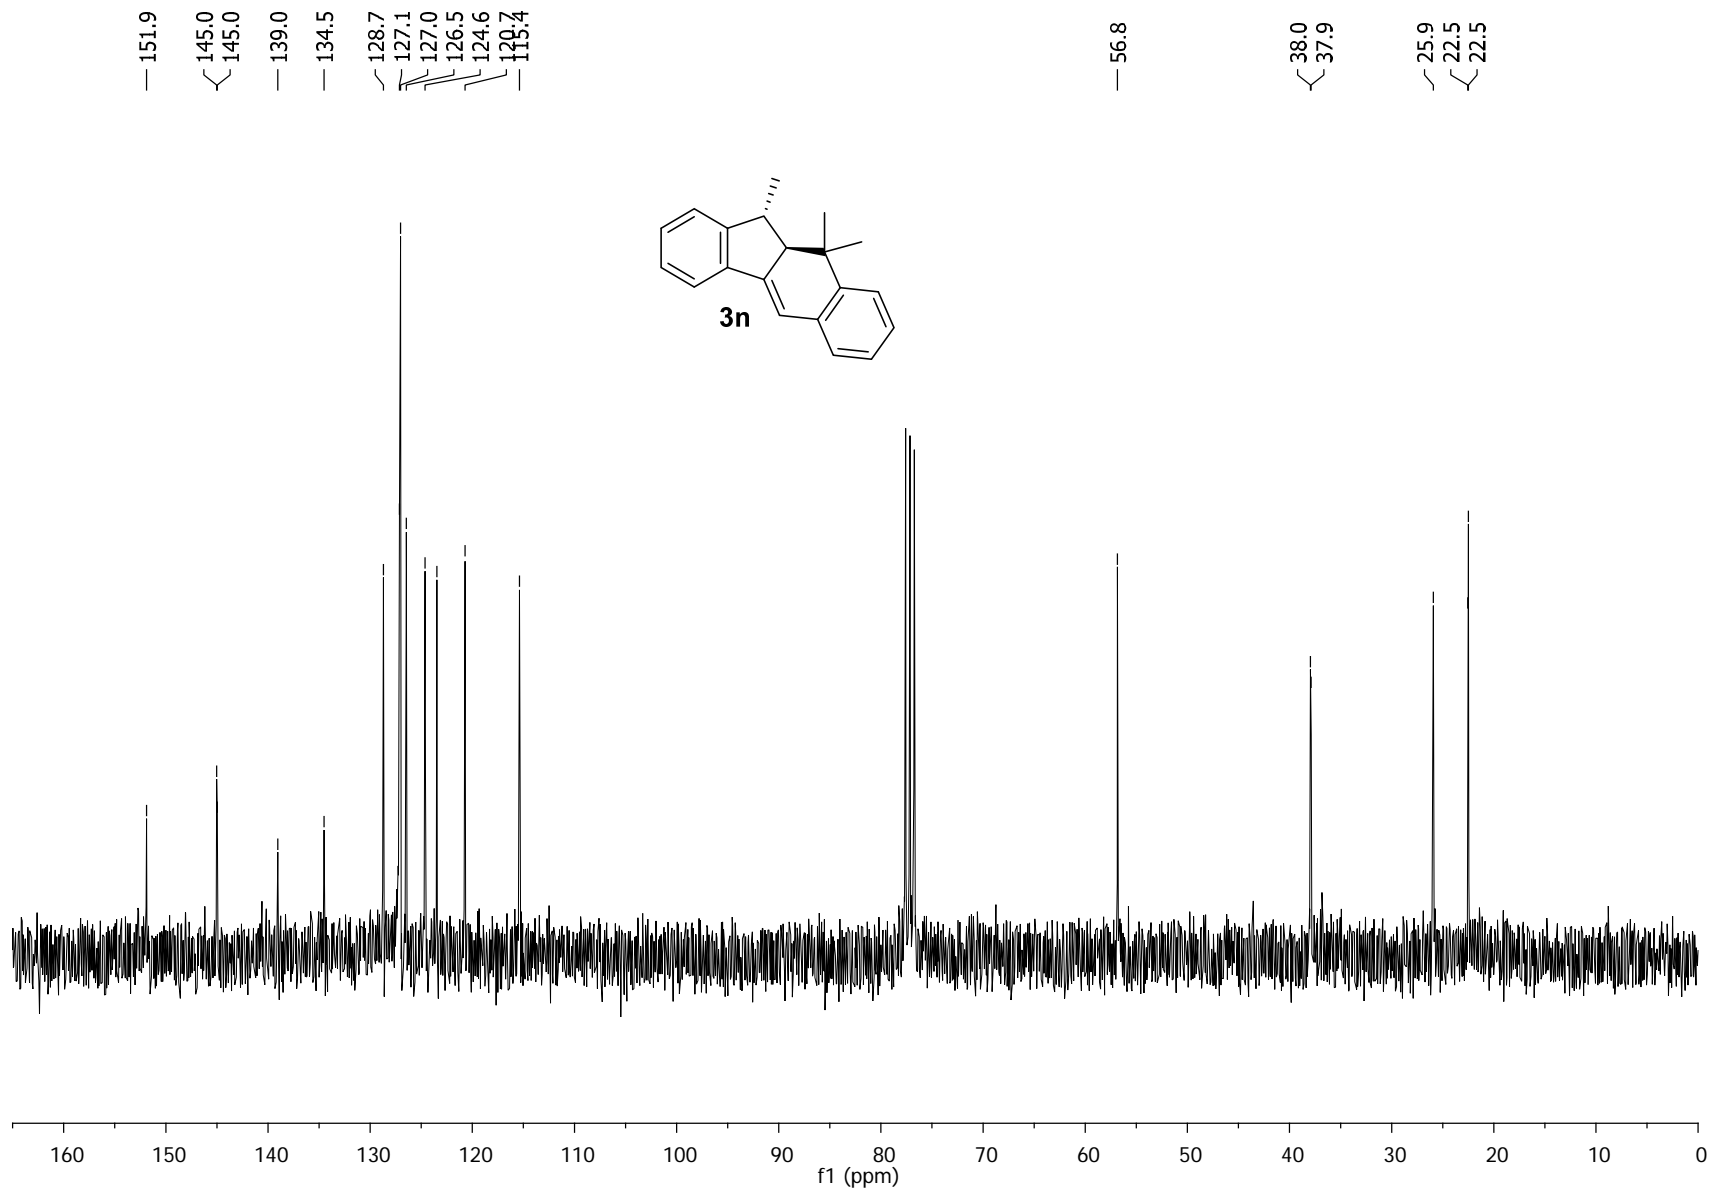



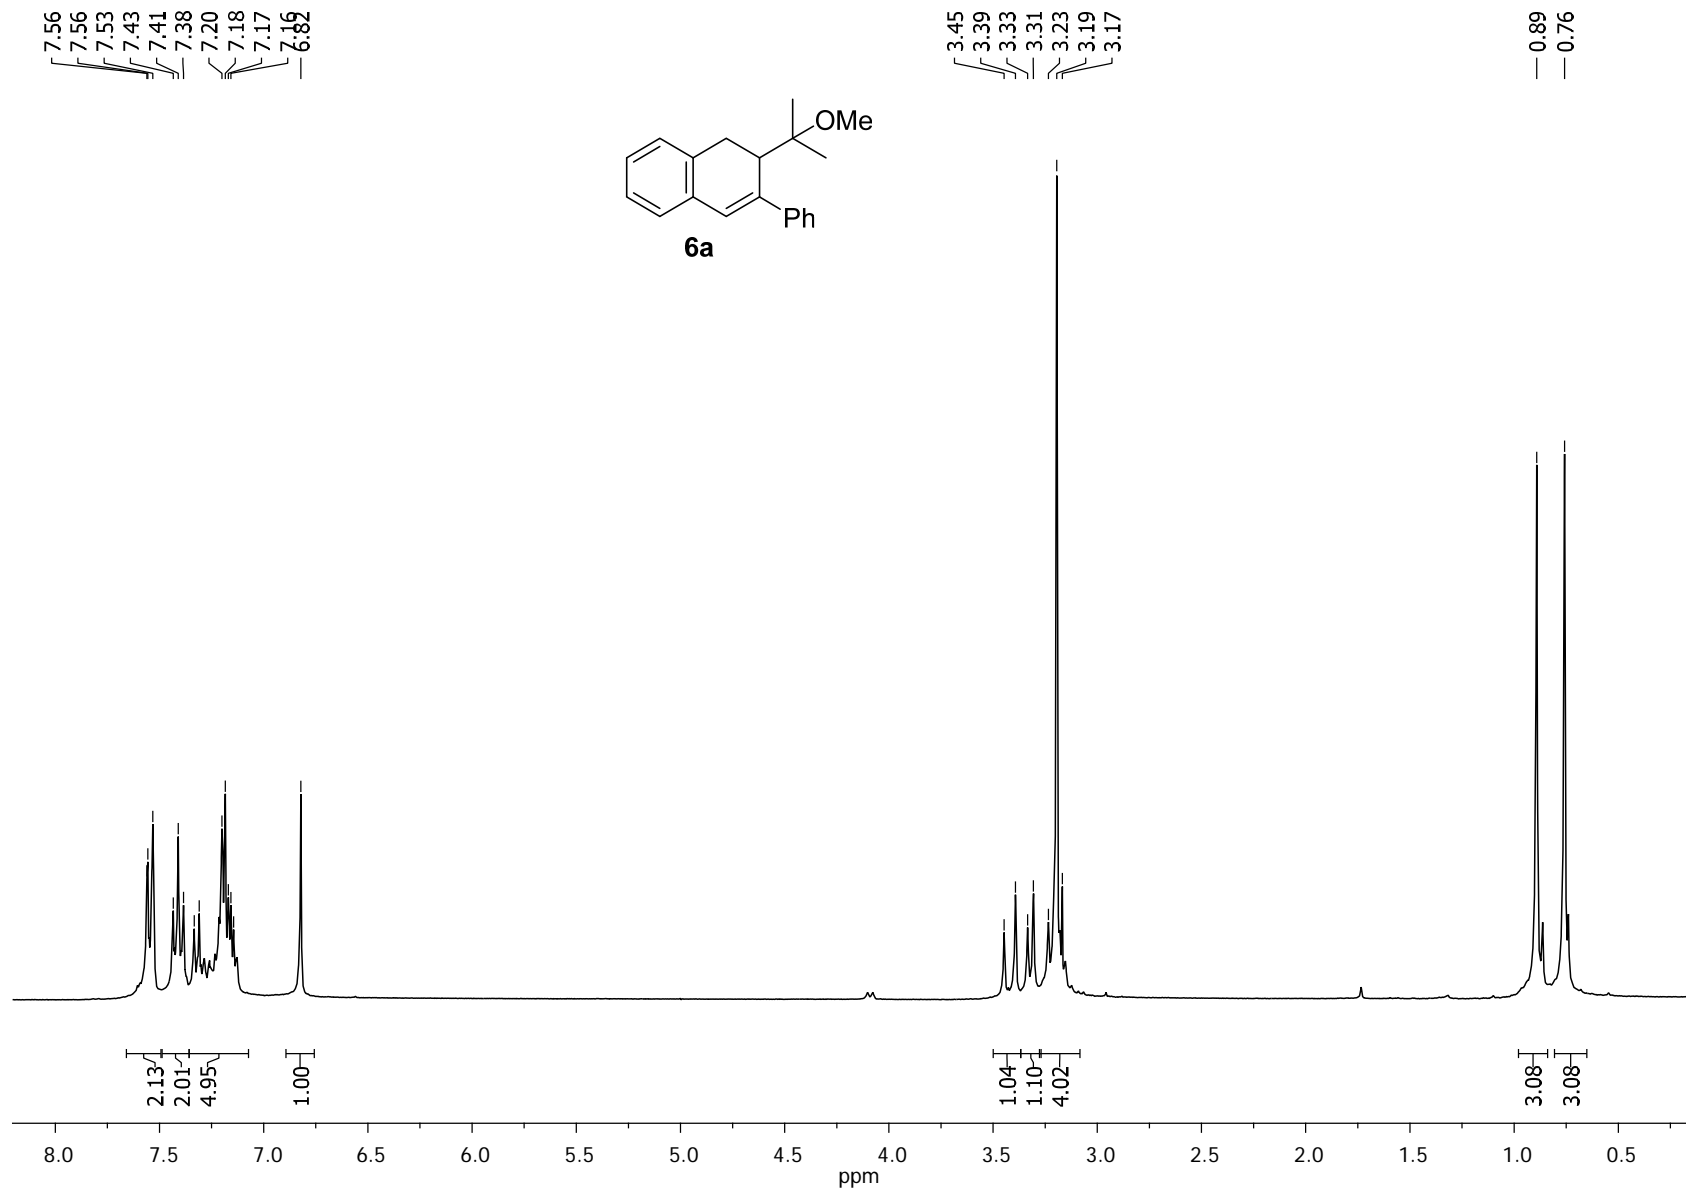

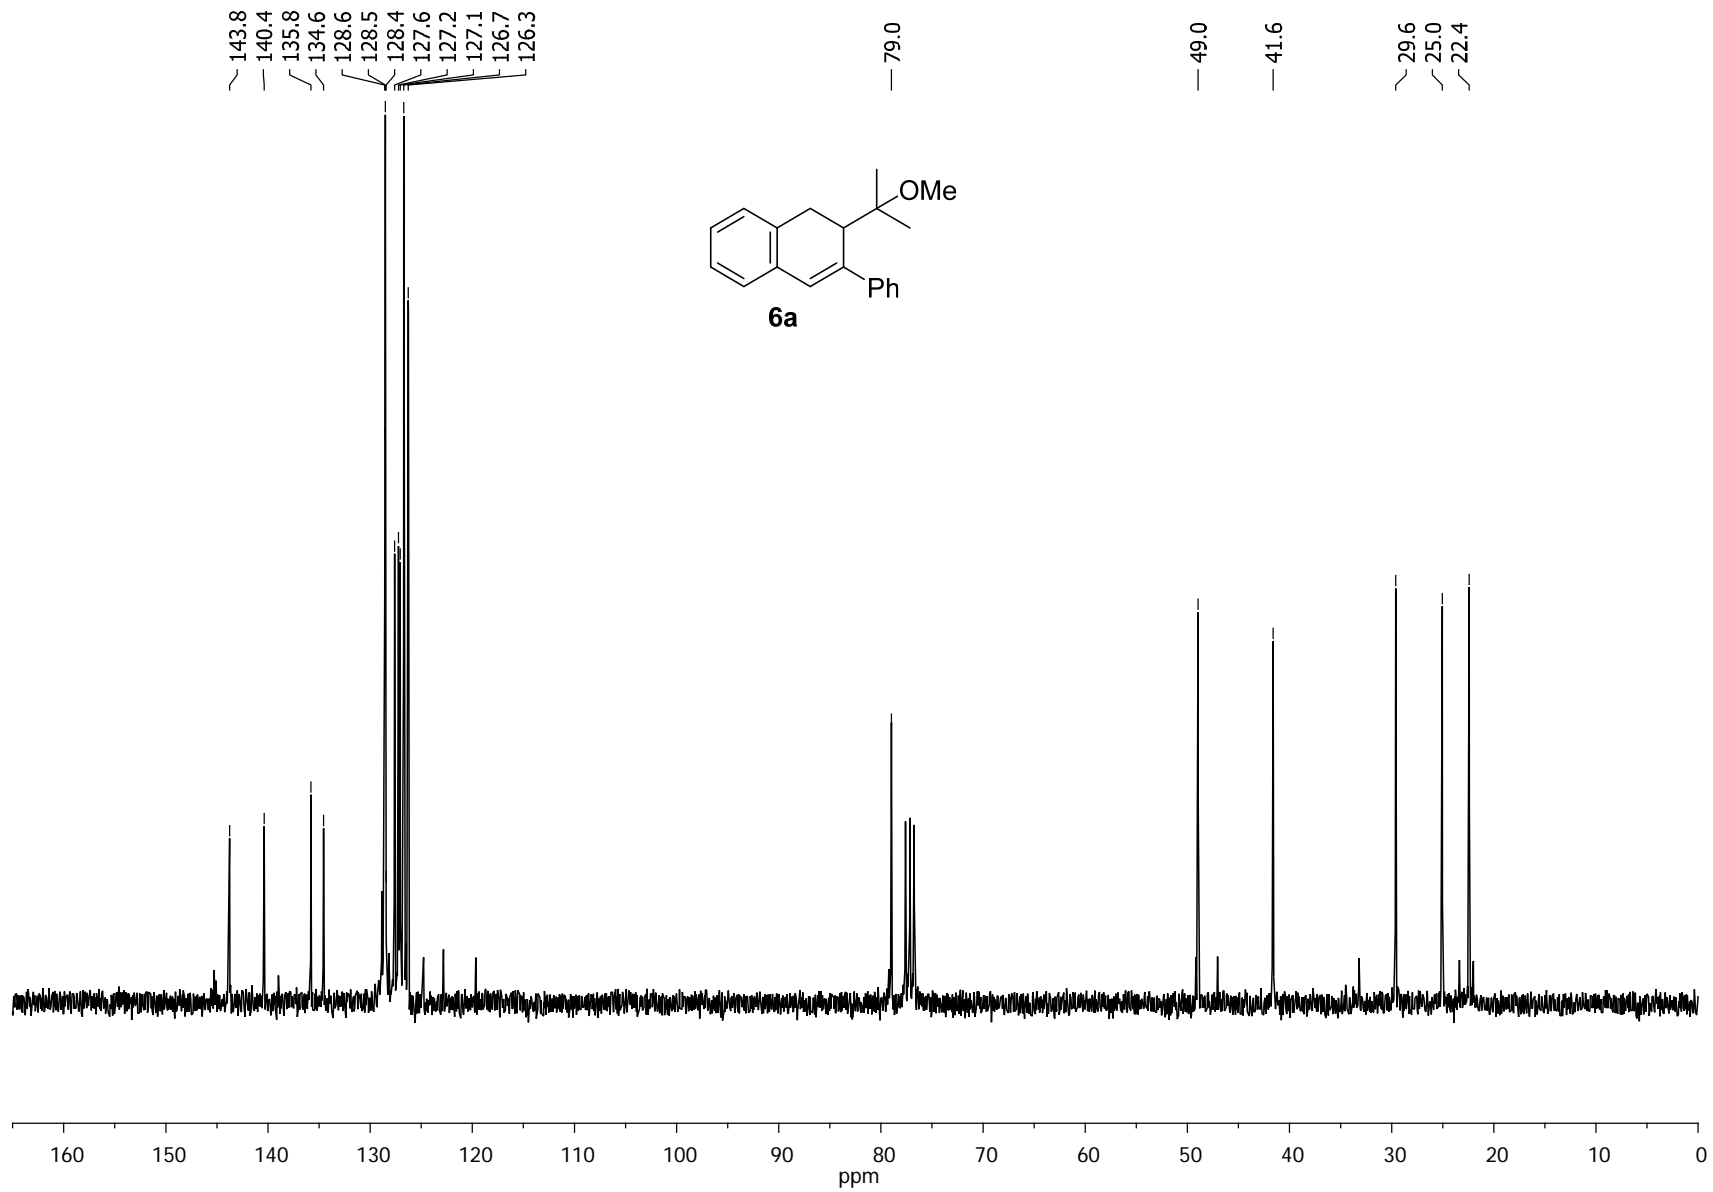

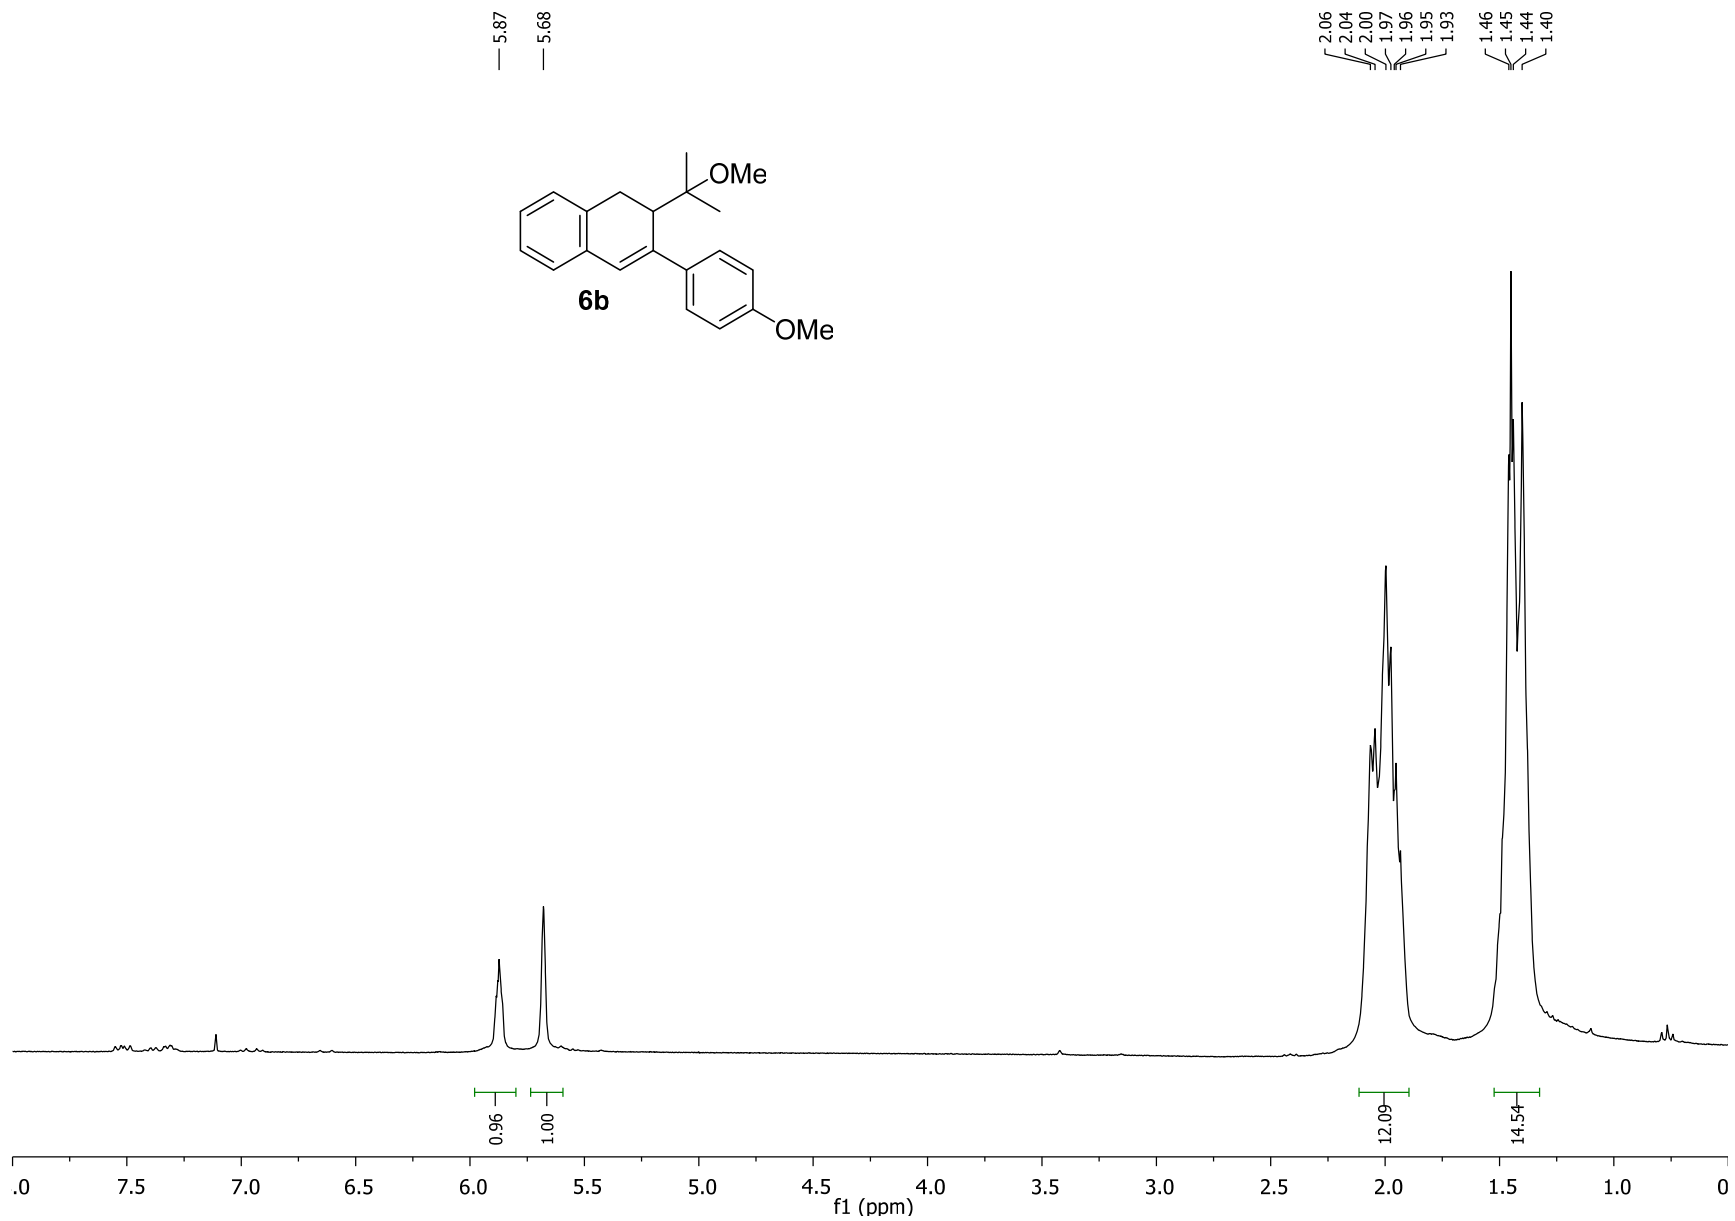

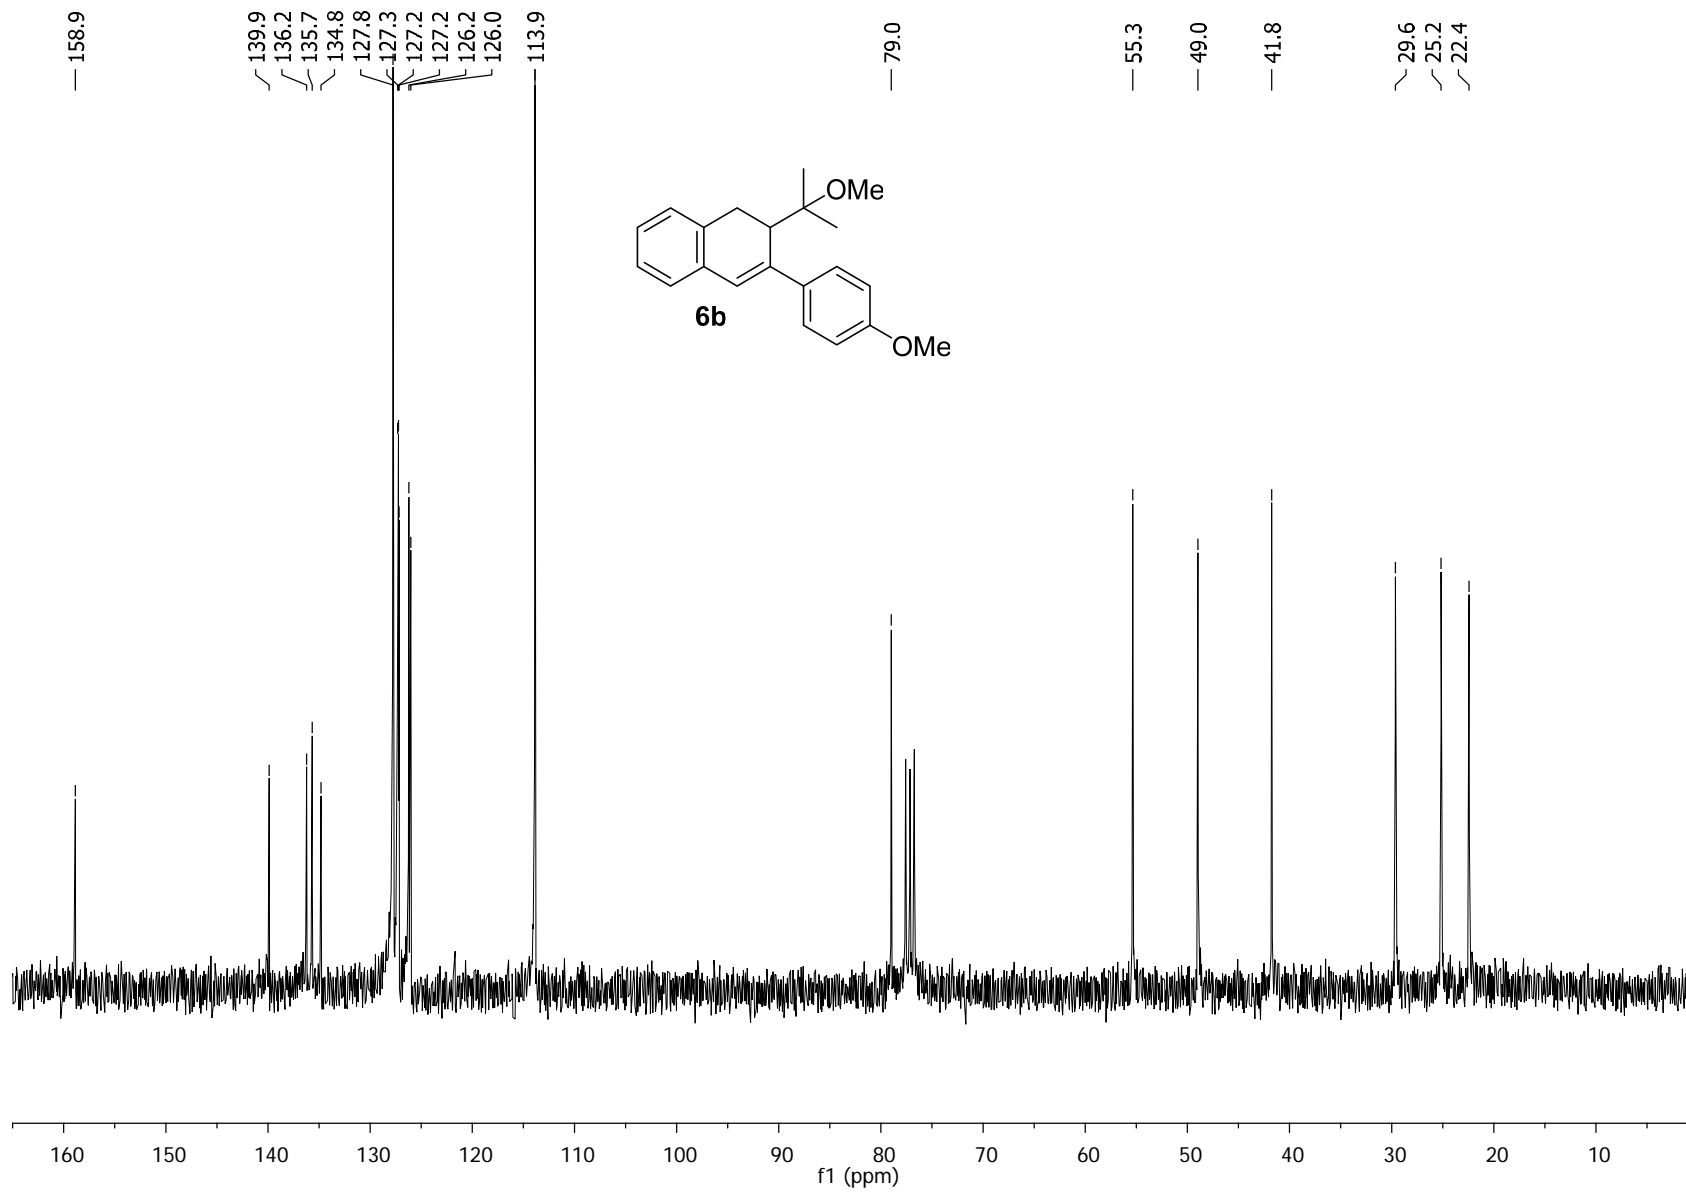

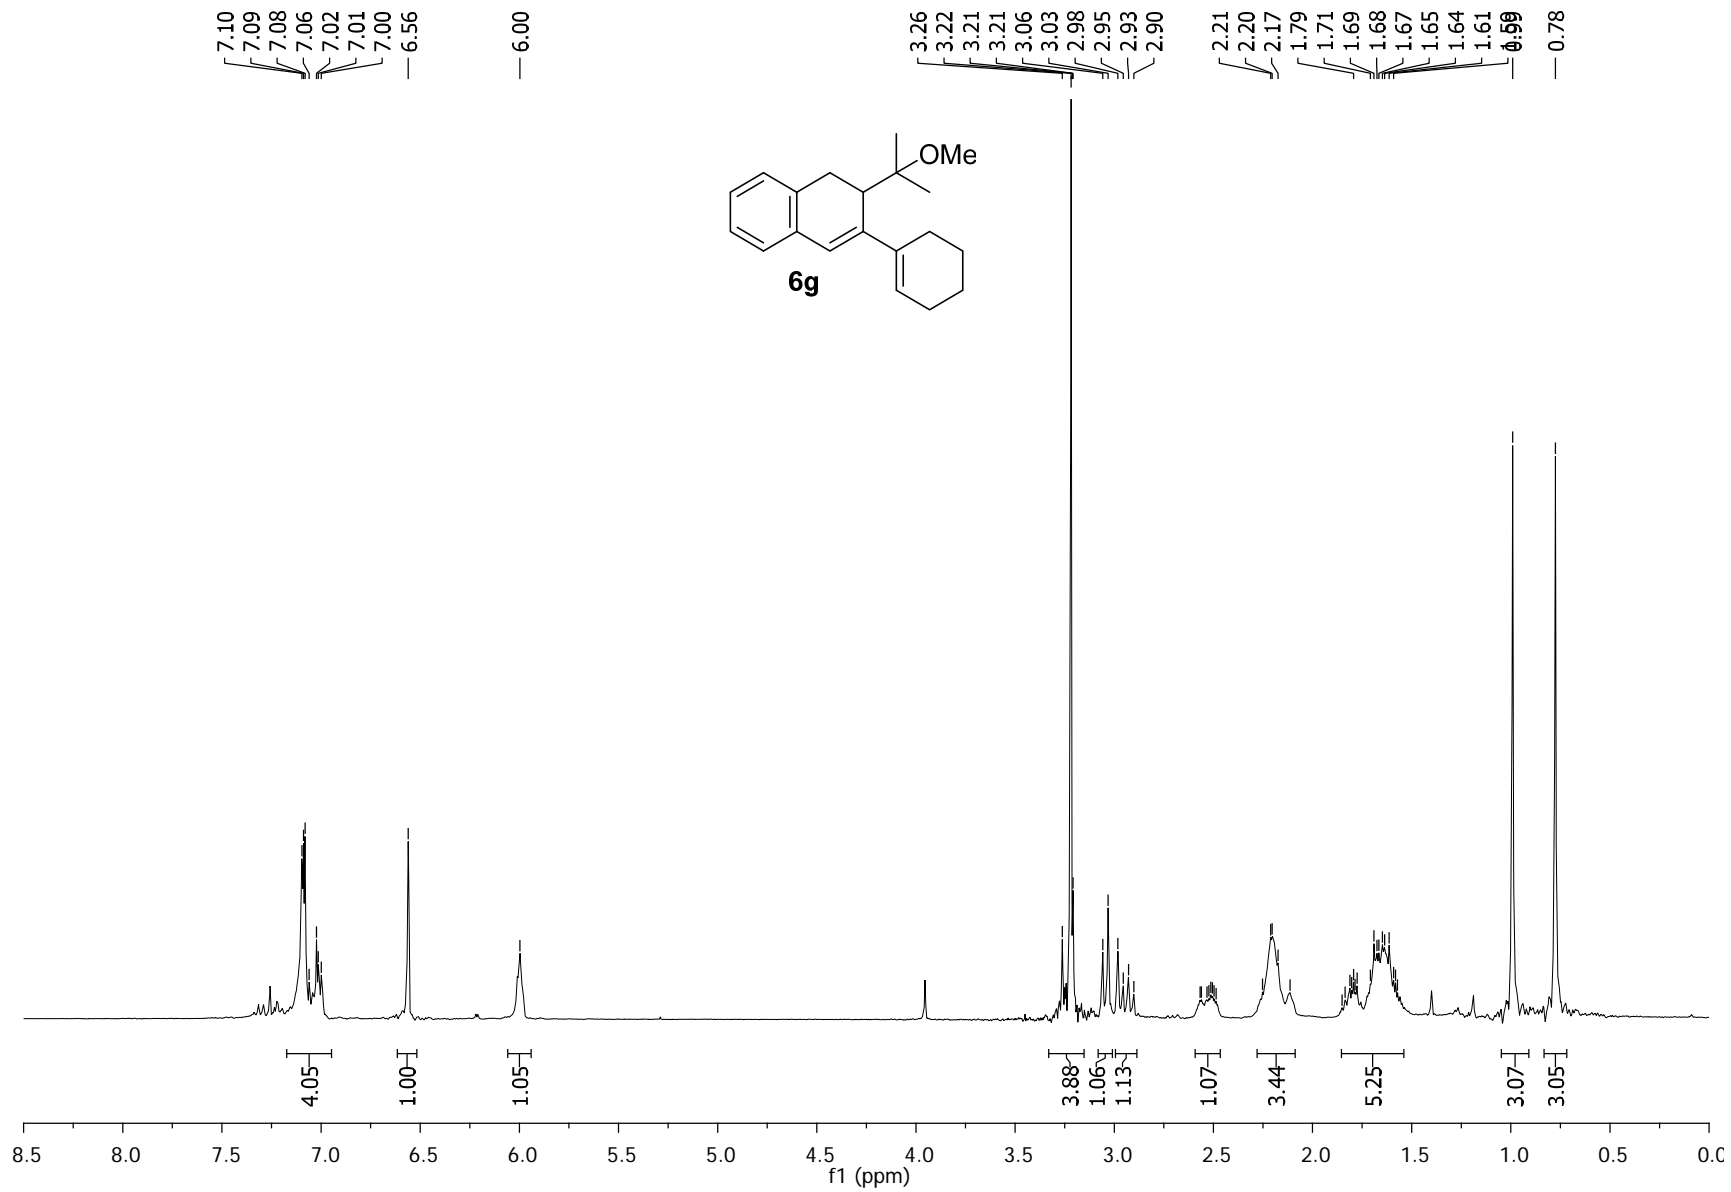

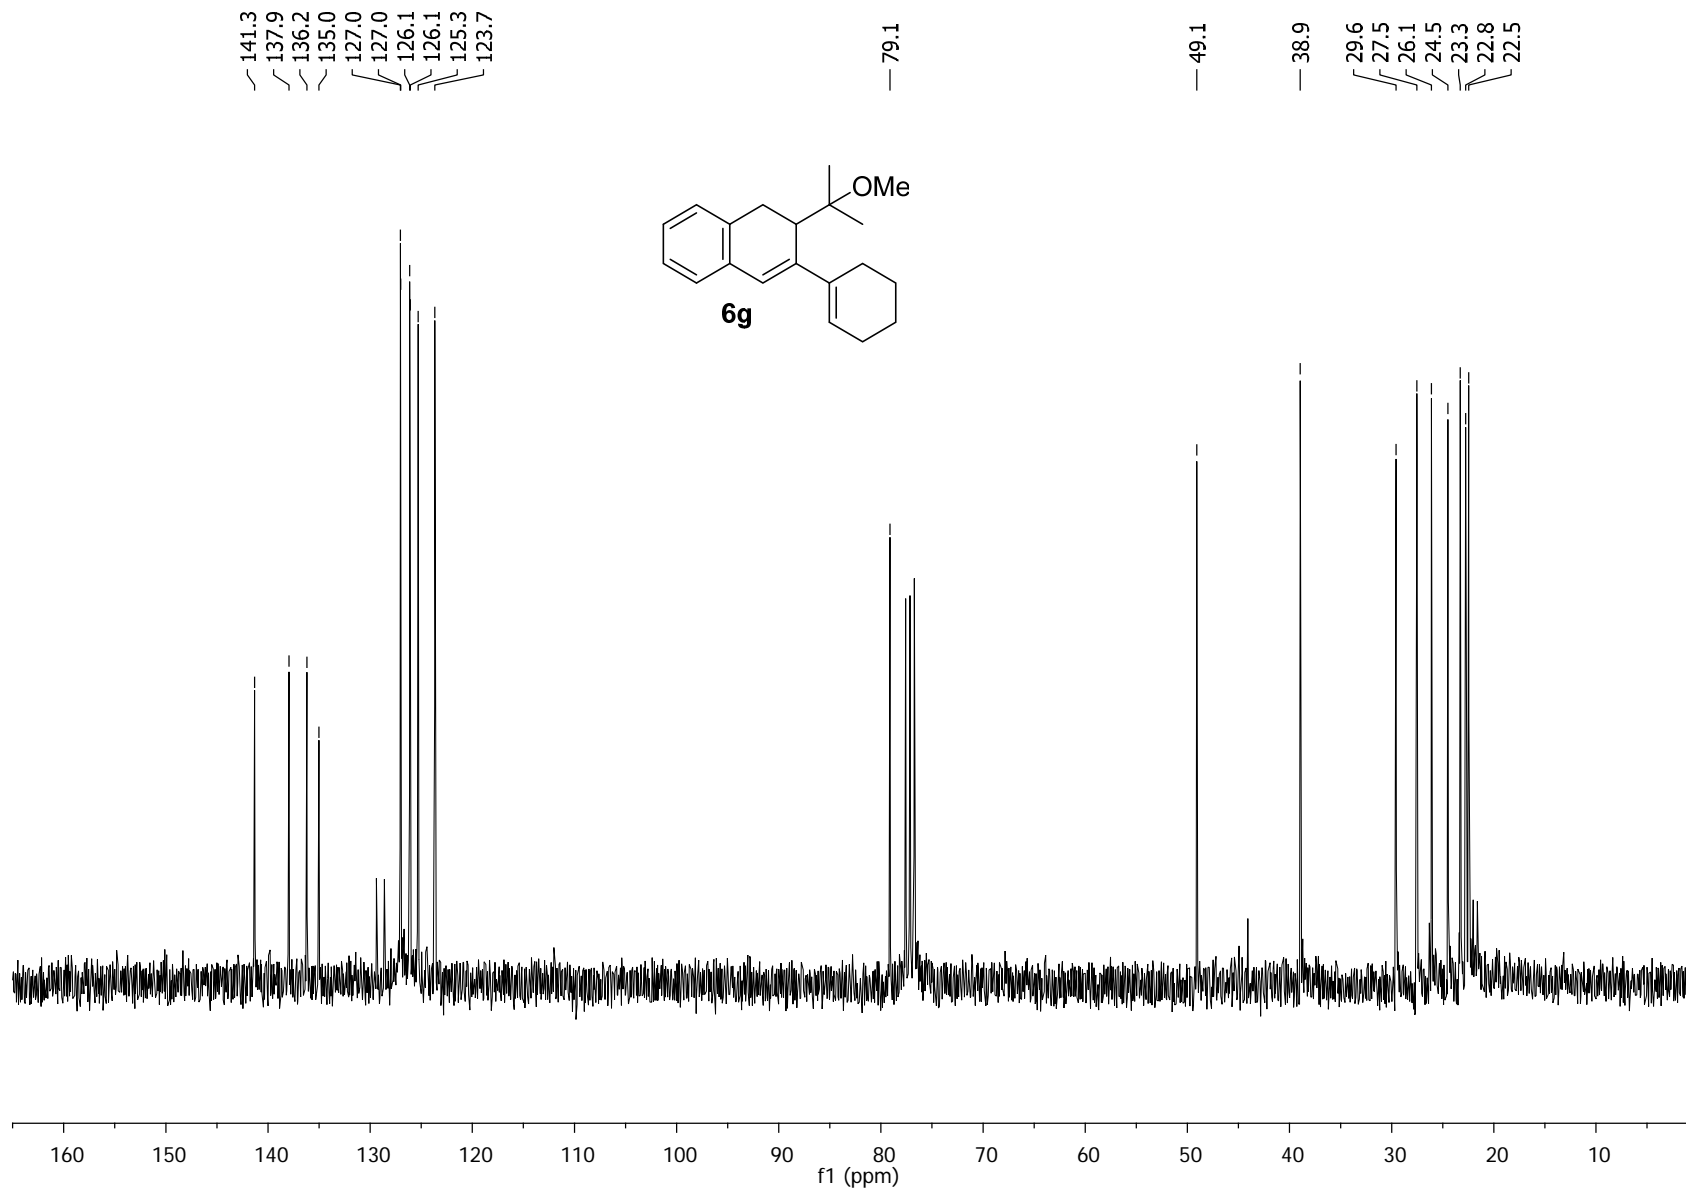

7.44  
7.44  
7.44  
7.43  
7.42  
7.42  
7.41  
7.41  
7.32  
7.31  
7.31  
7.31  
7.30  
7.30  
7.29  
7.29  
7.29  
6.08  
6.08

2.37  
2.36  
2.26  
2.24  
2.21  
2.20  
2.19  
2.17  
2.15  
2.12  
1.86  
1.81  
1.70  
1.69  
1.68  
1.68  
1.14  
1.12  
1.09  
1.09  
1.06  
1.04

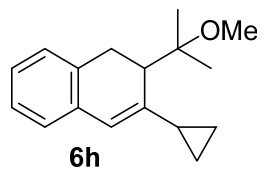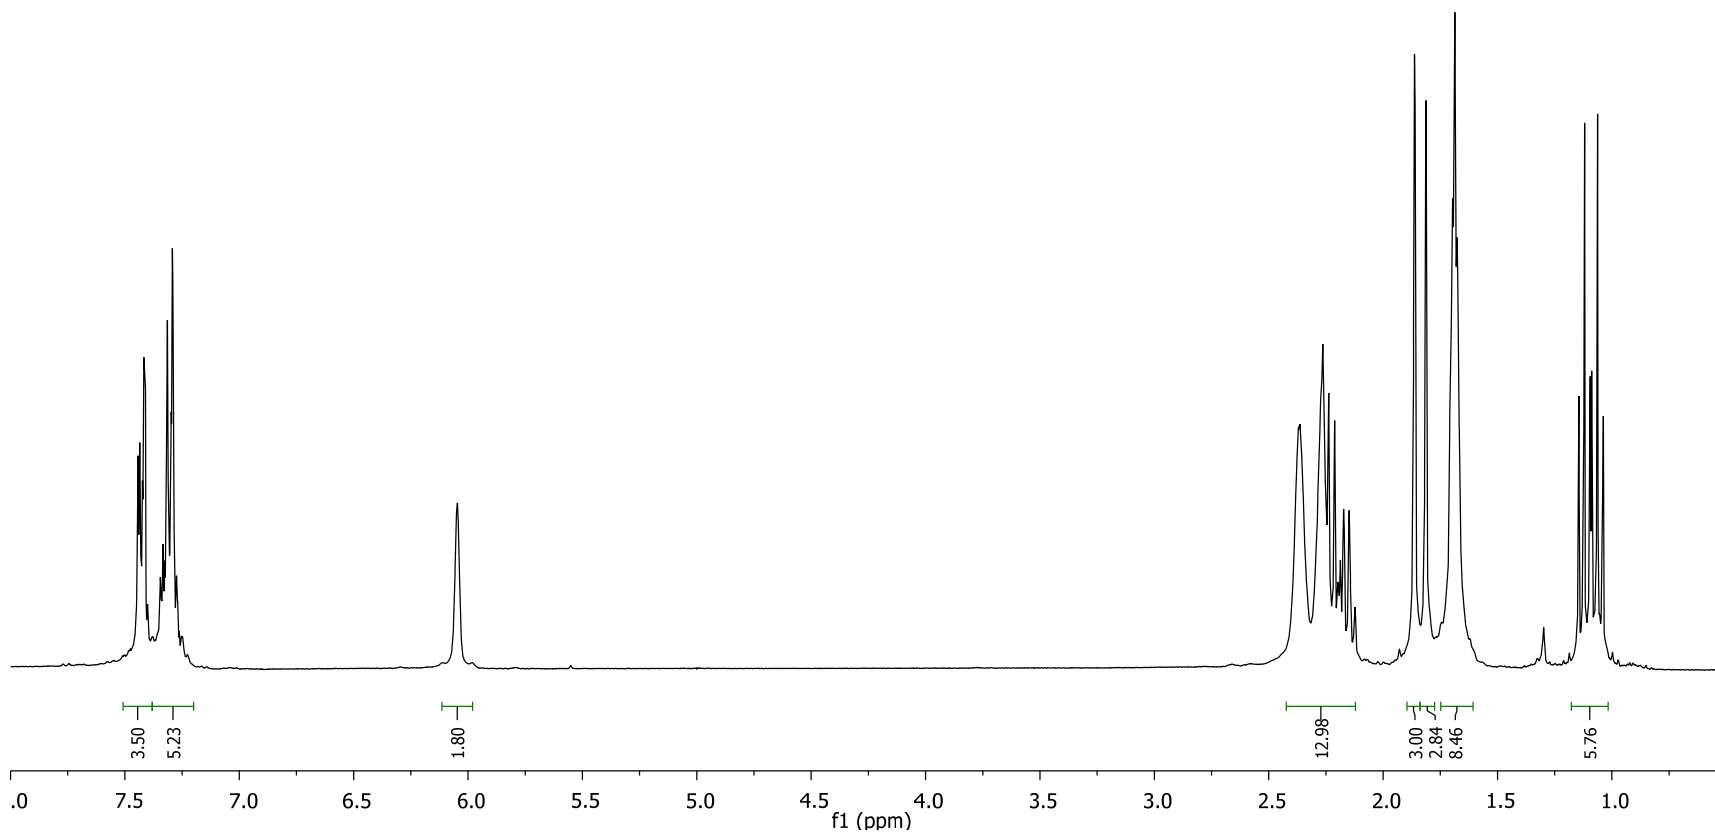

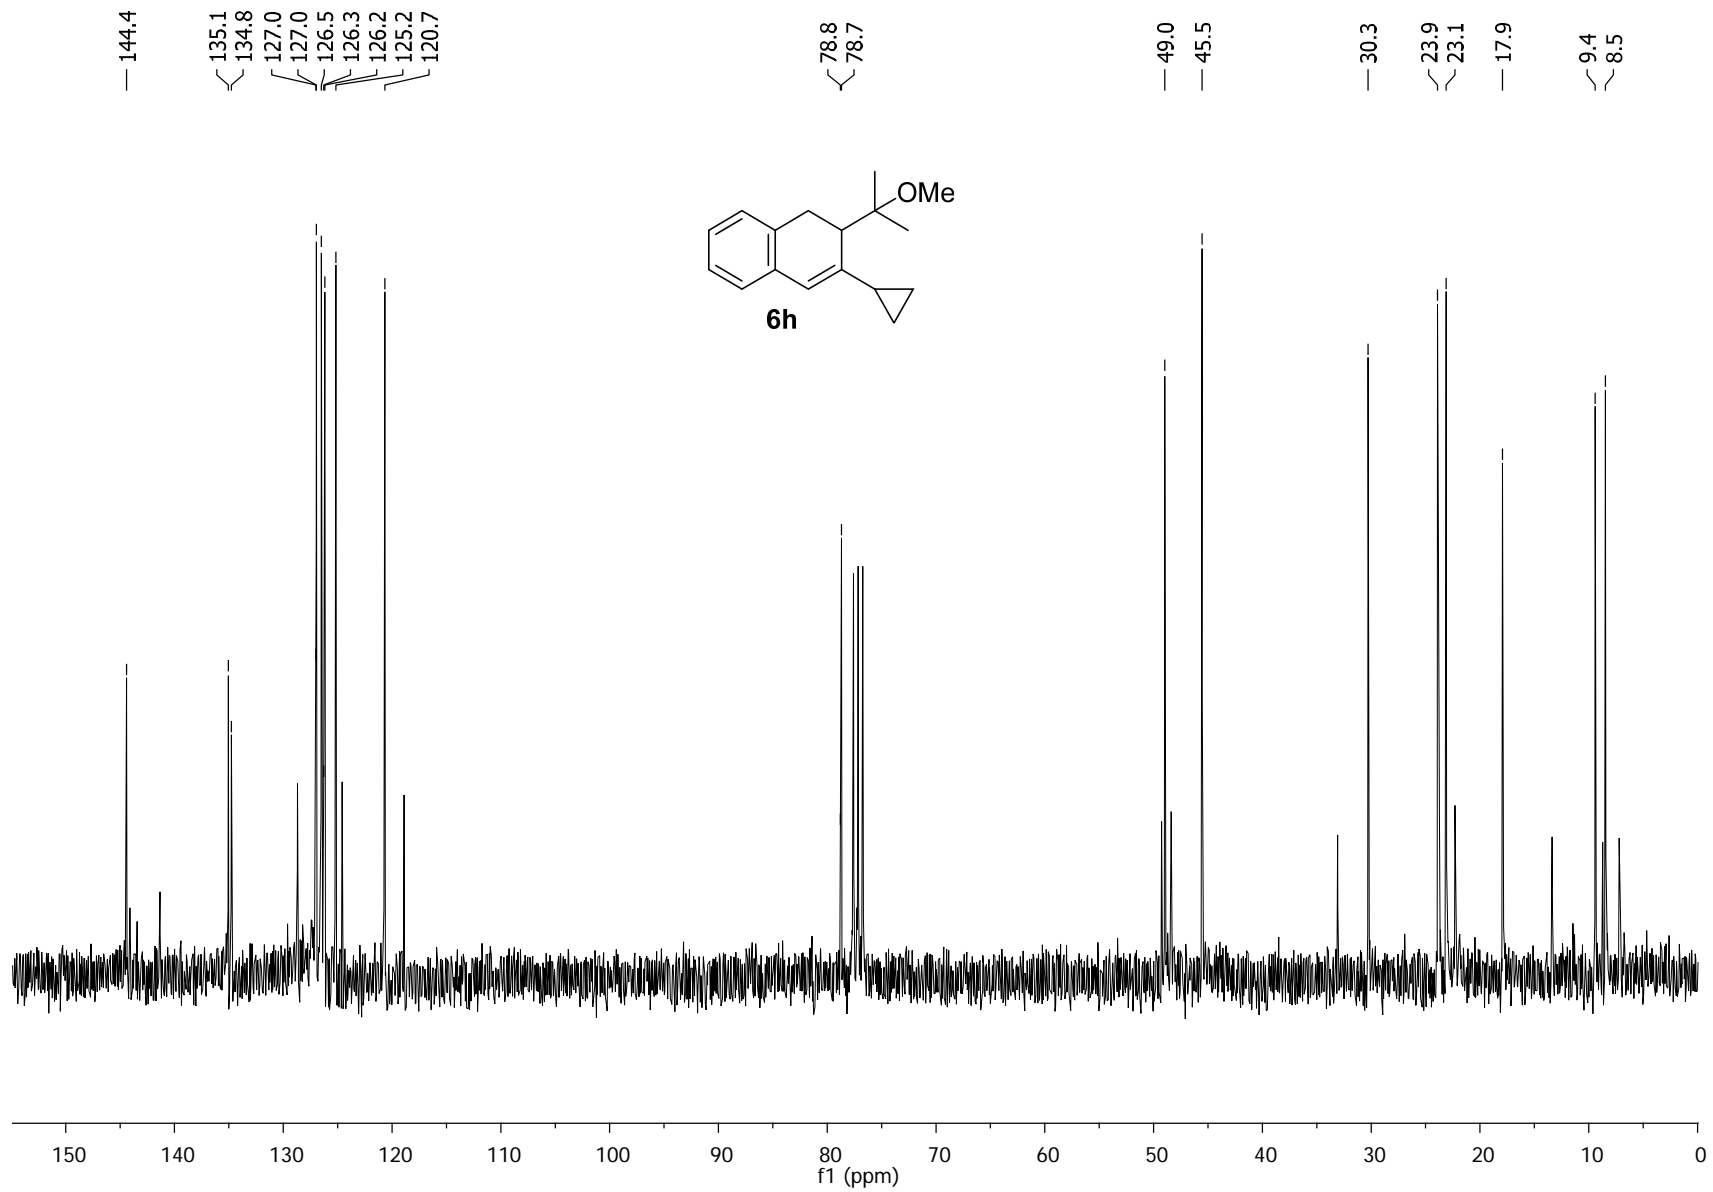



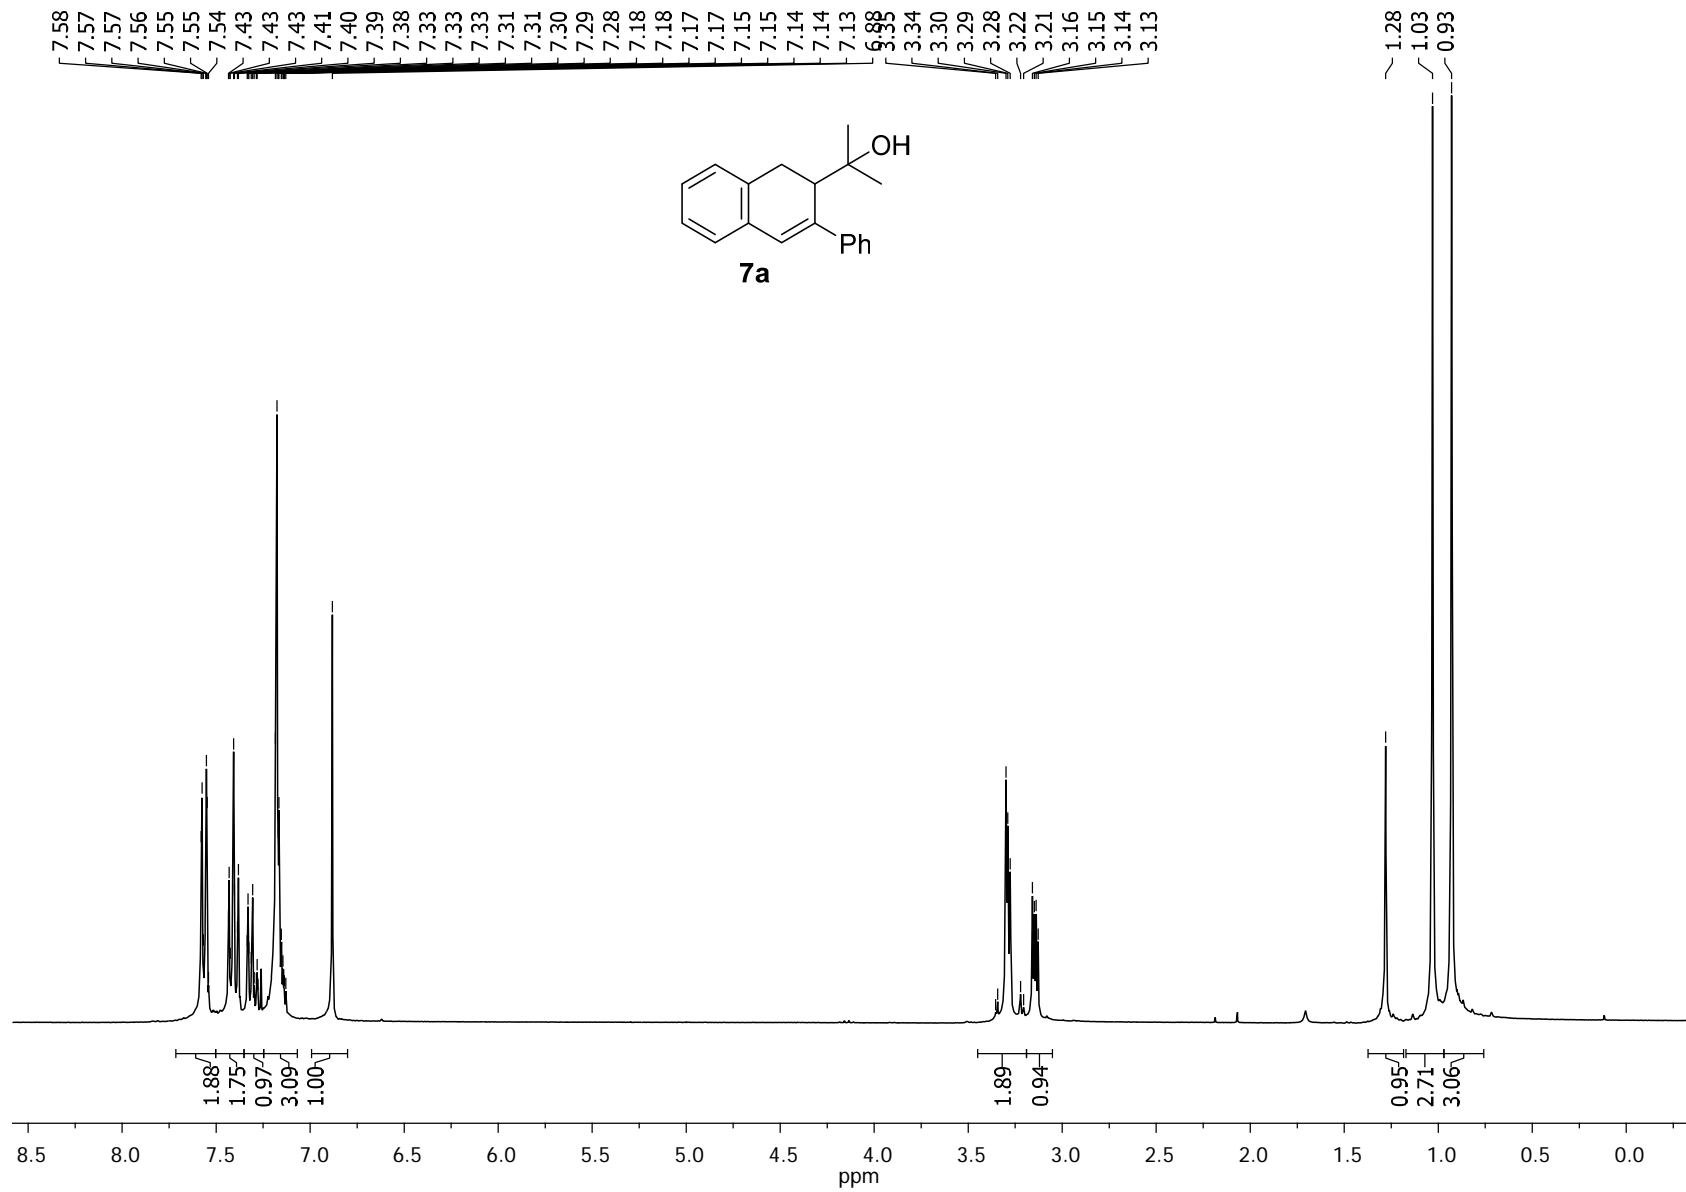

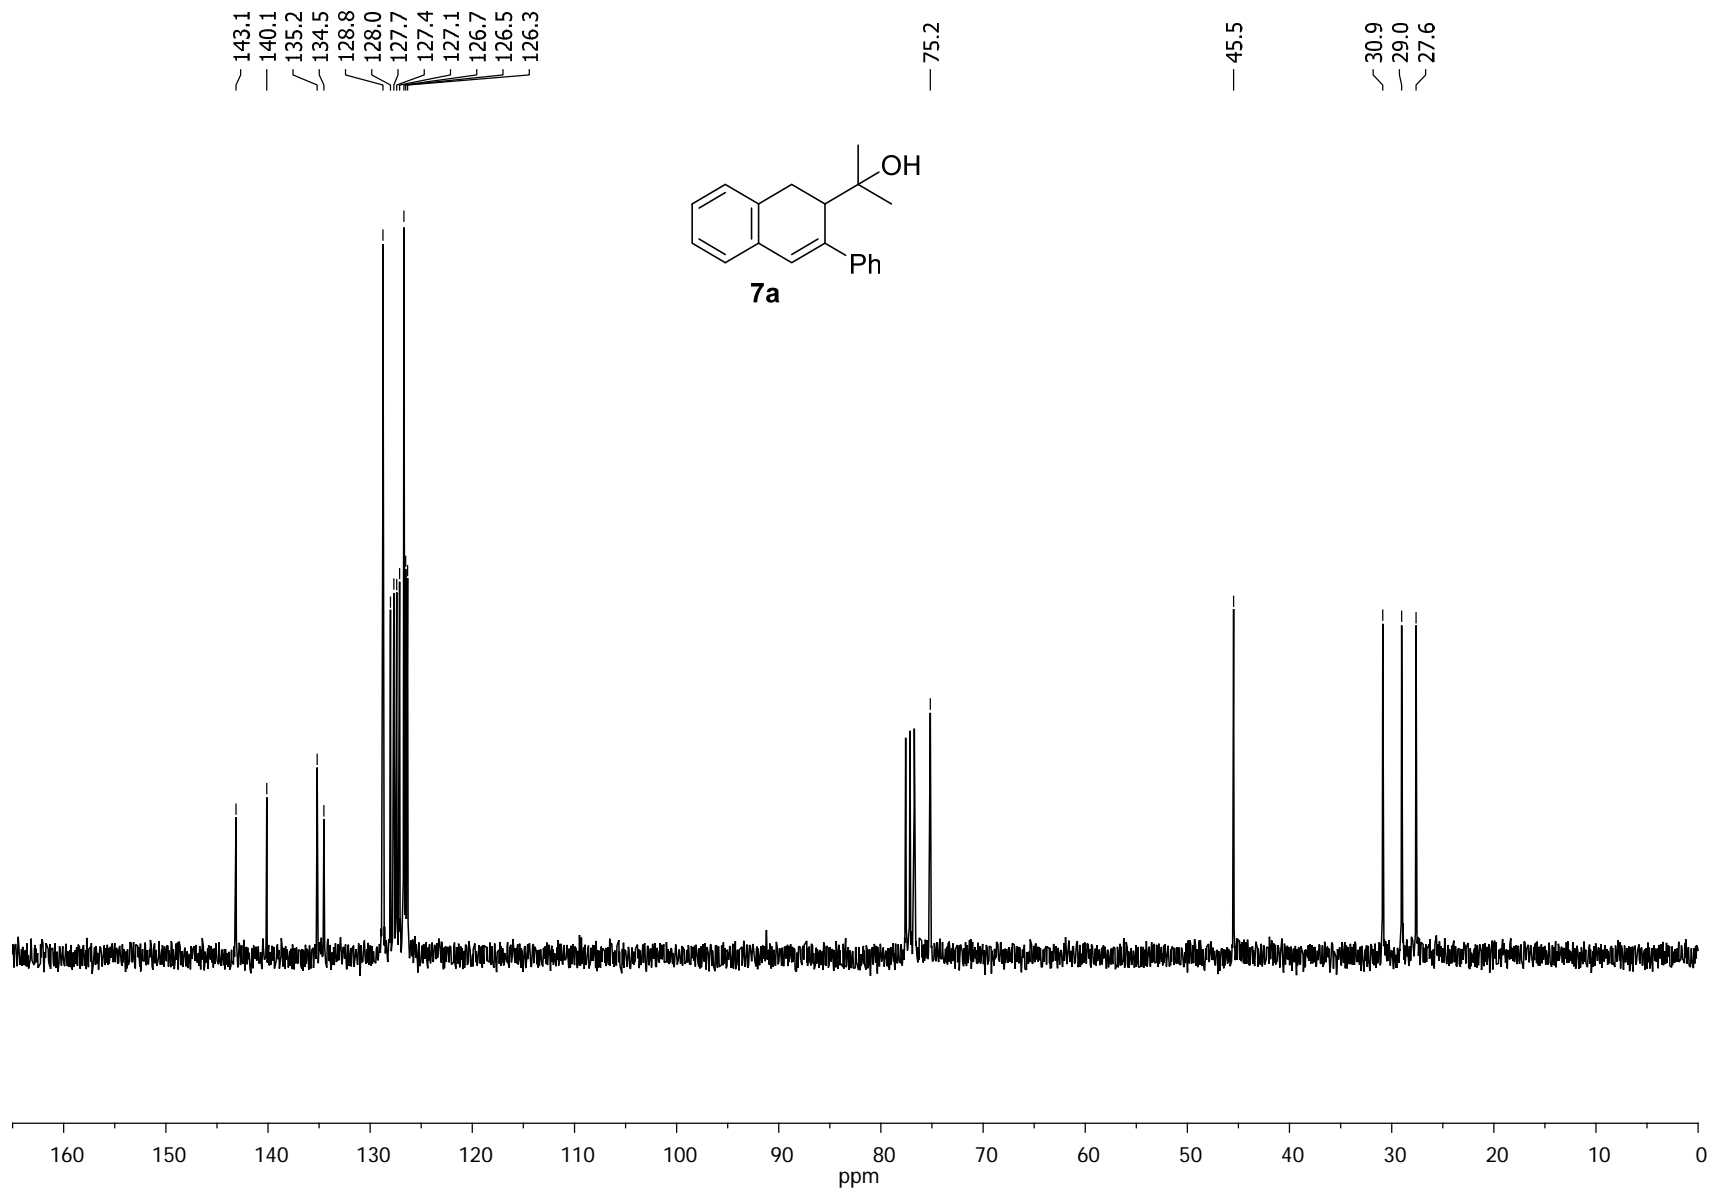

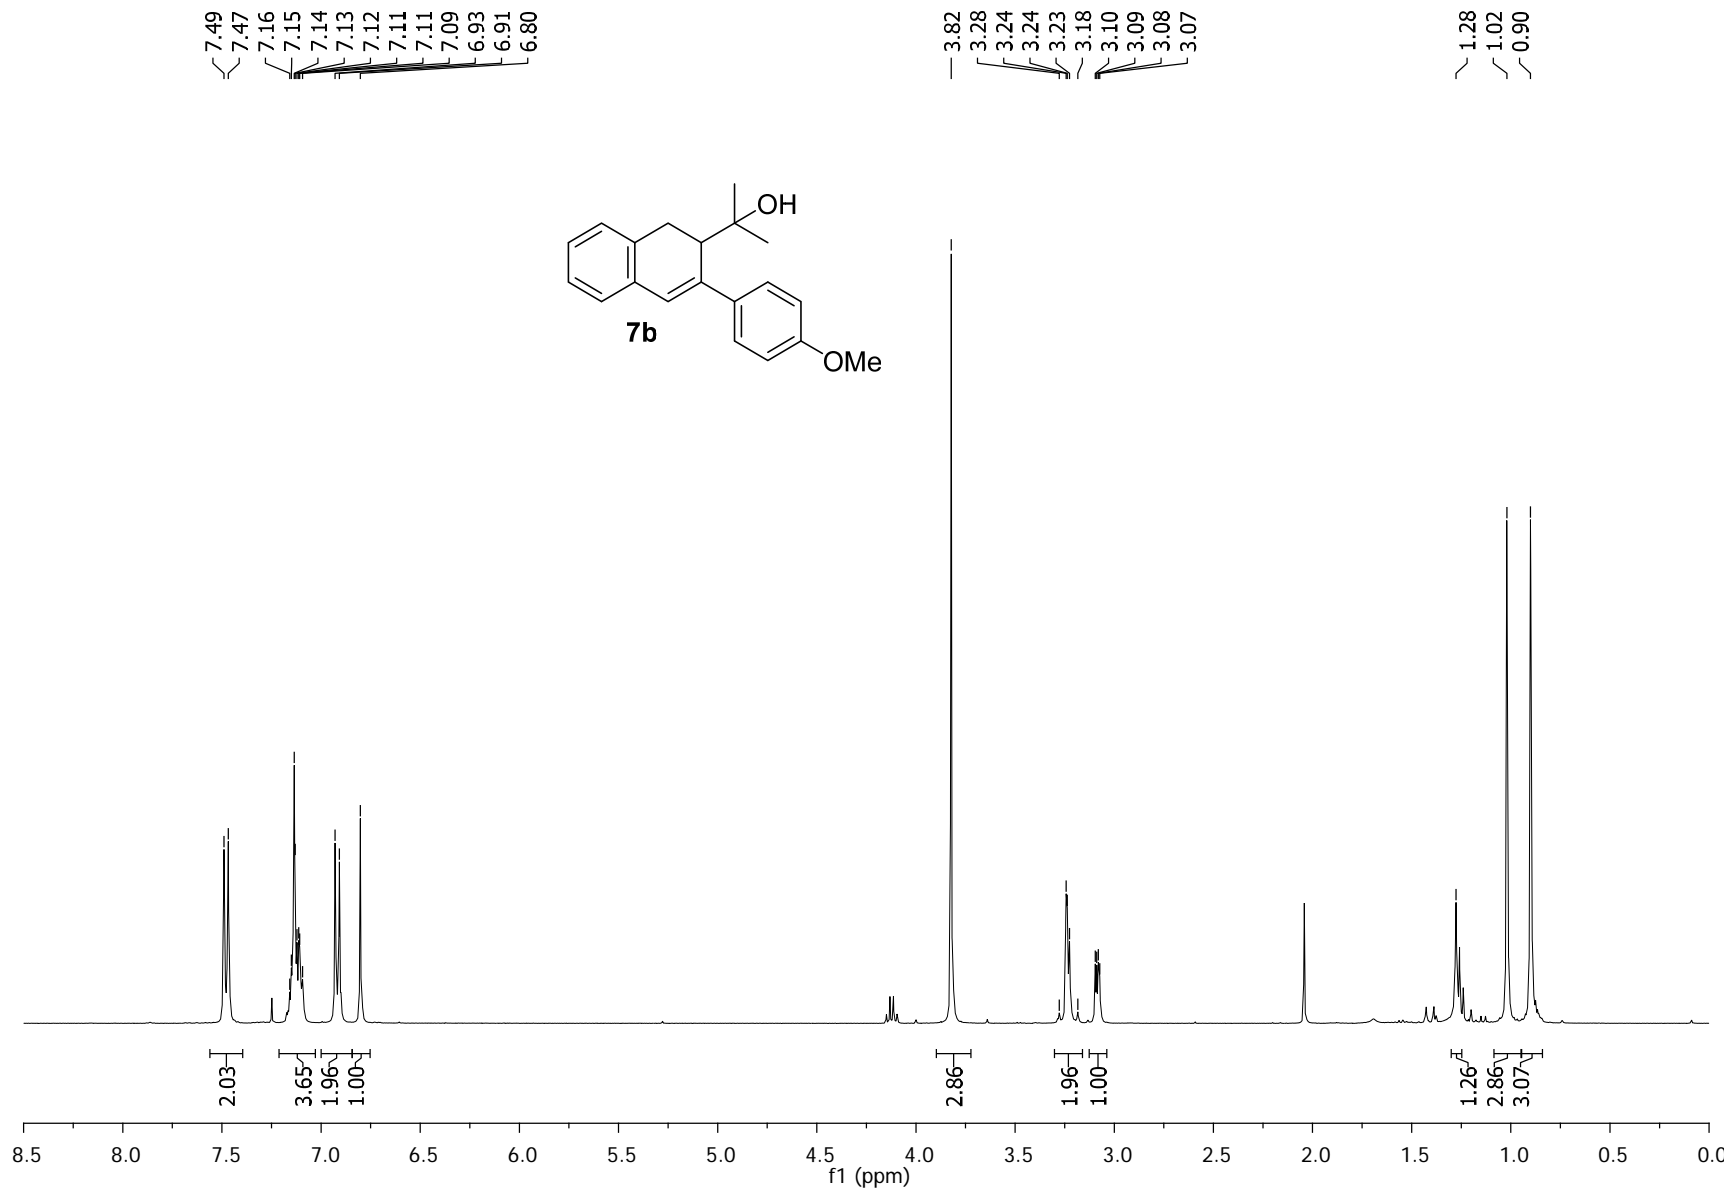

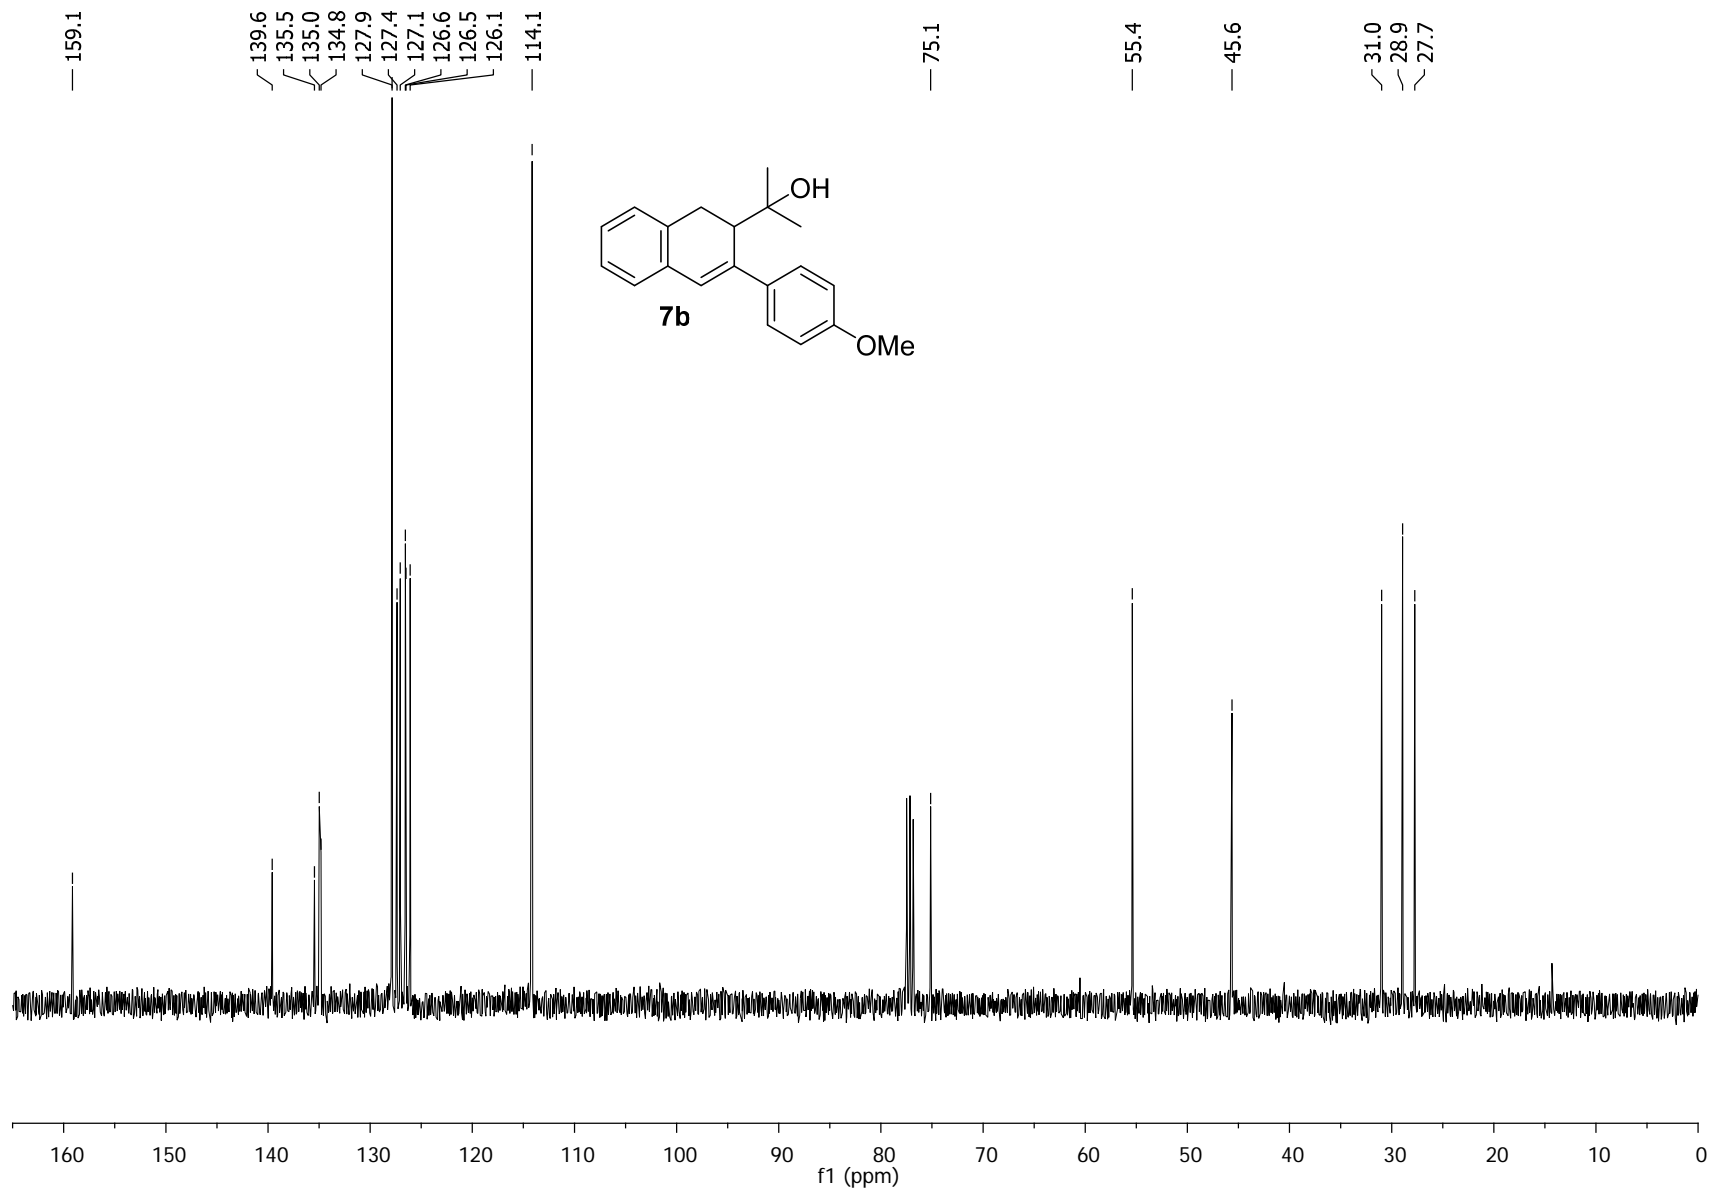

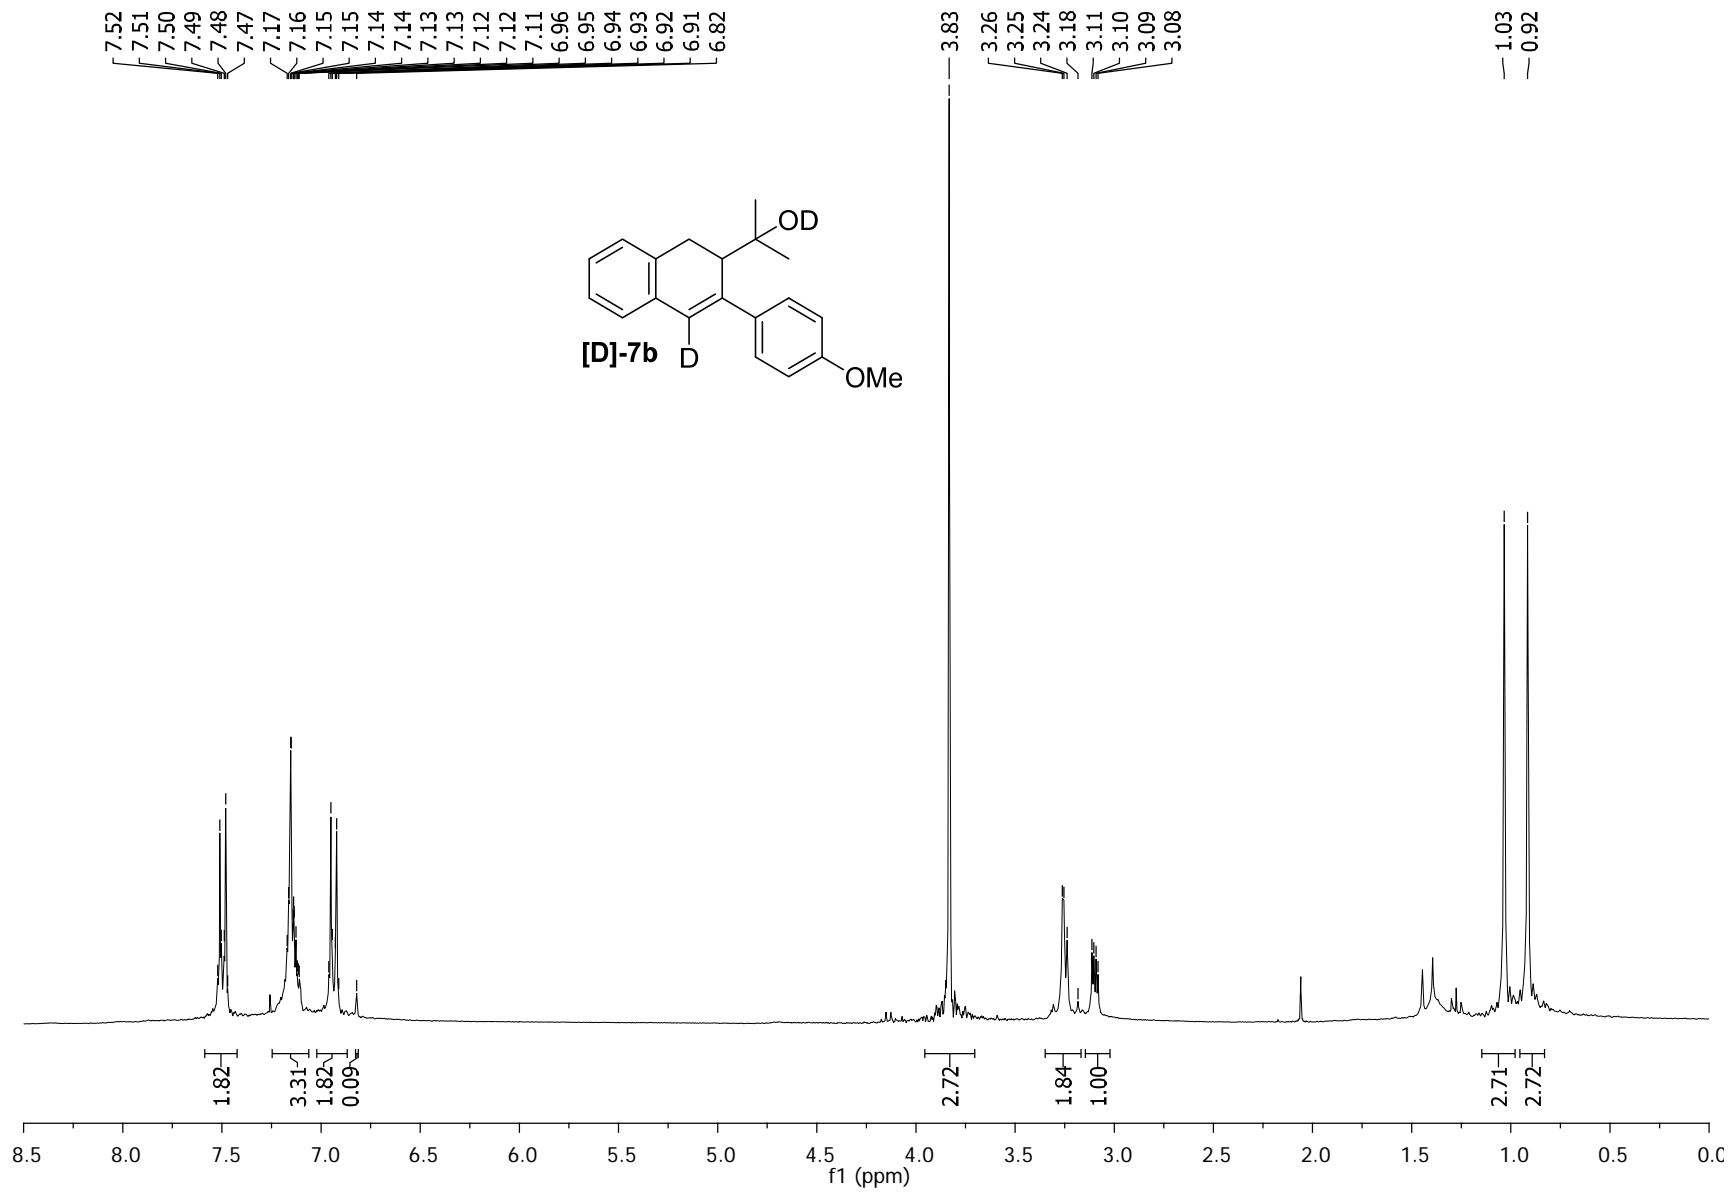

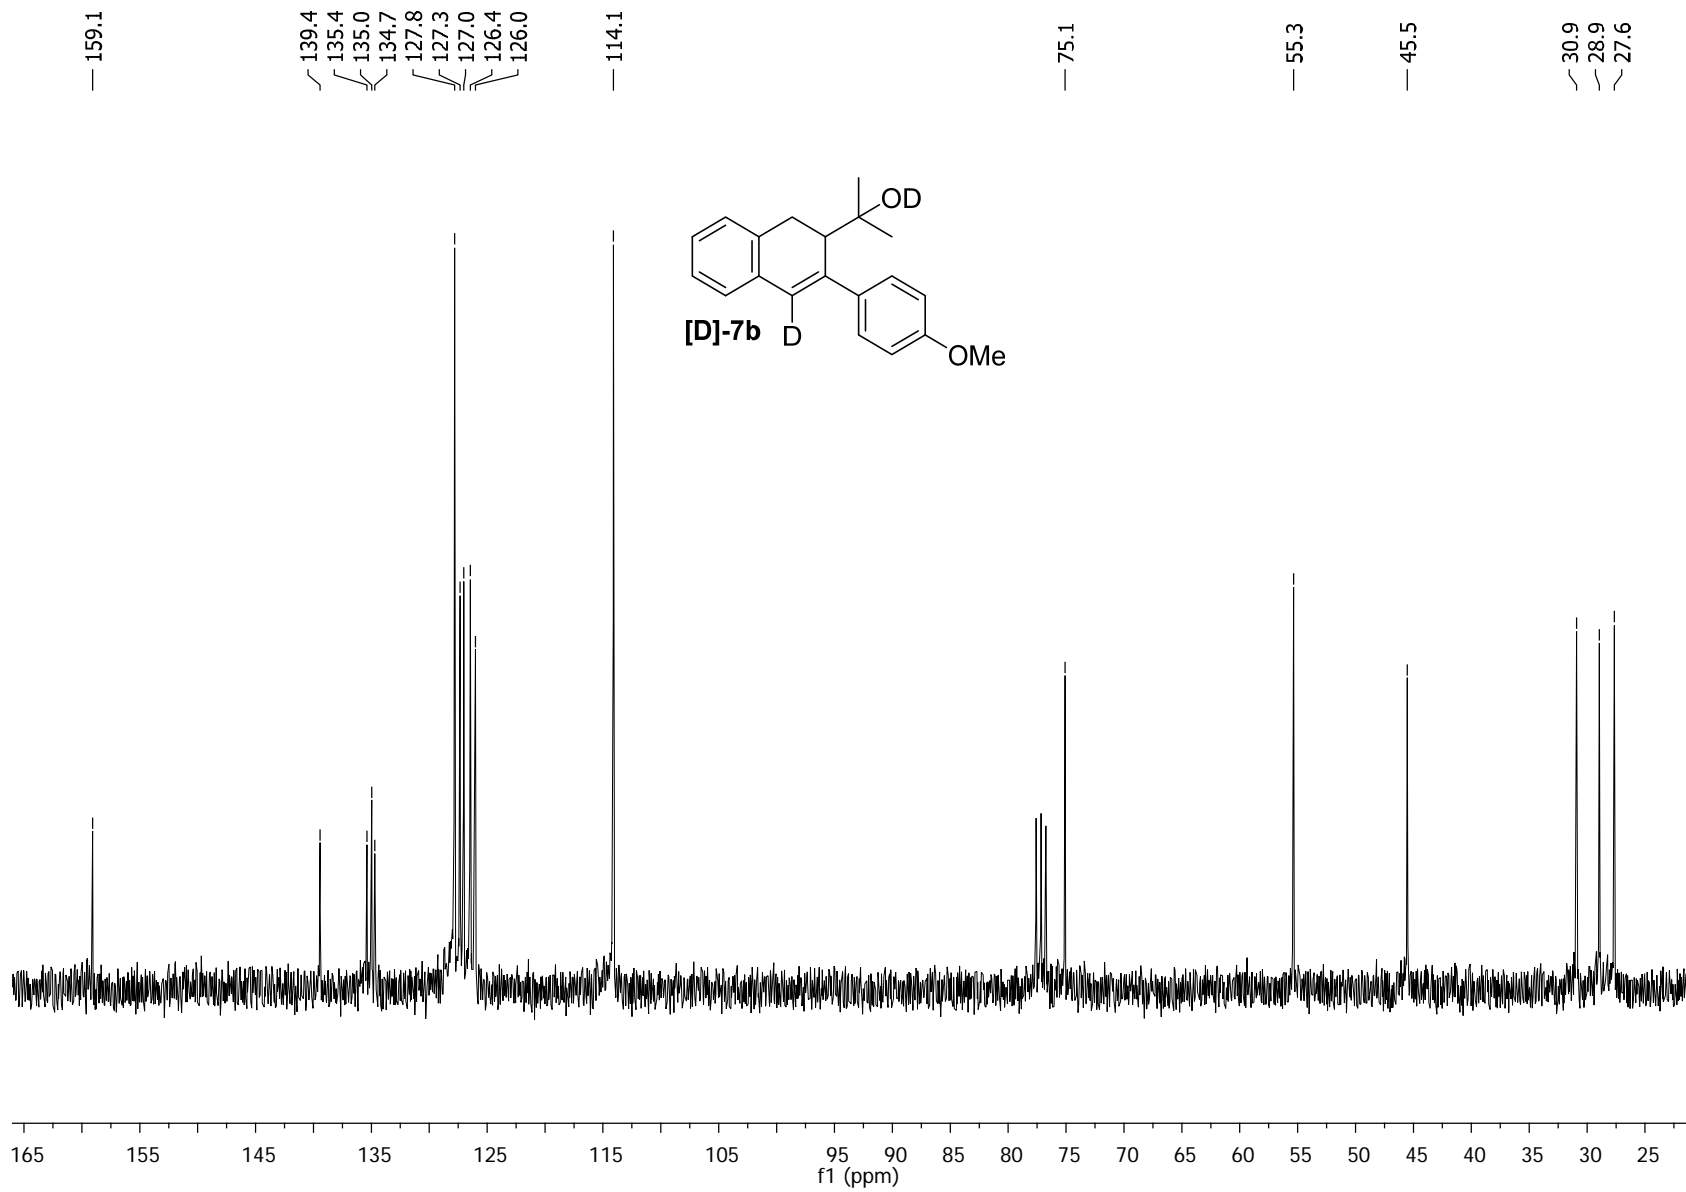

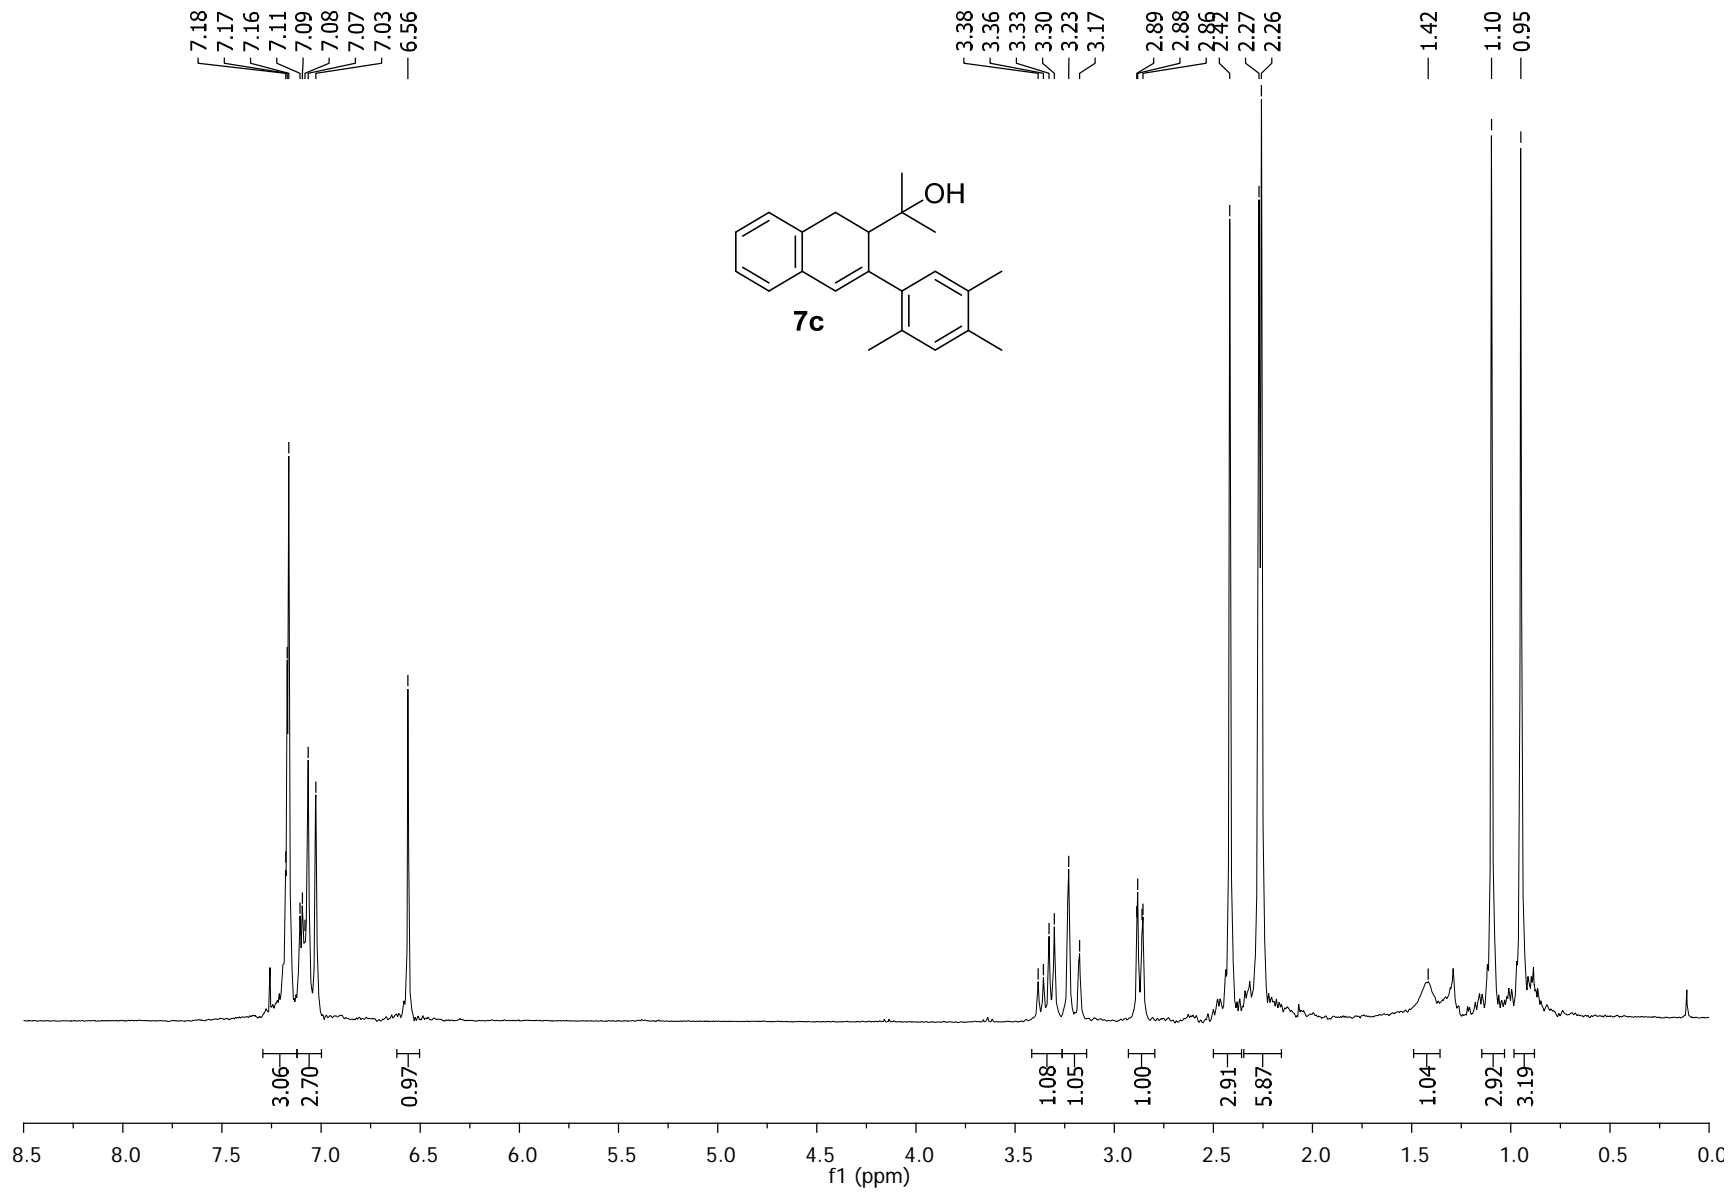

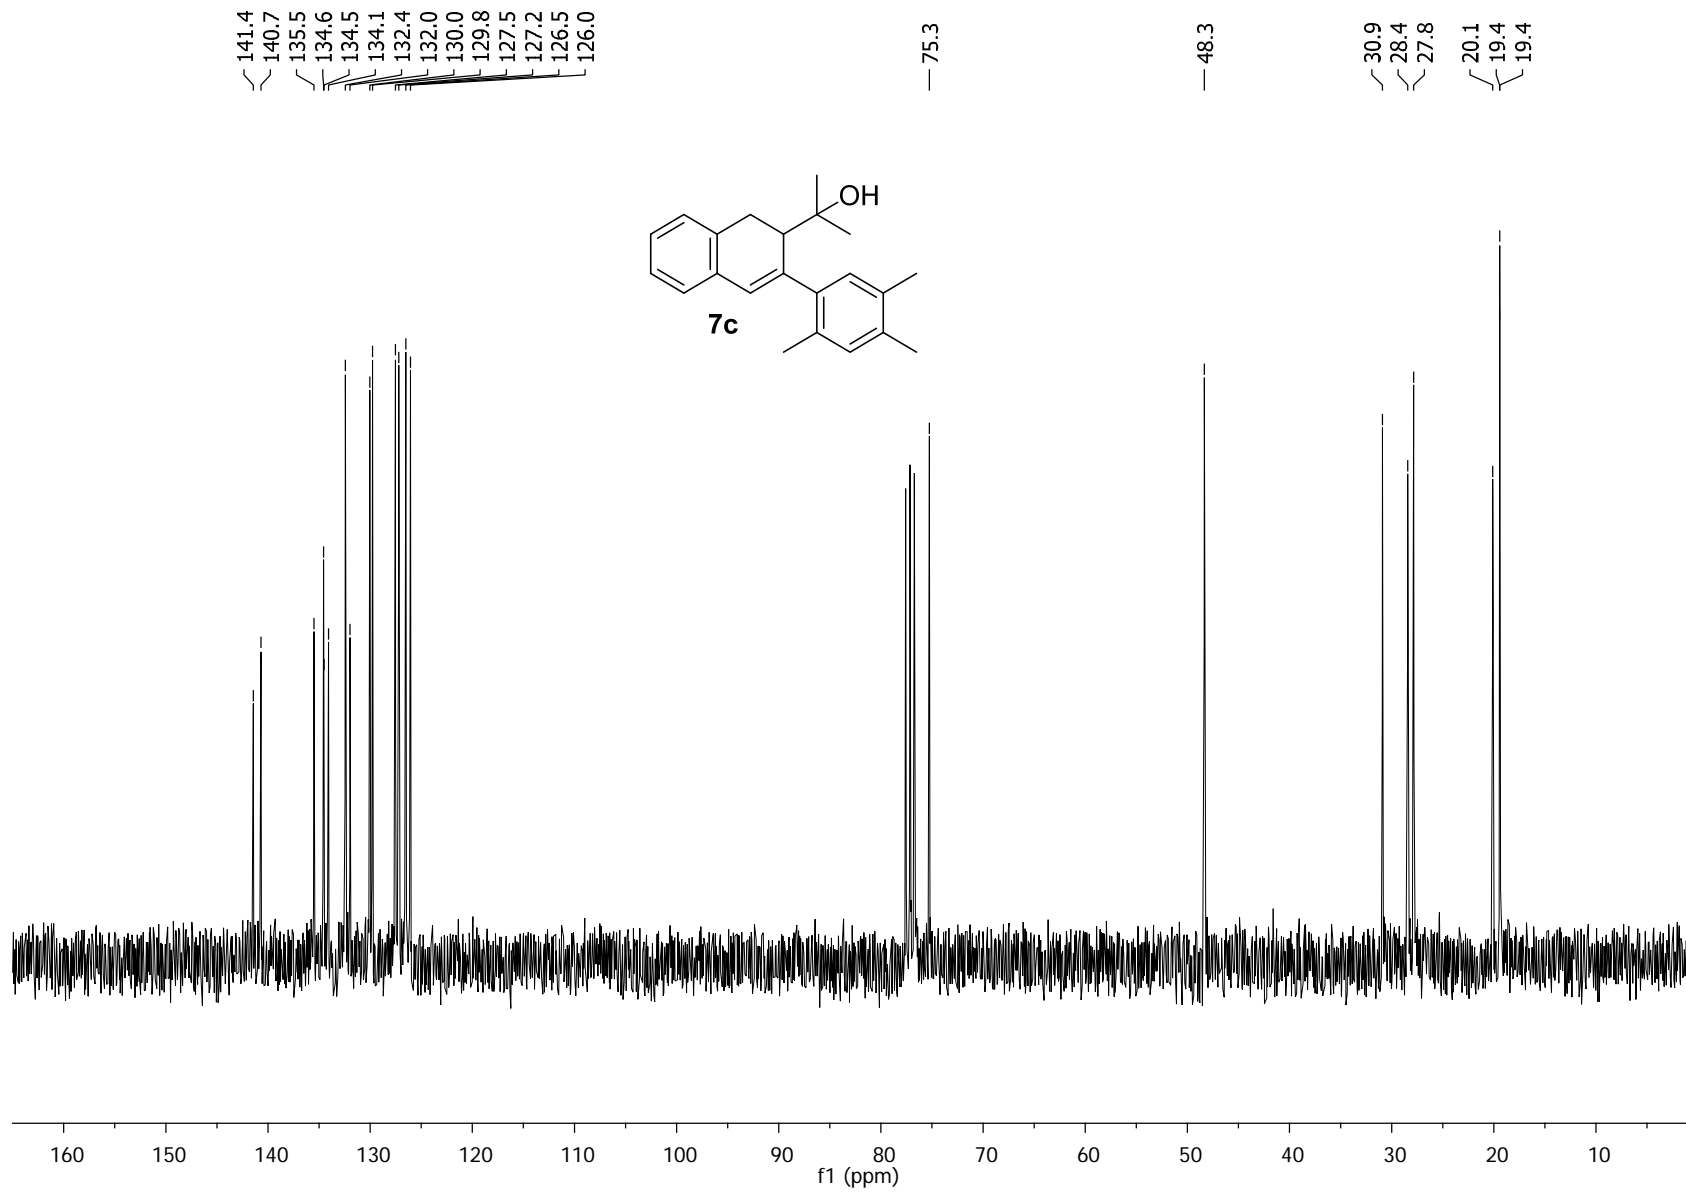



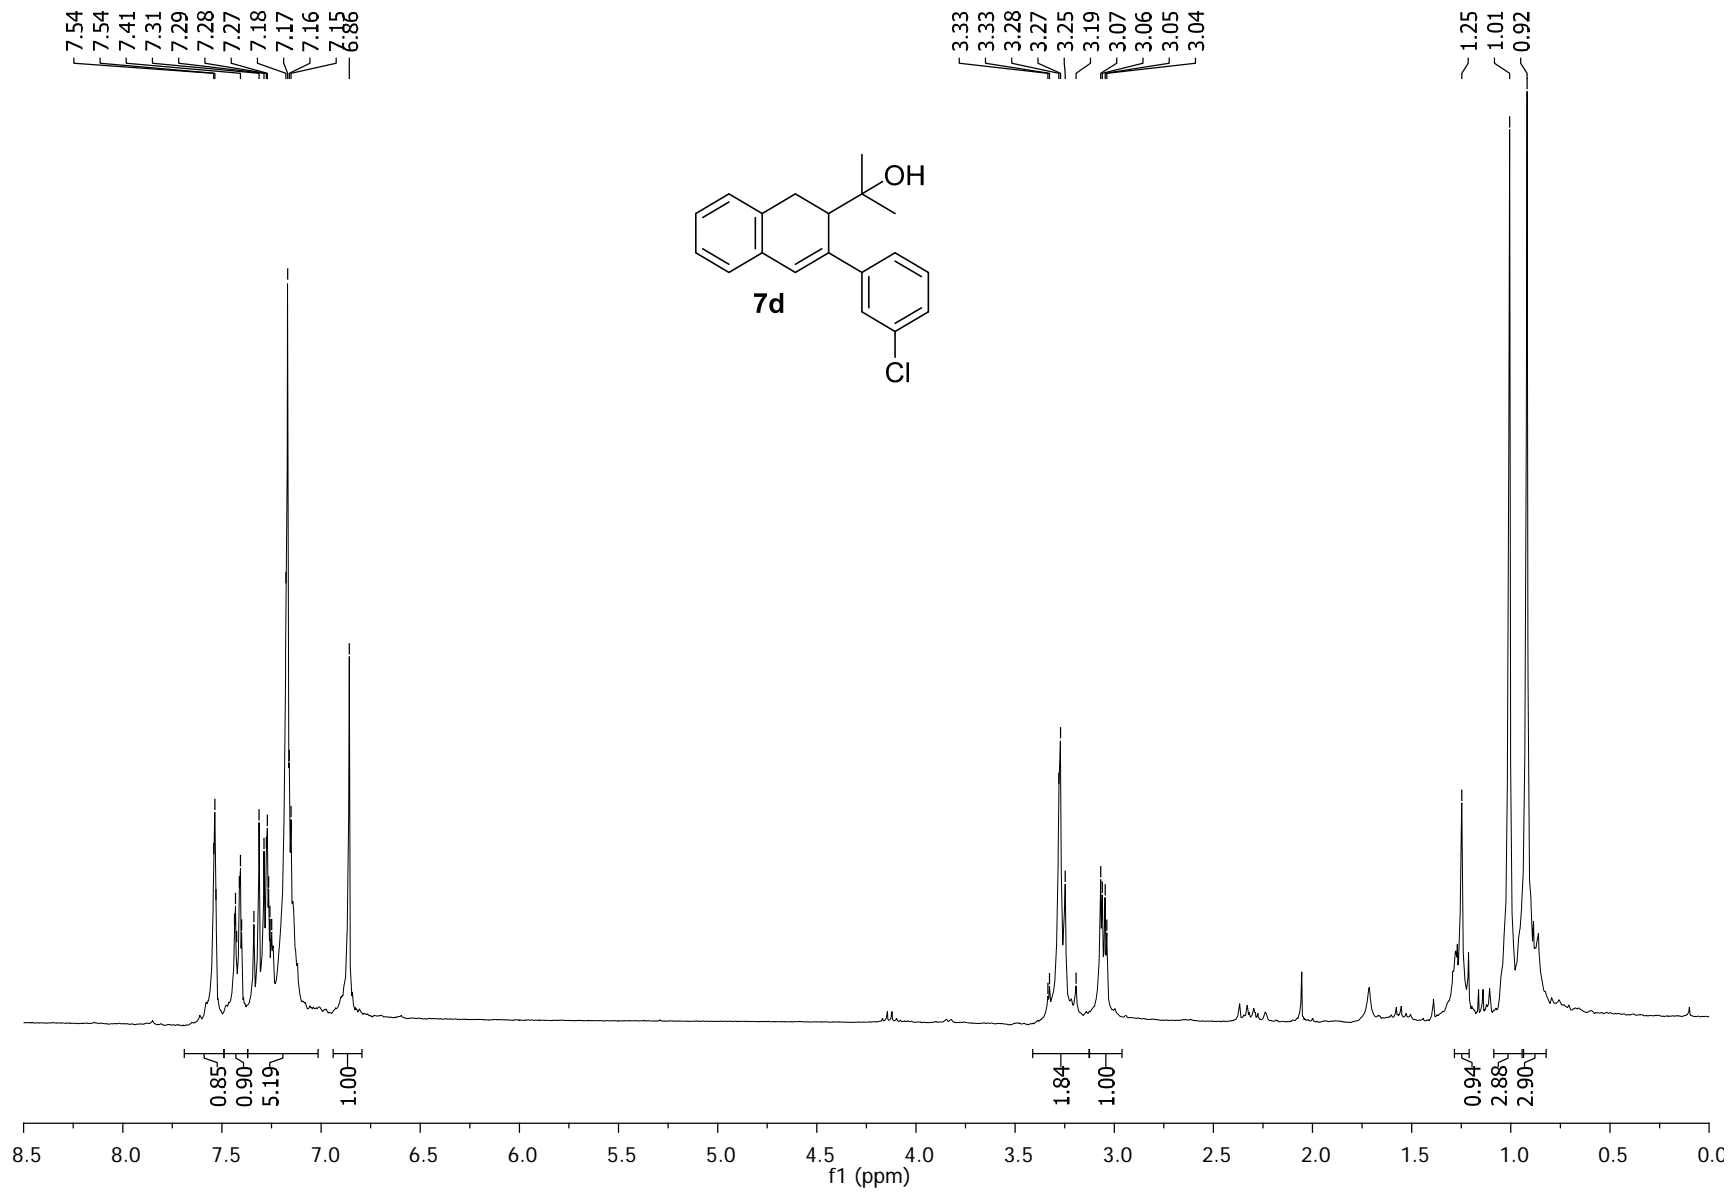

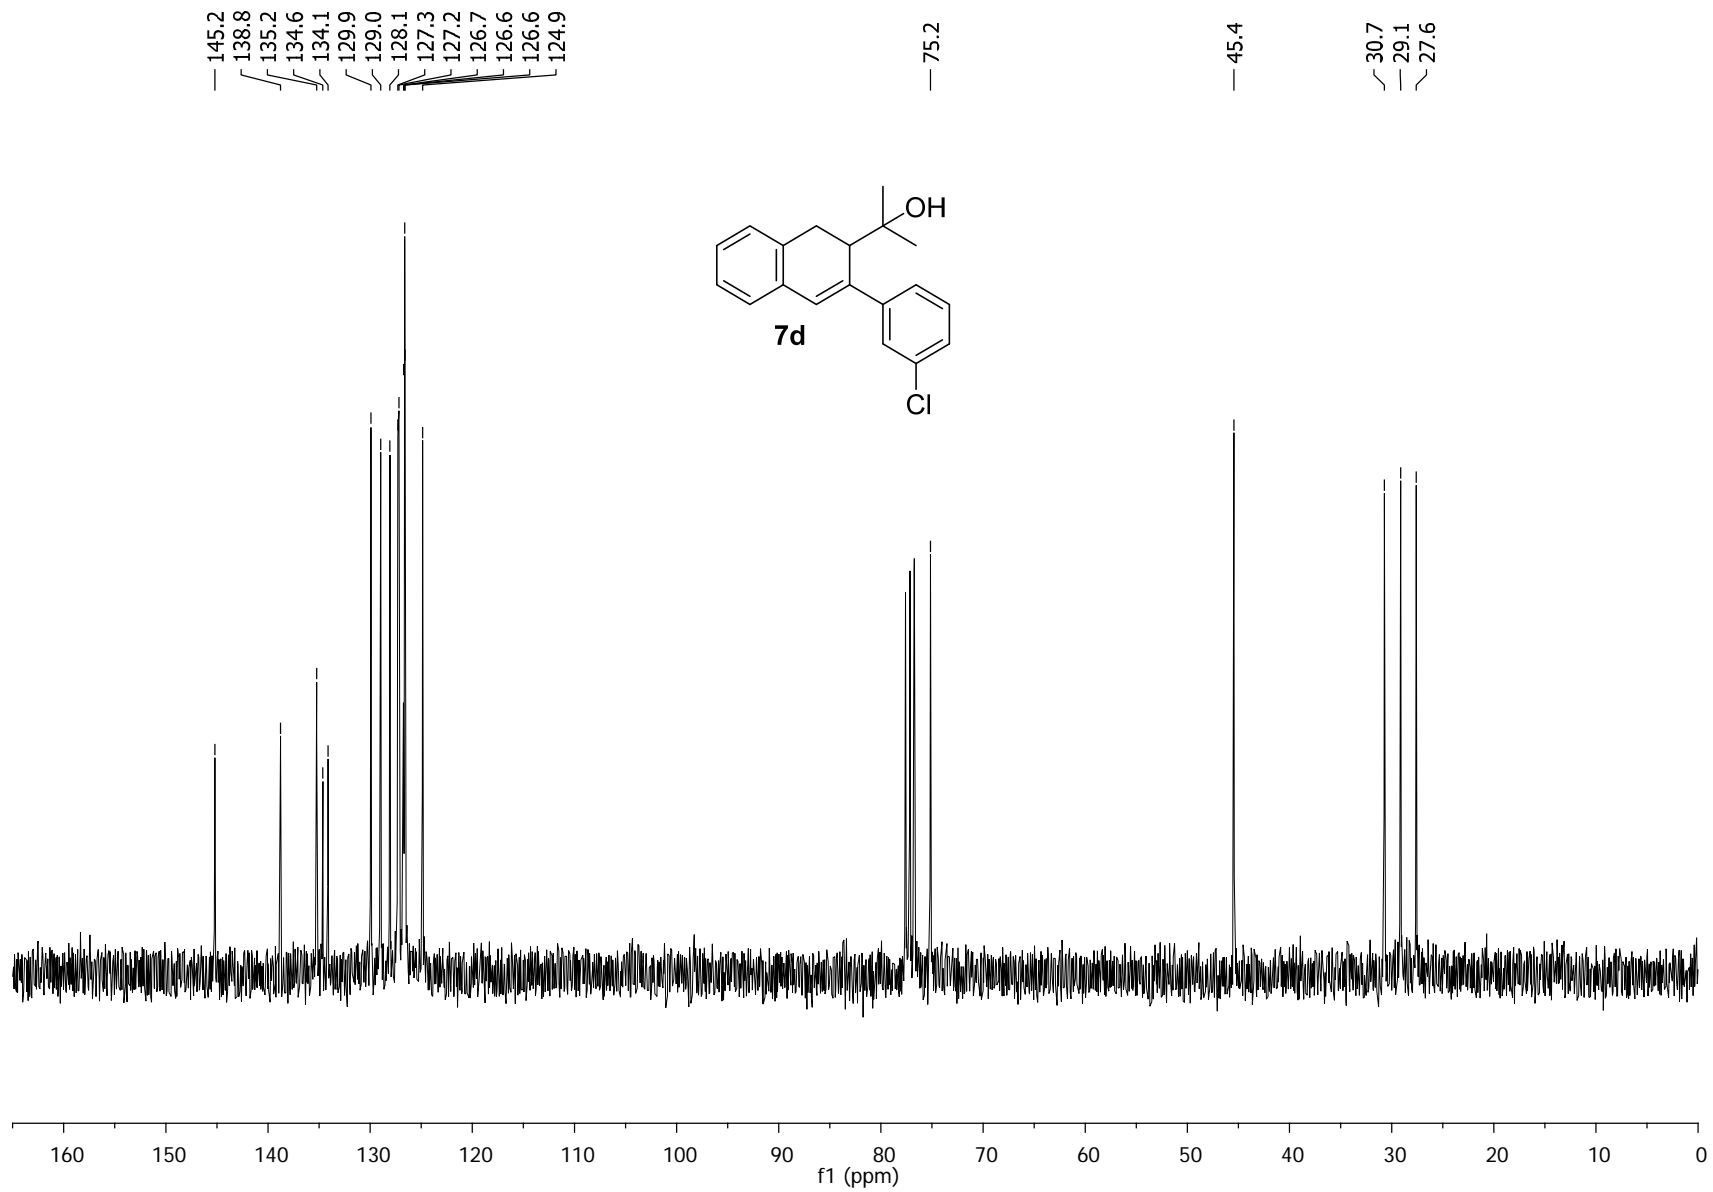

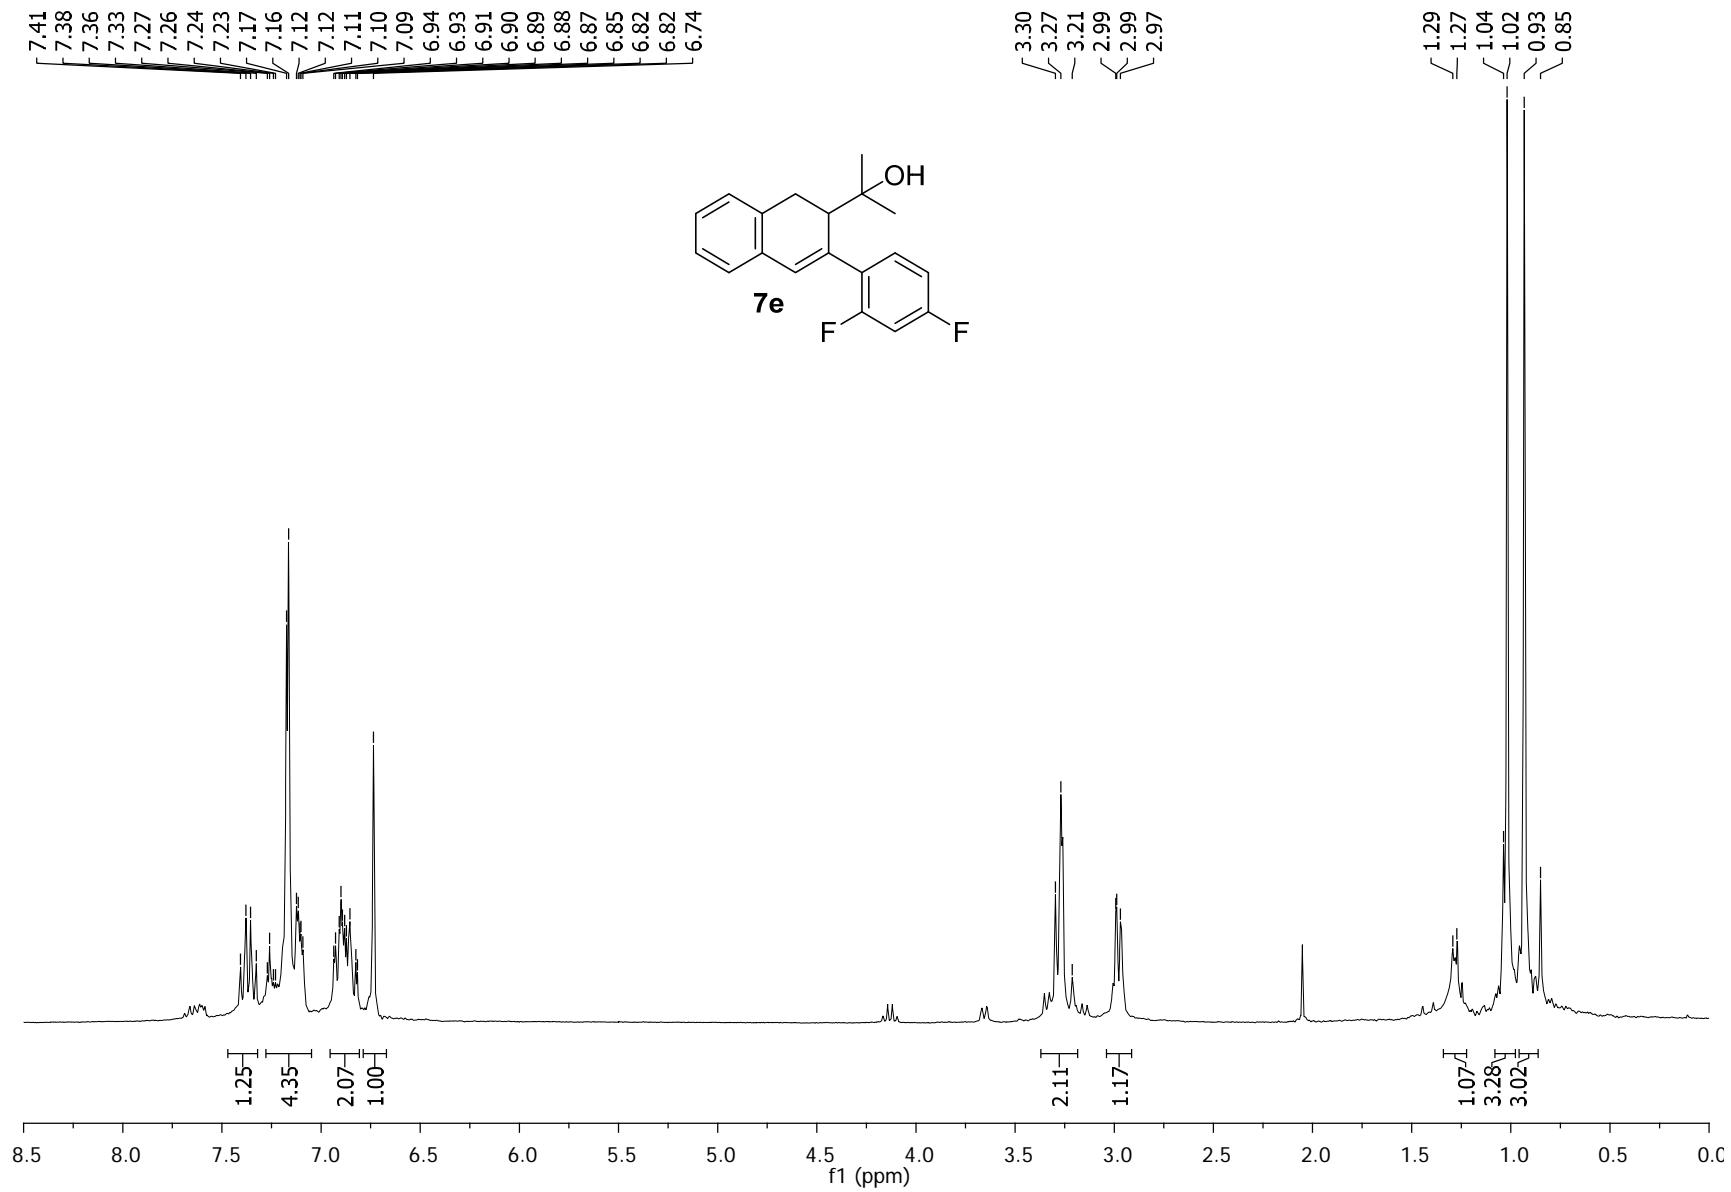

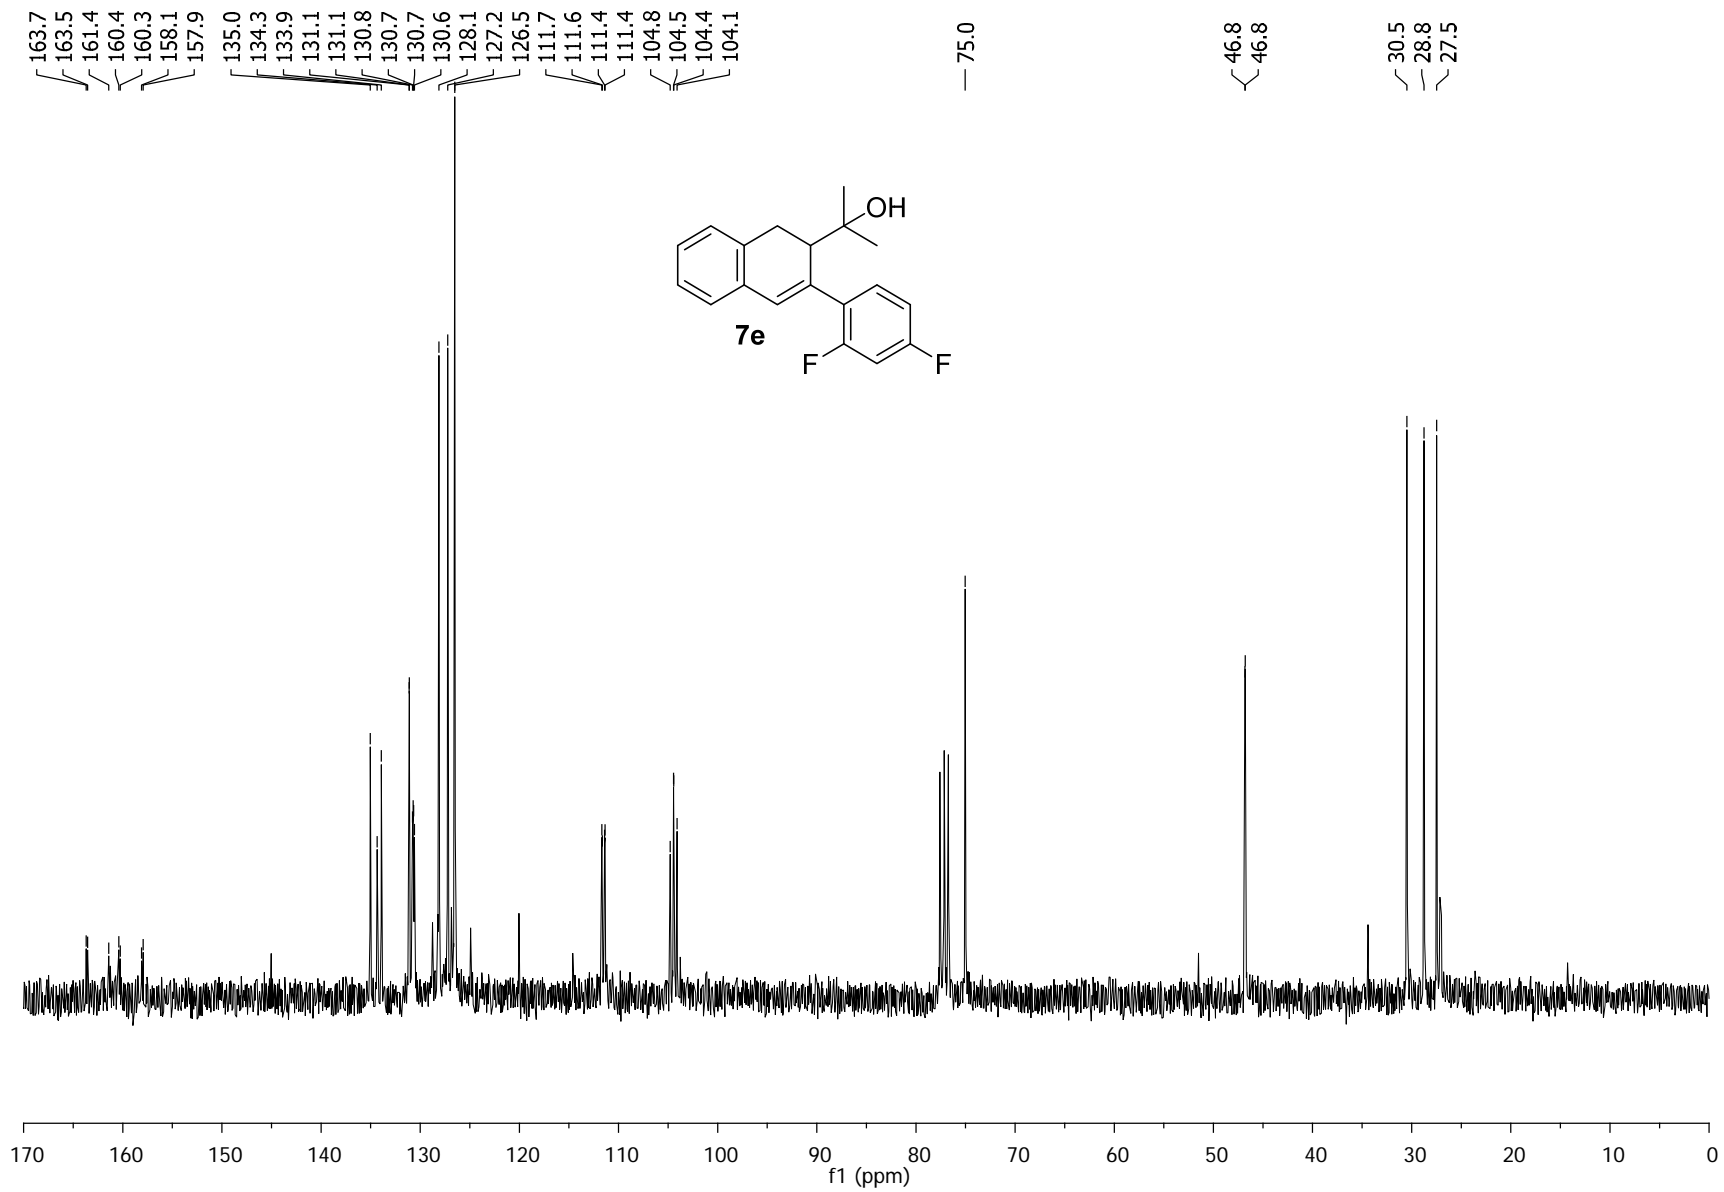

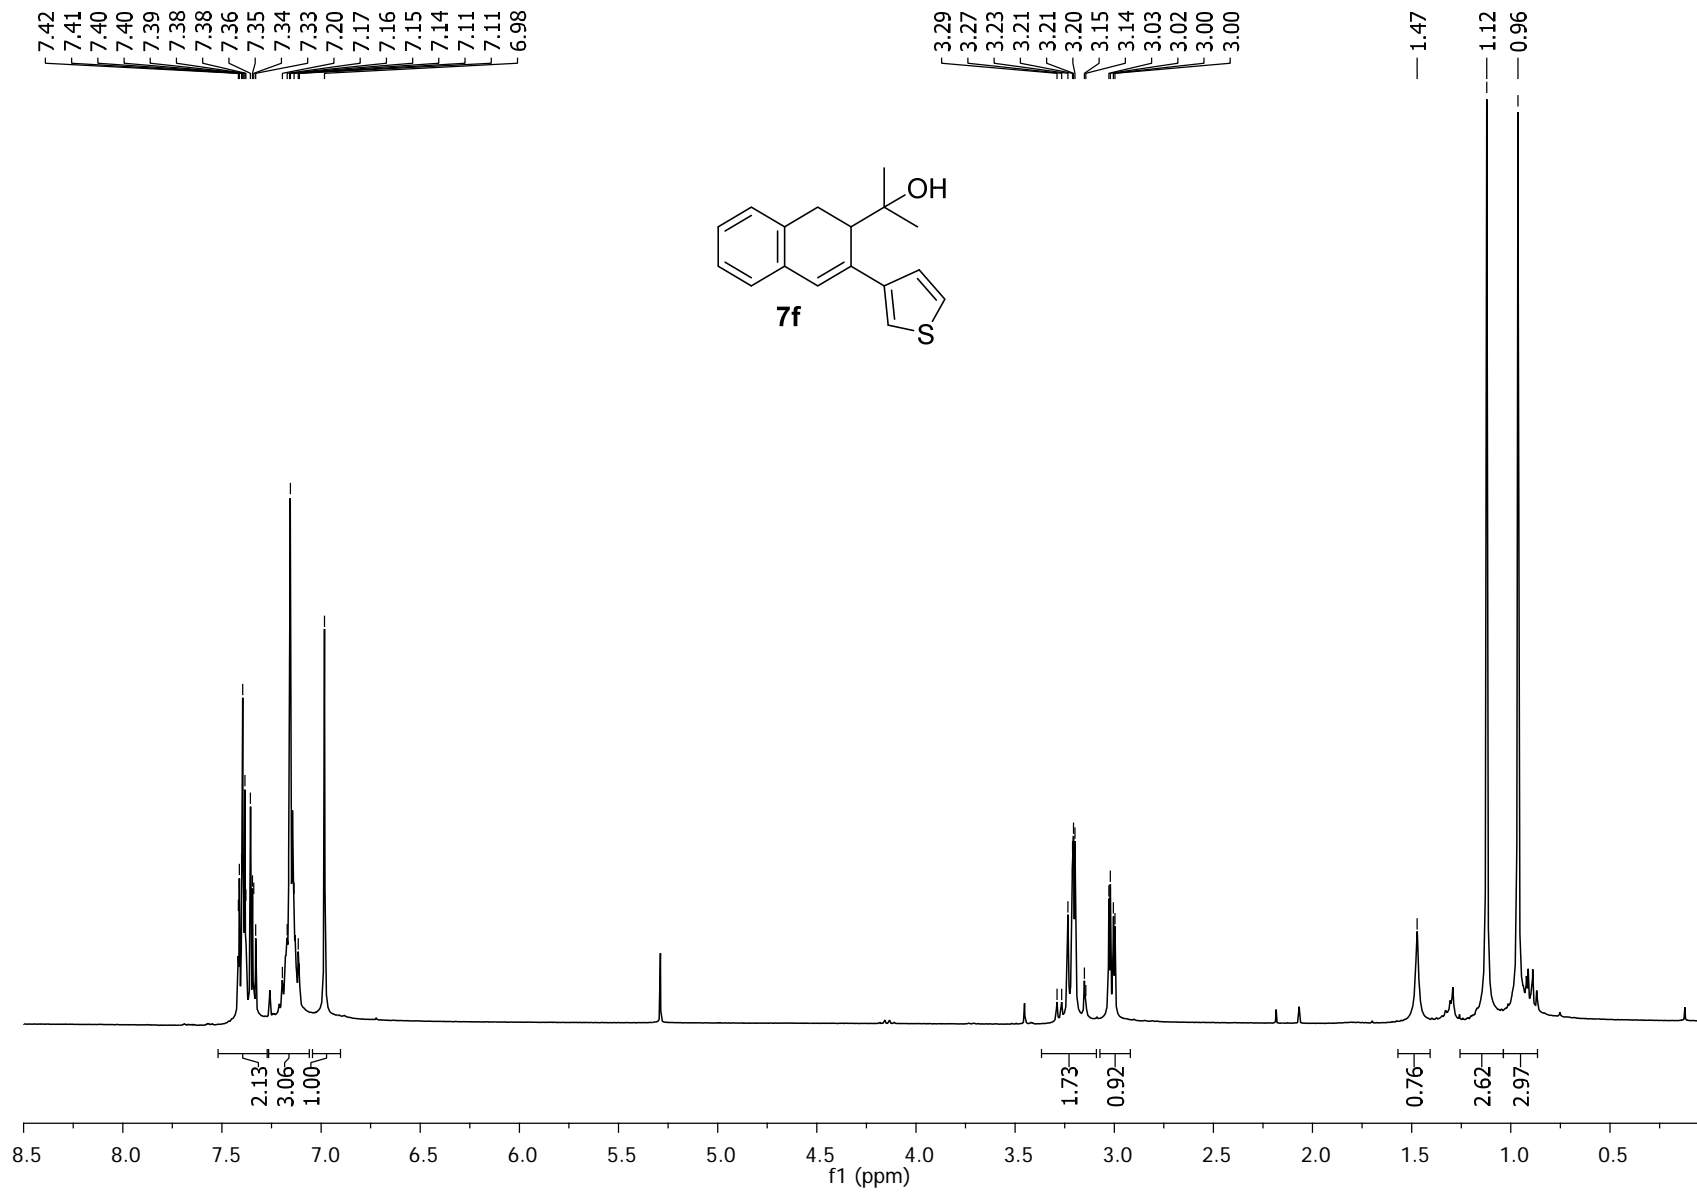

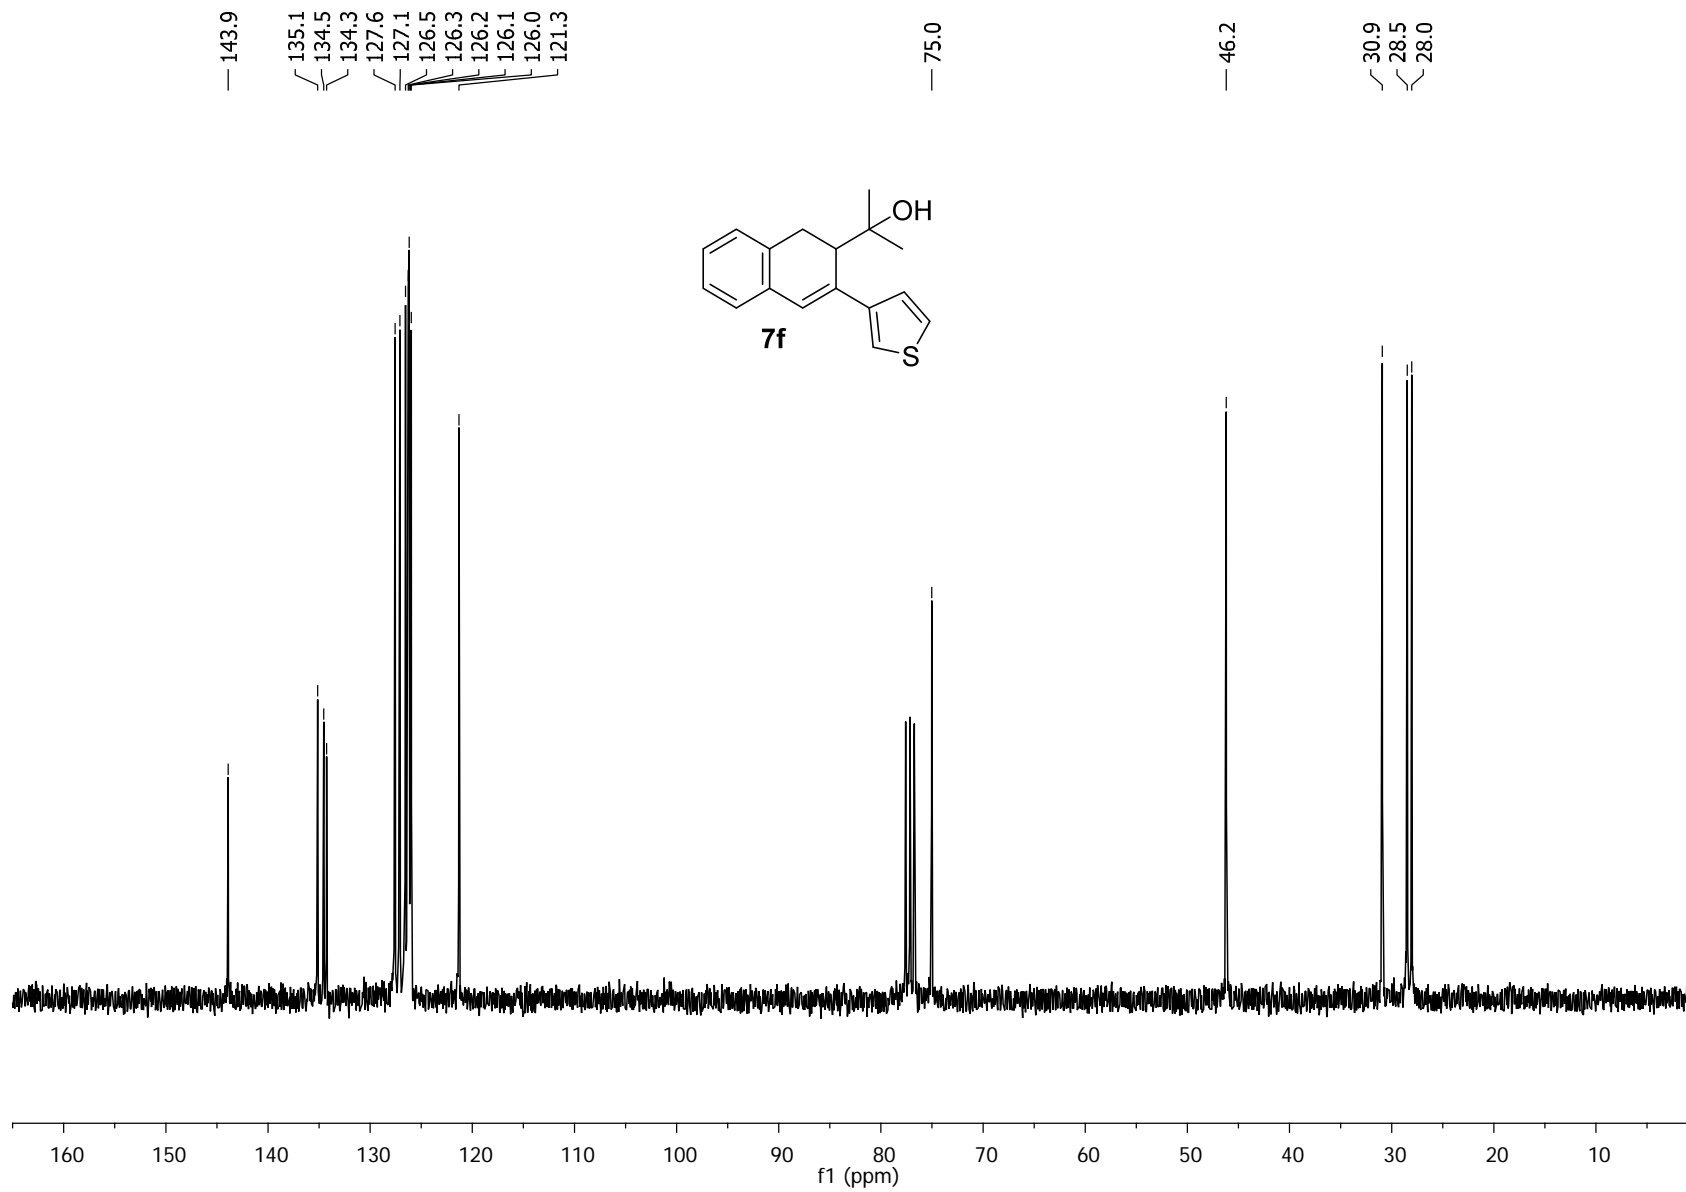

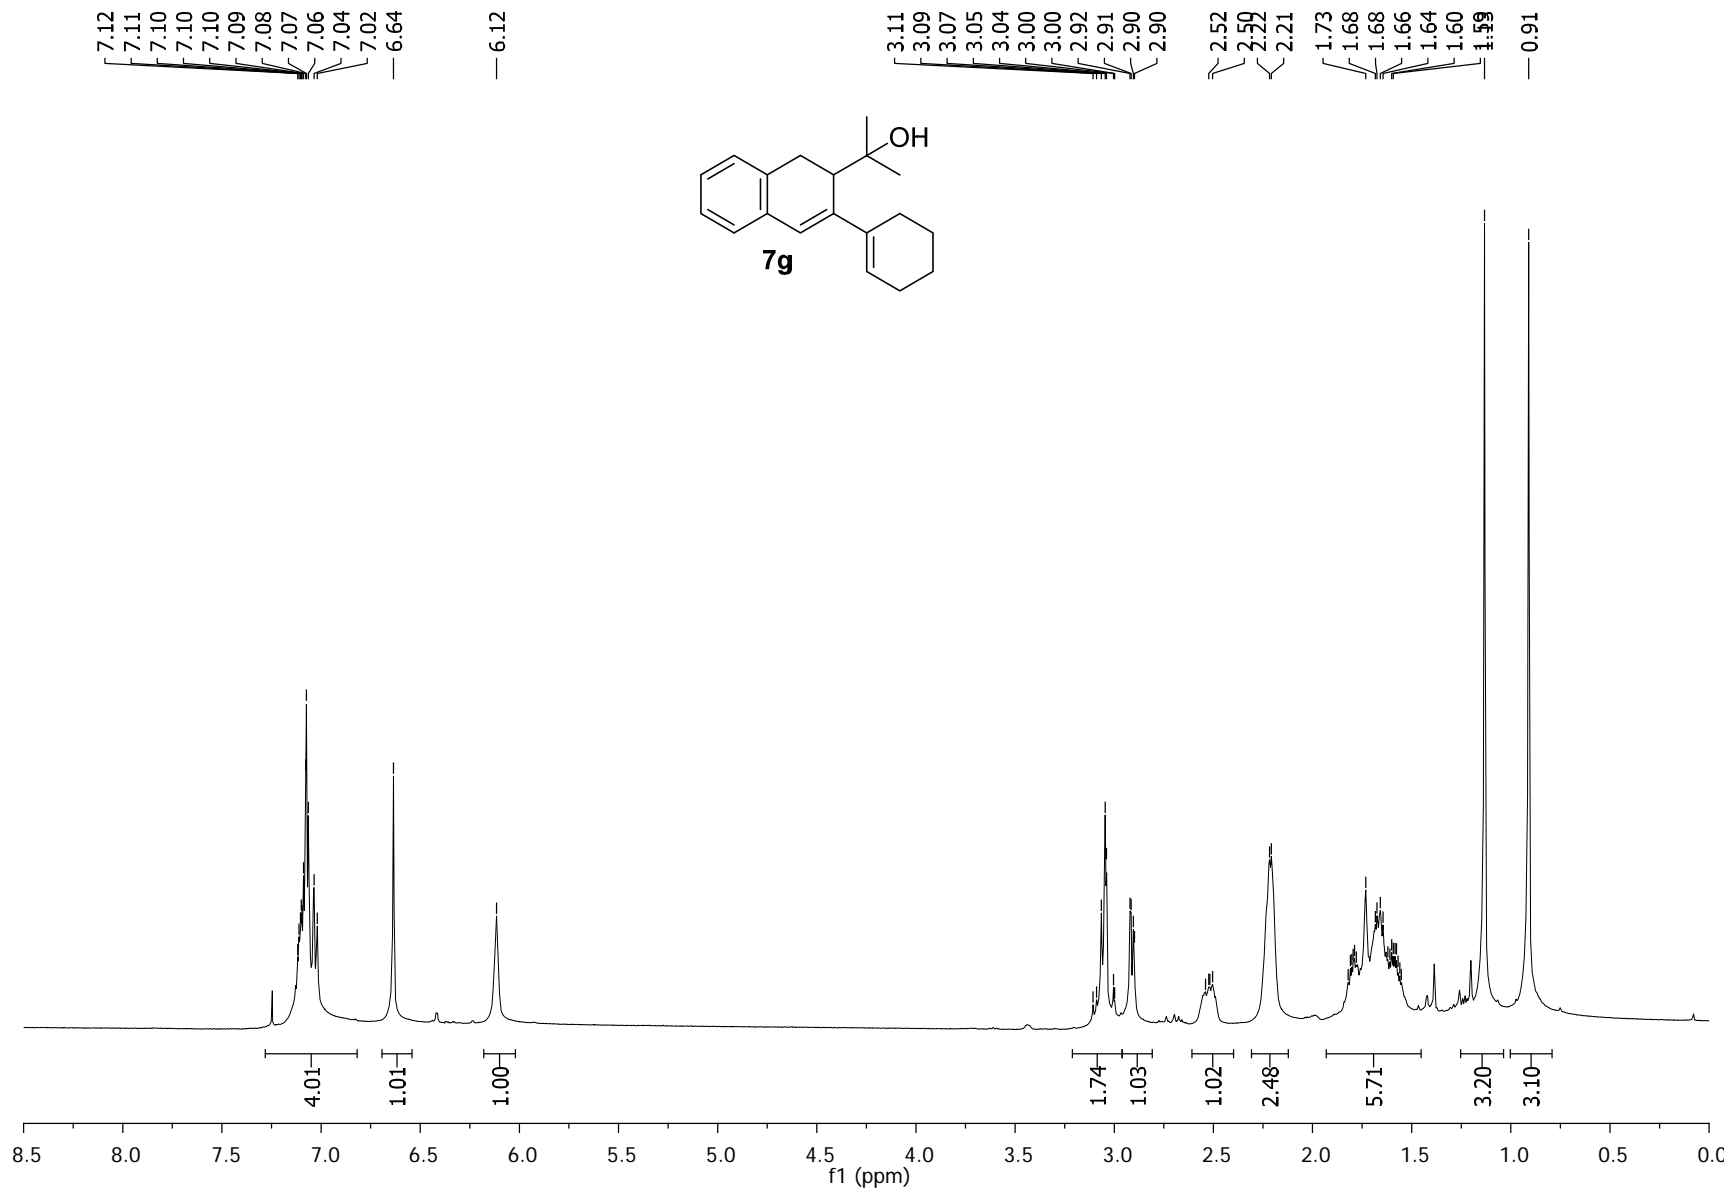

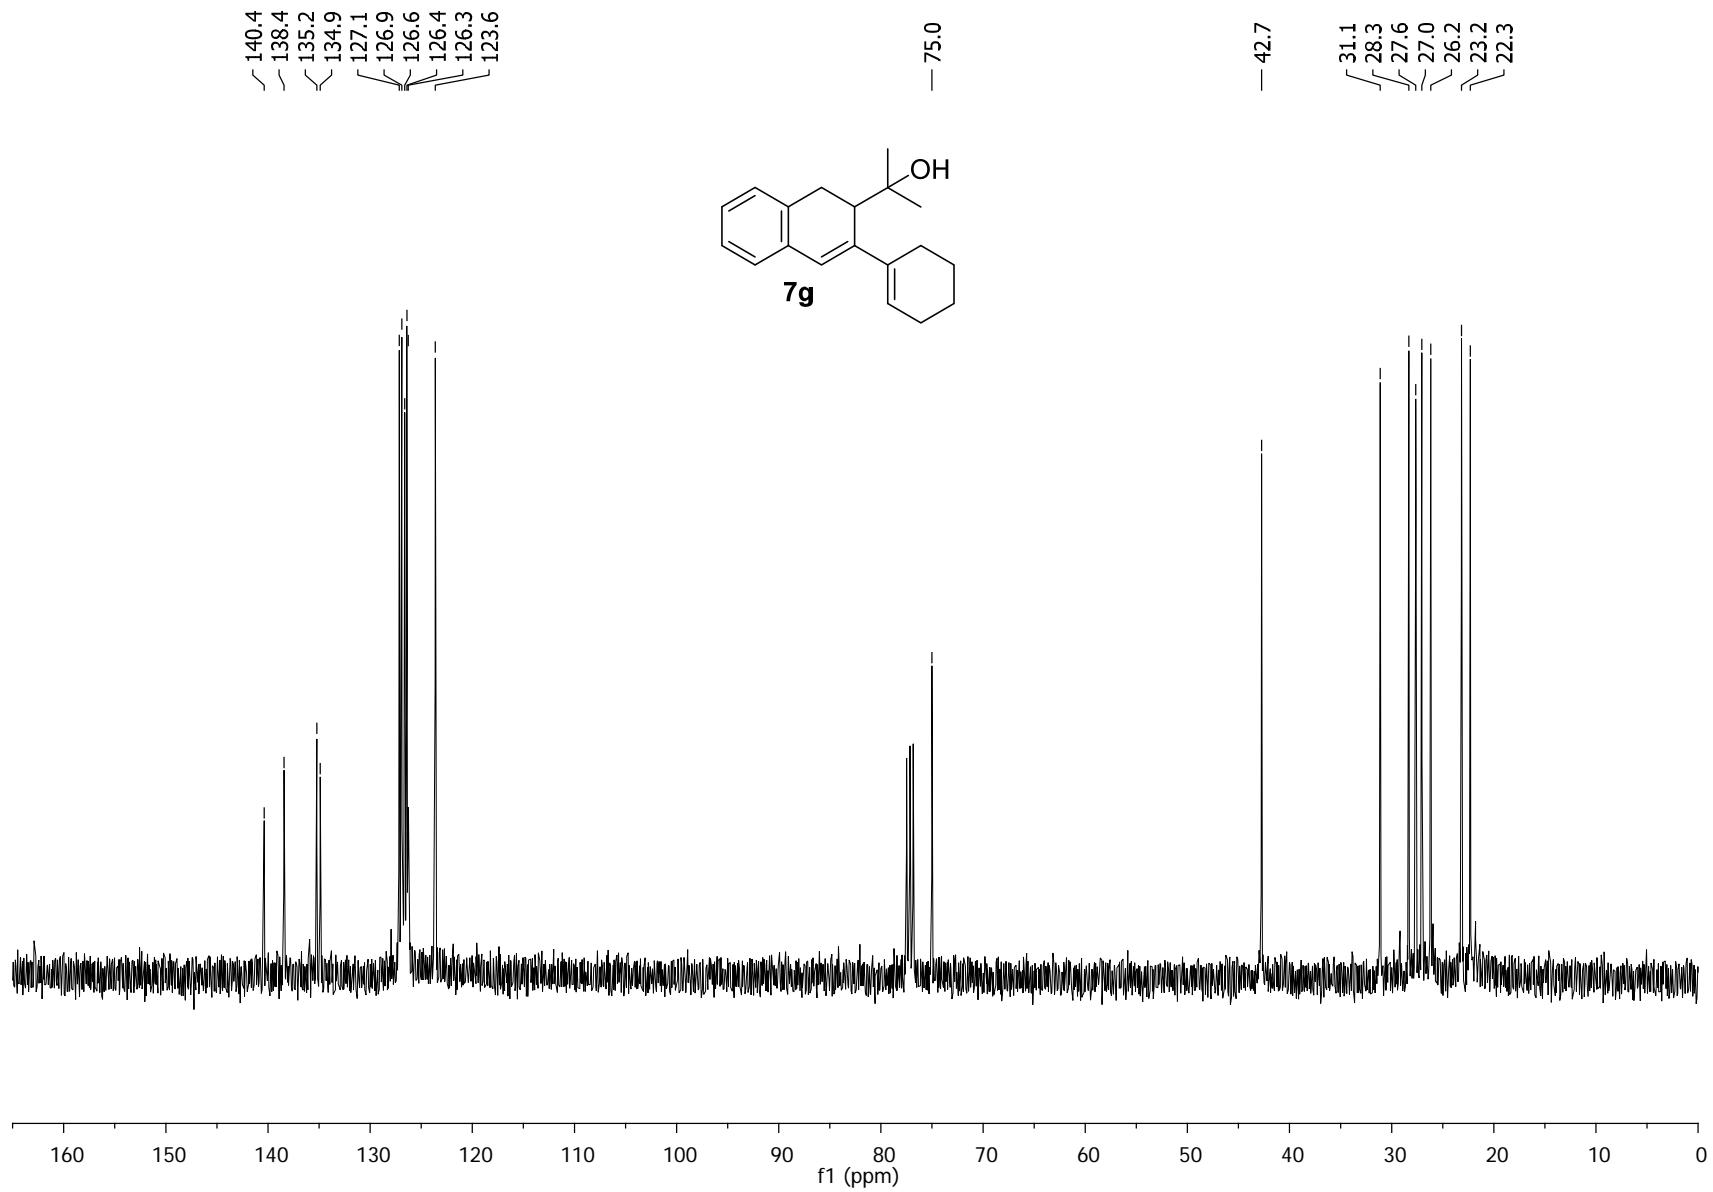



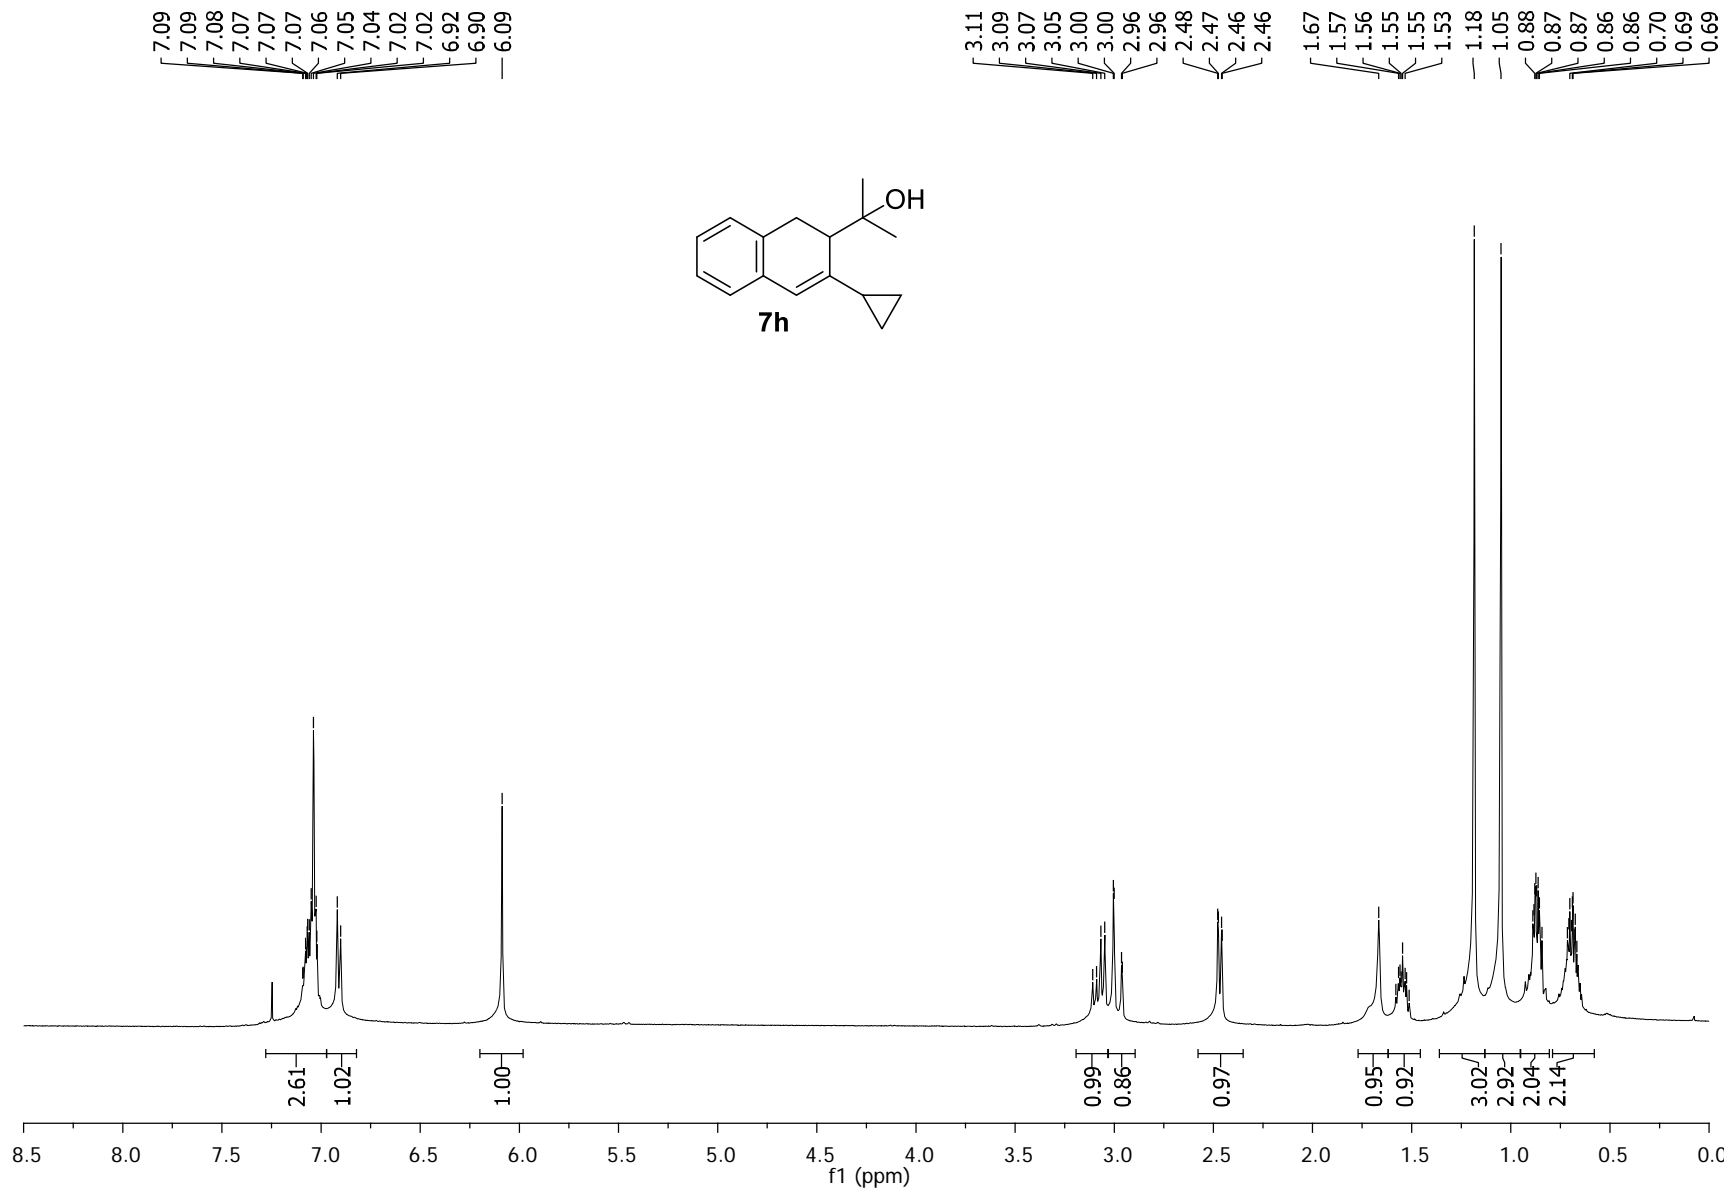

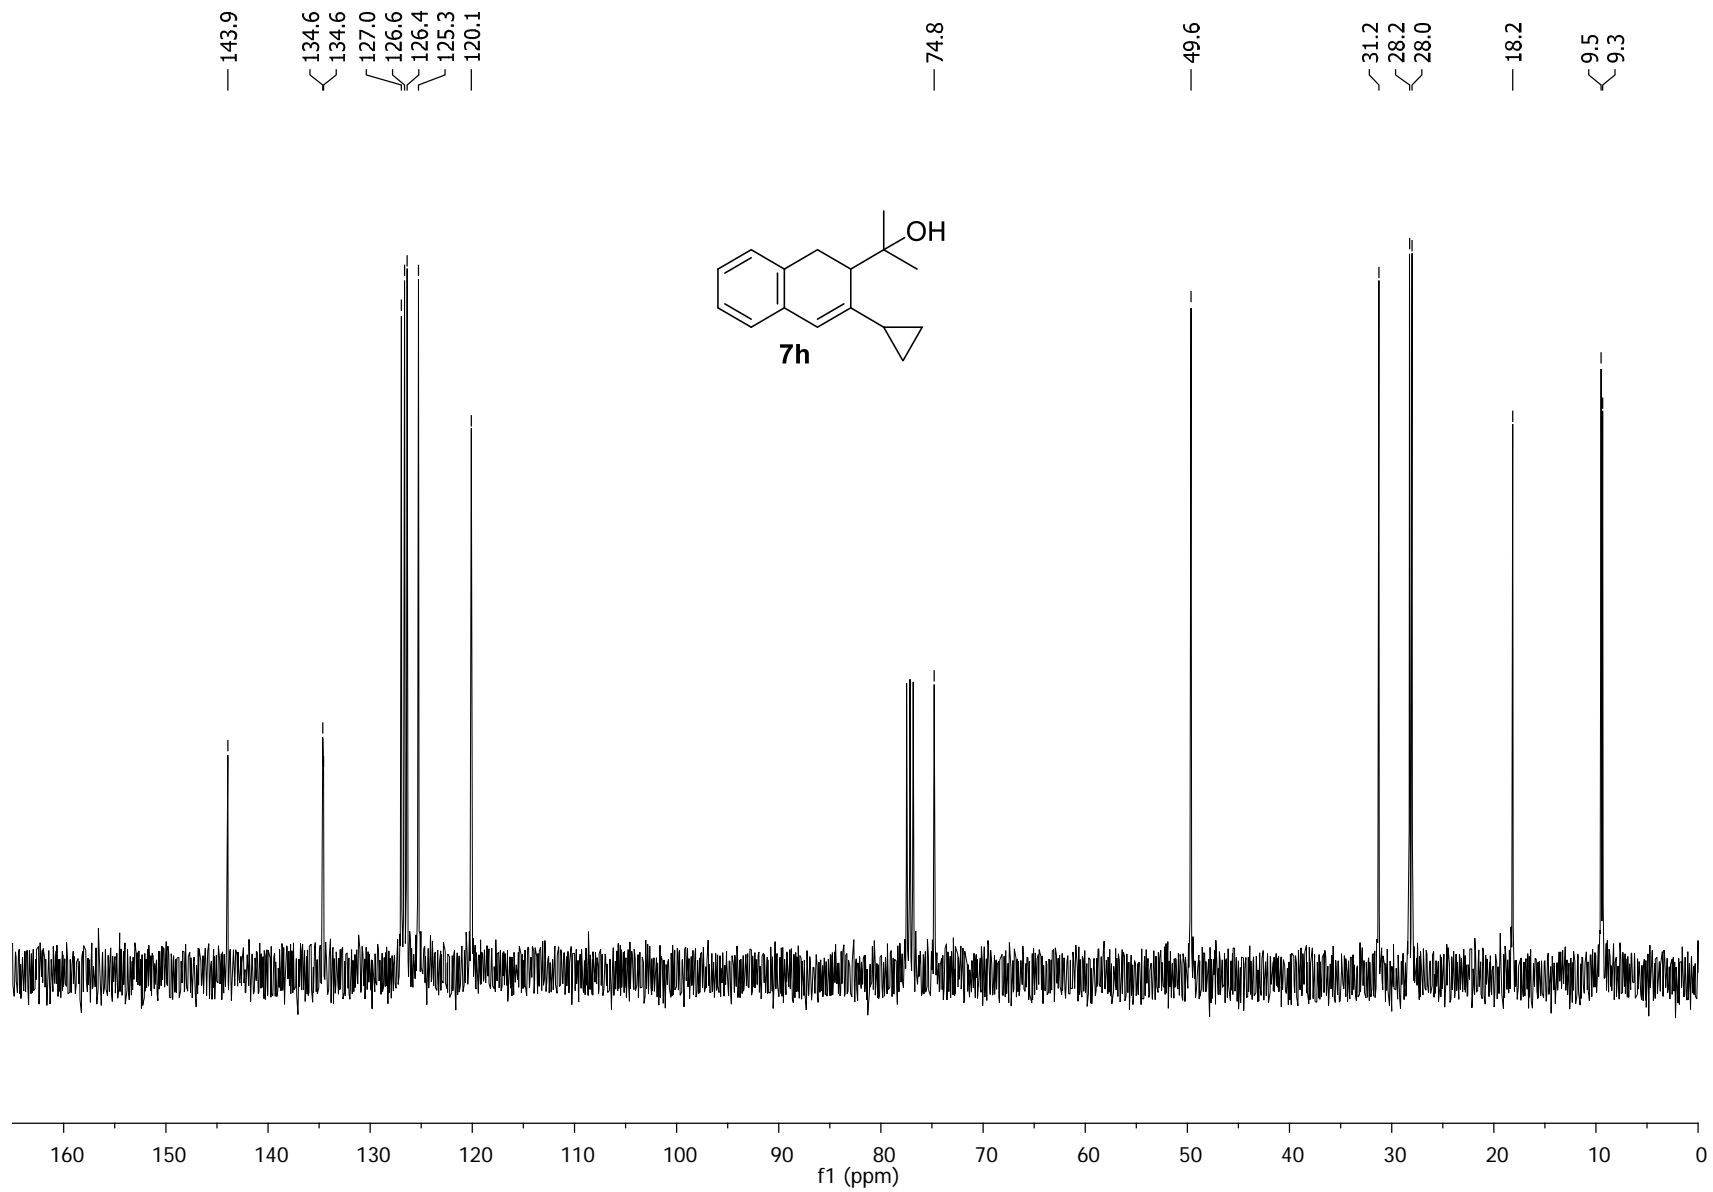

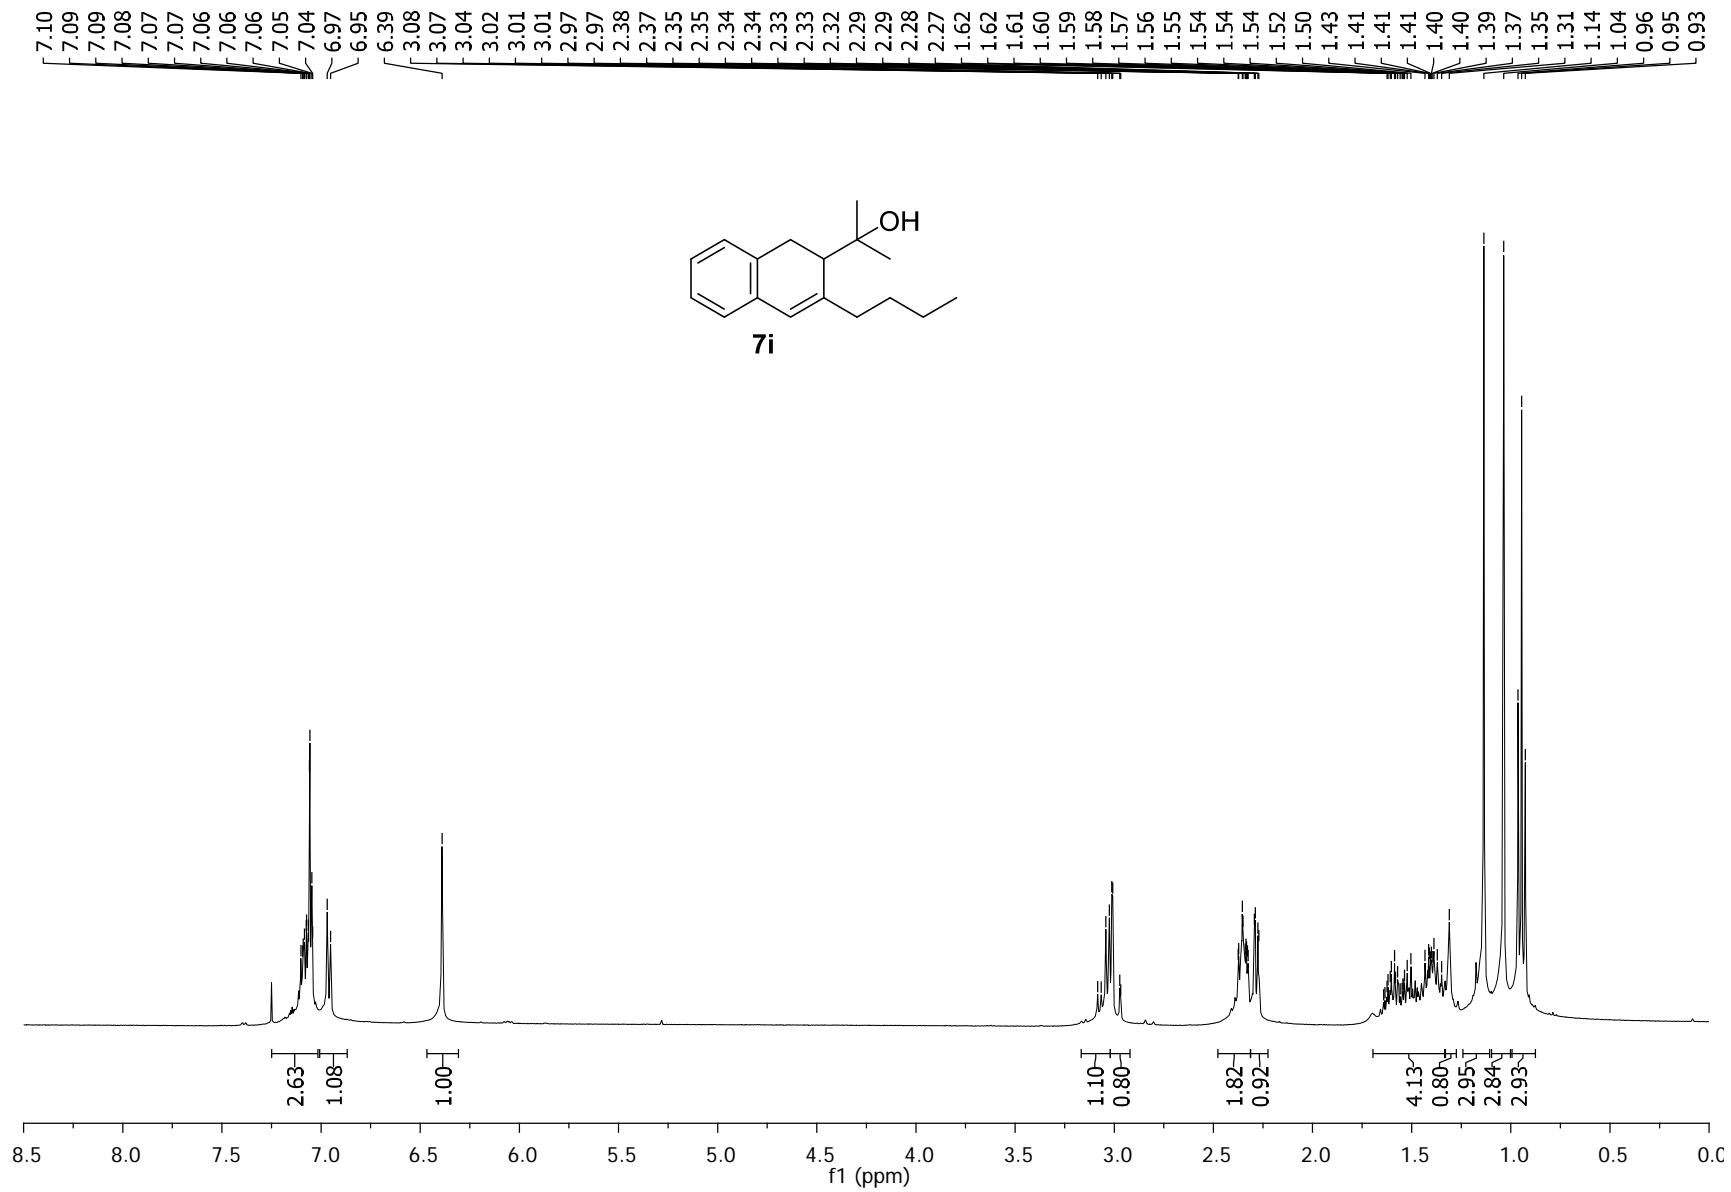

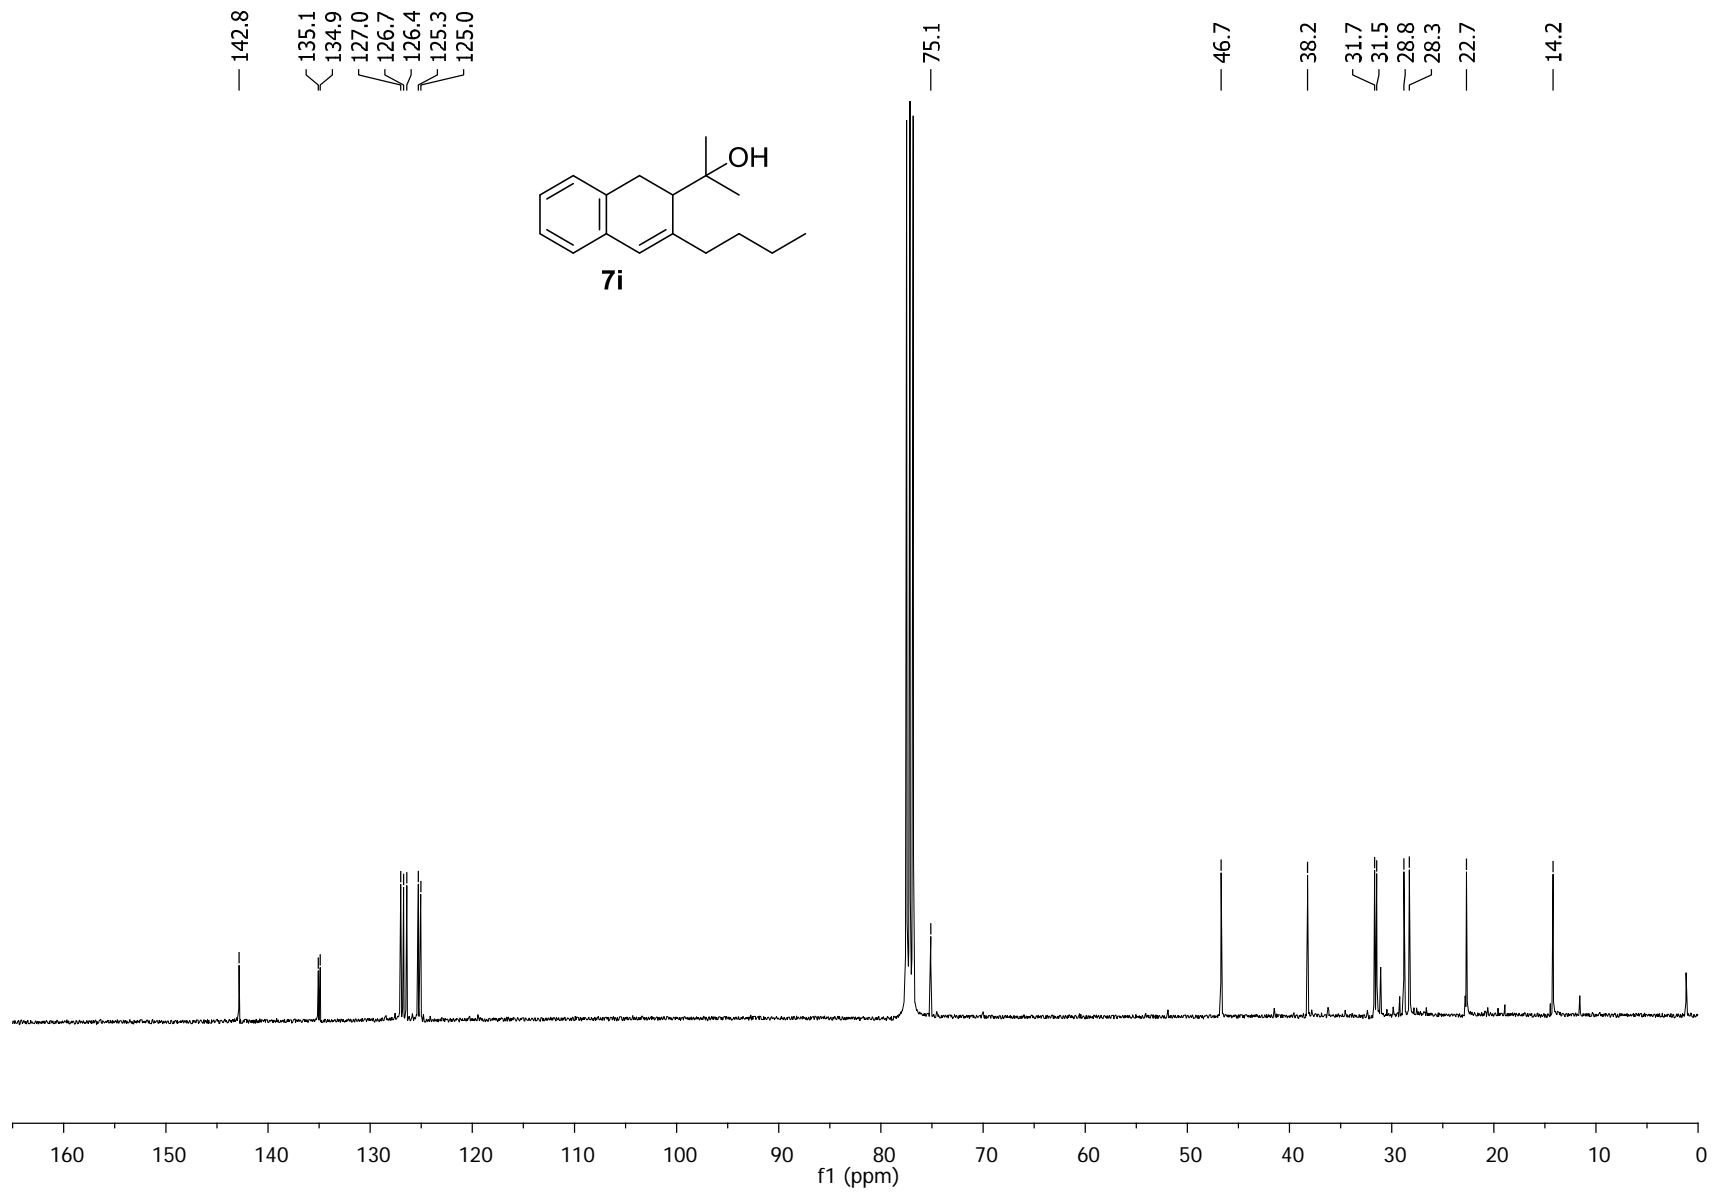

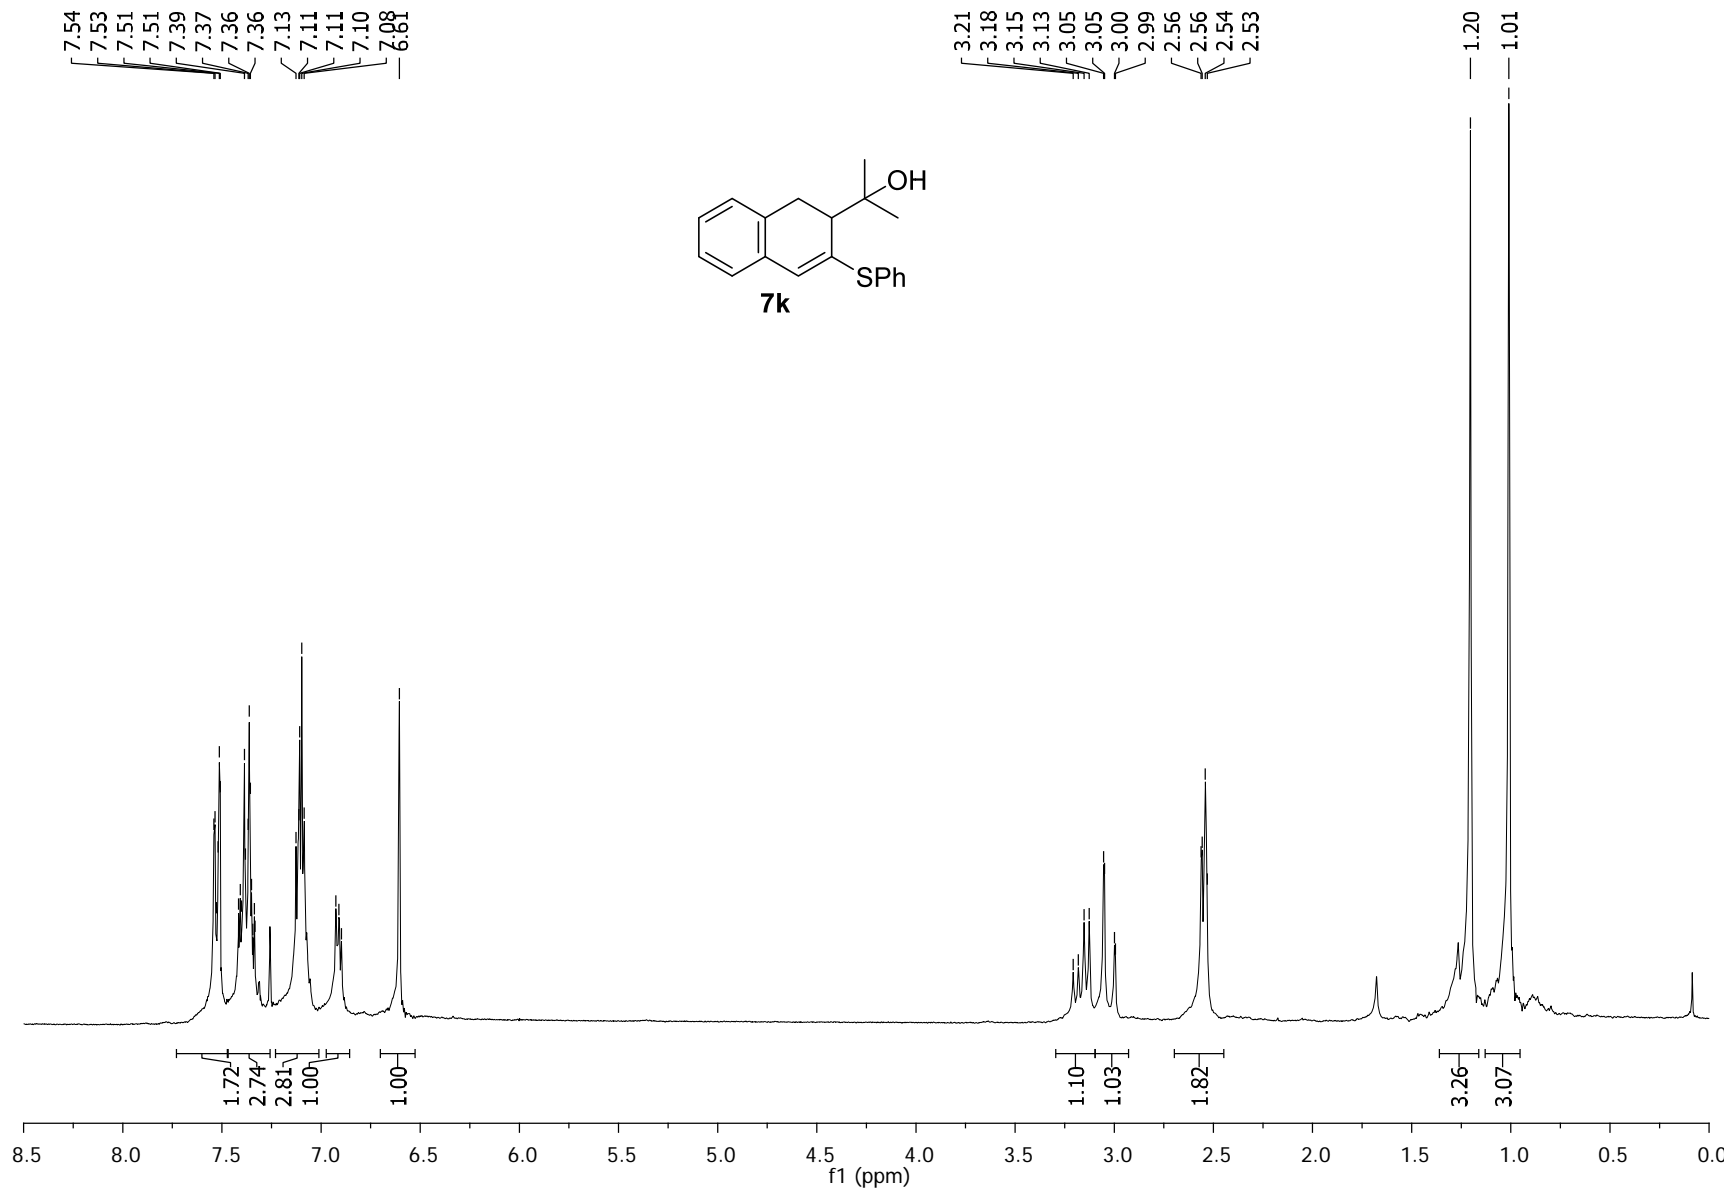

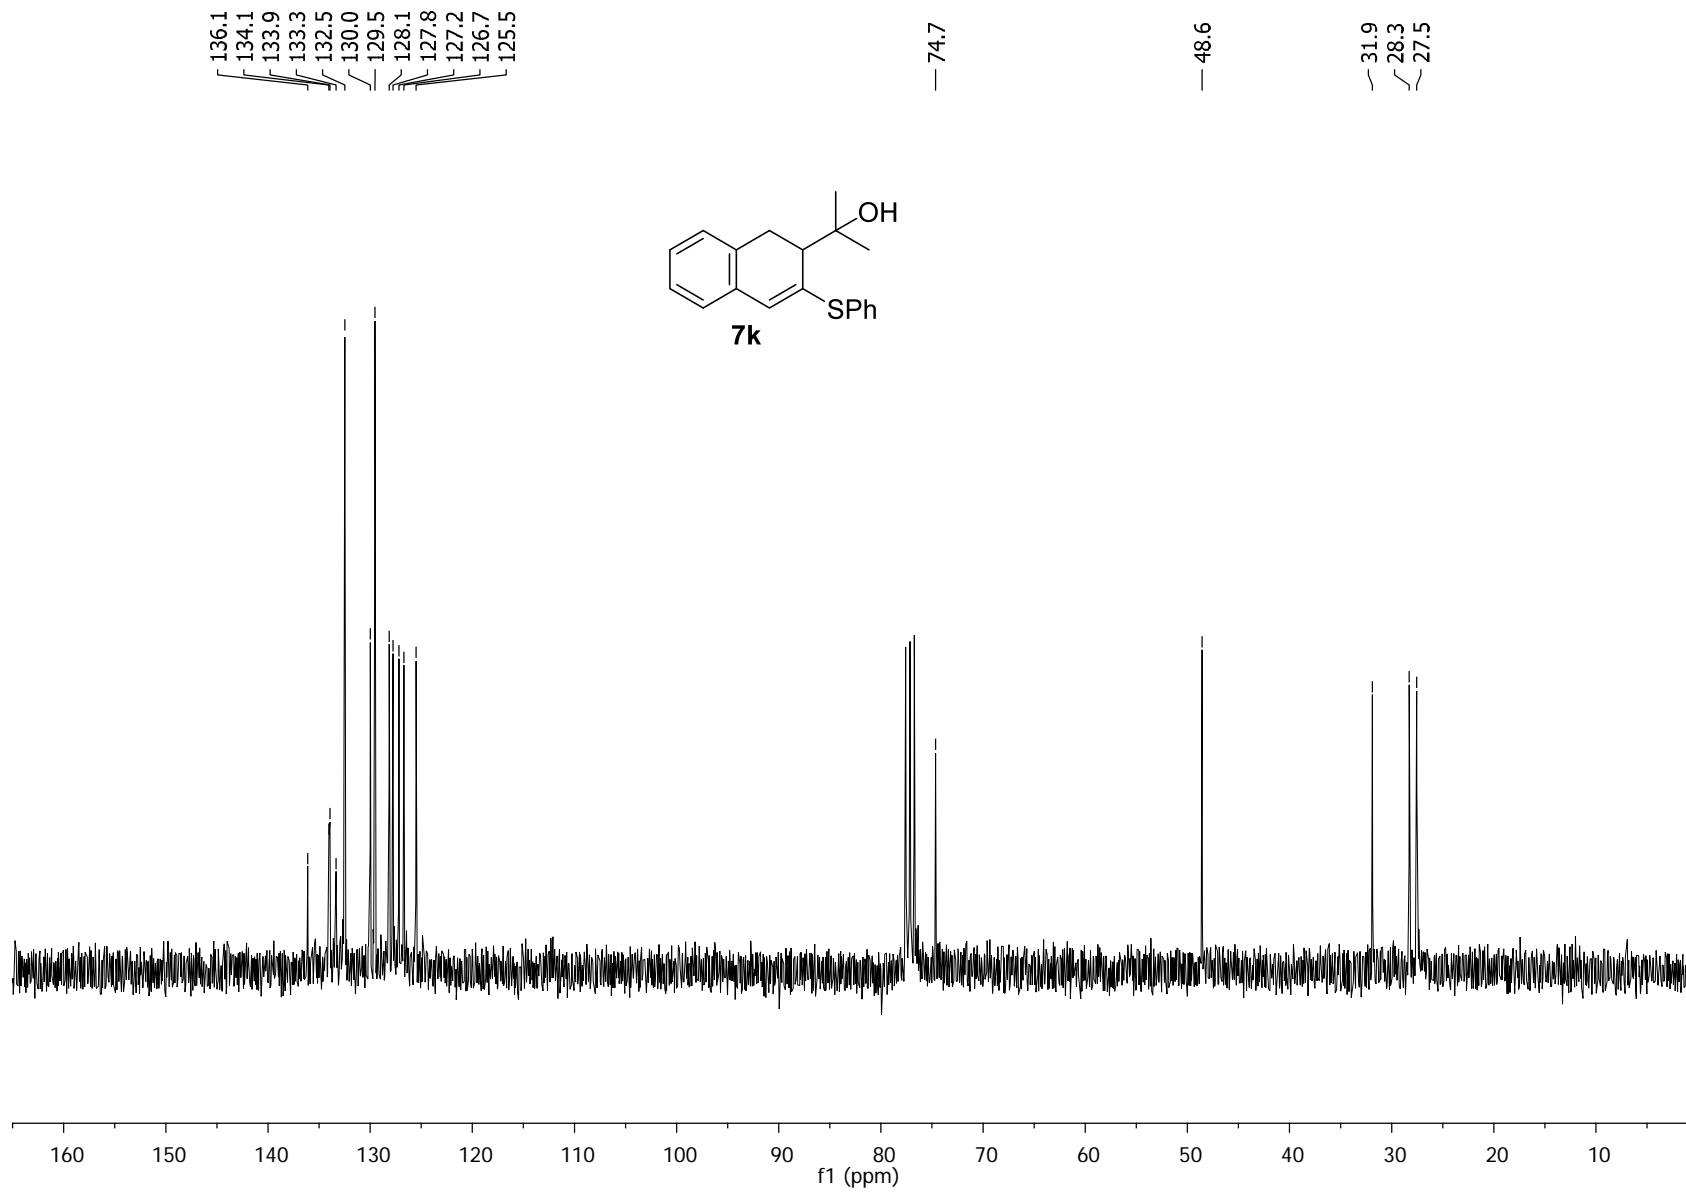

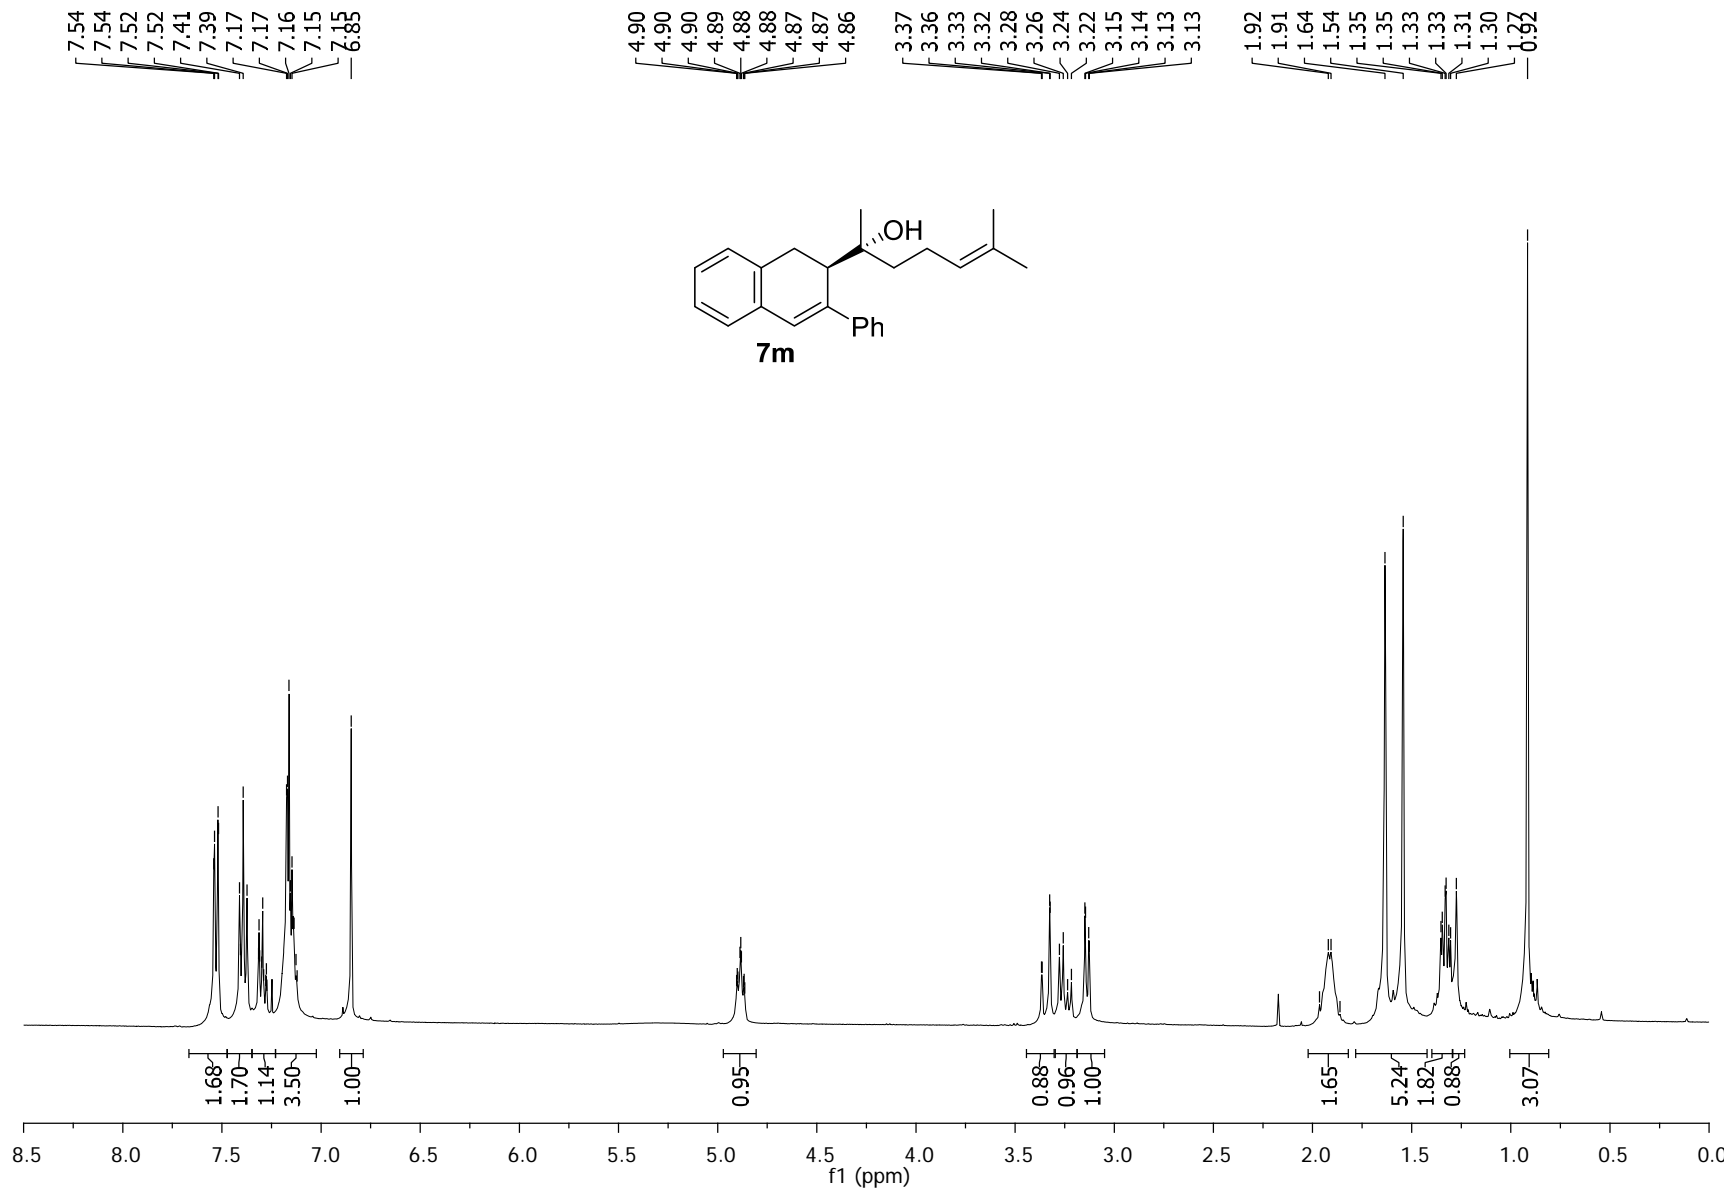

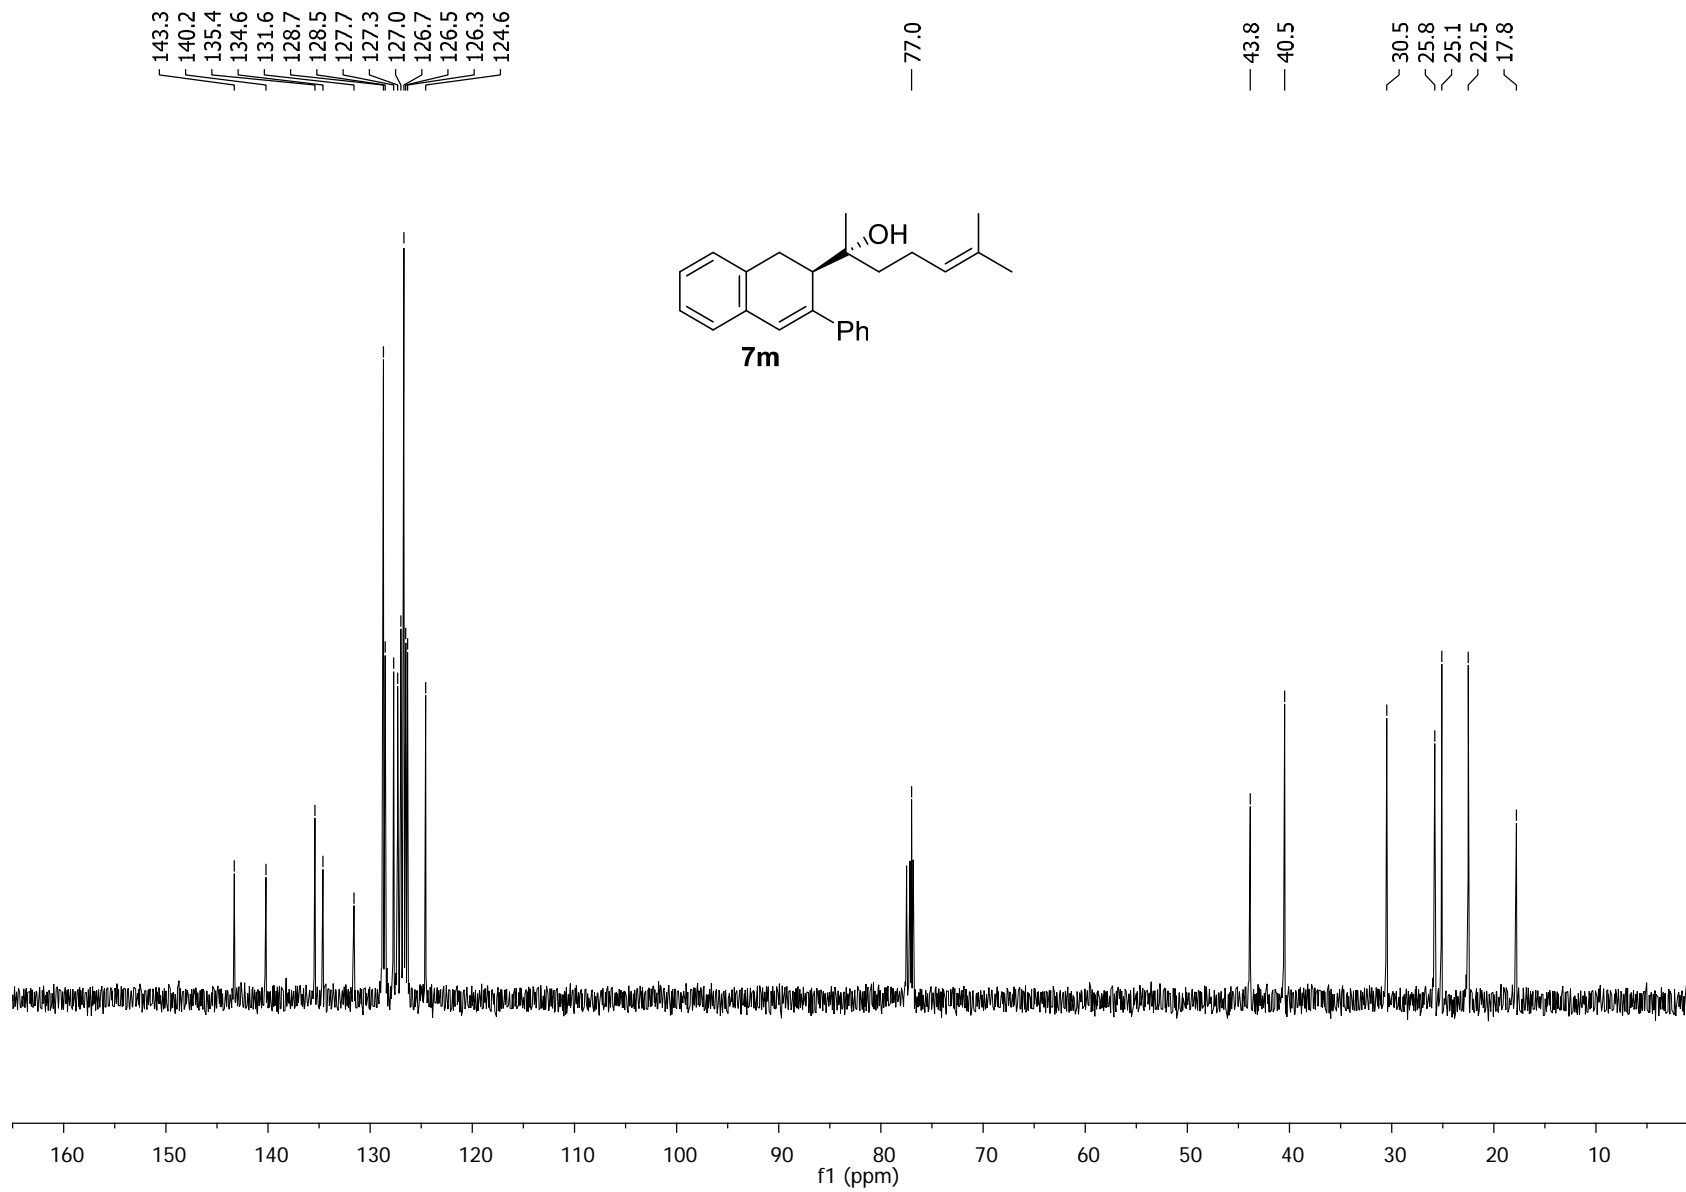



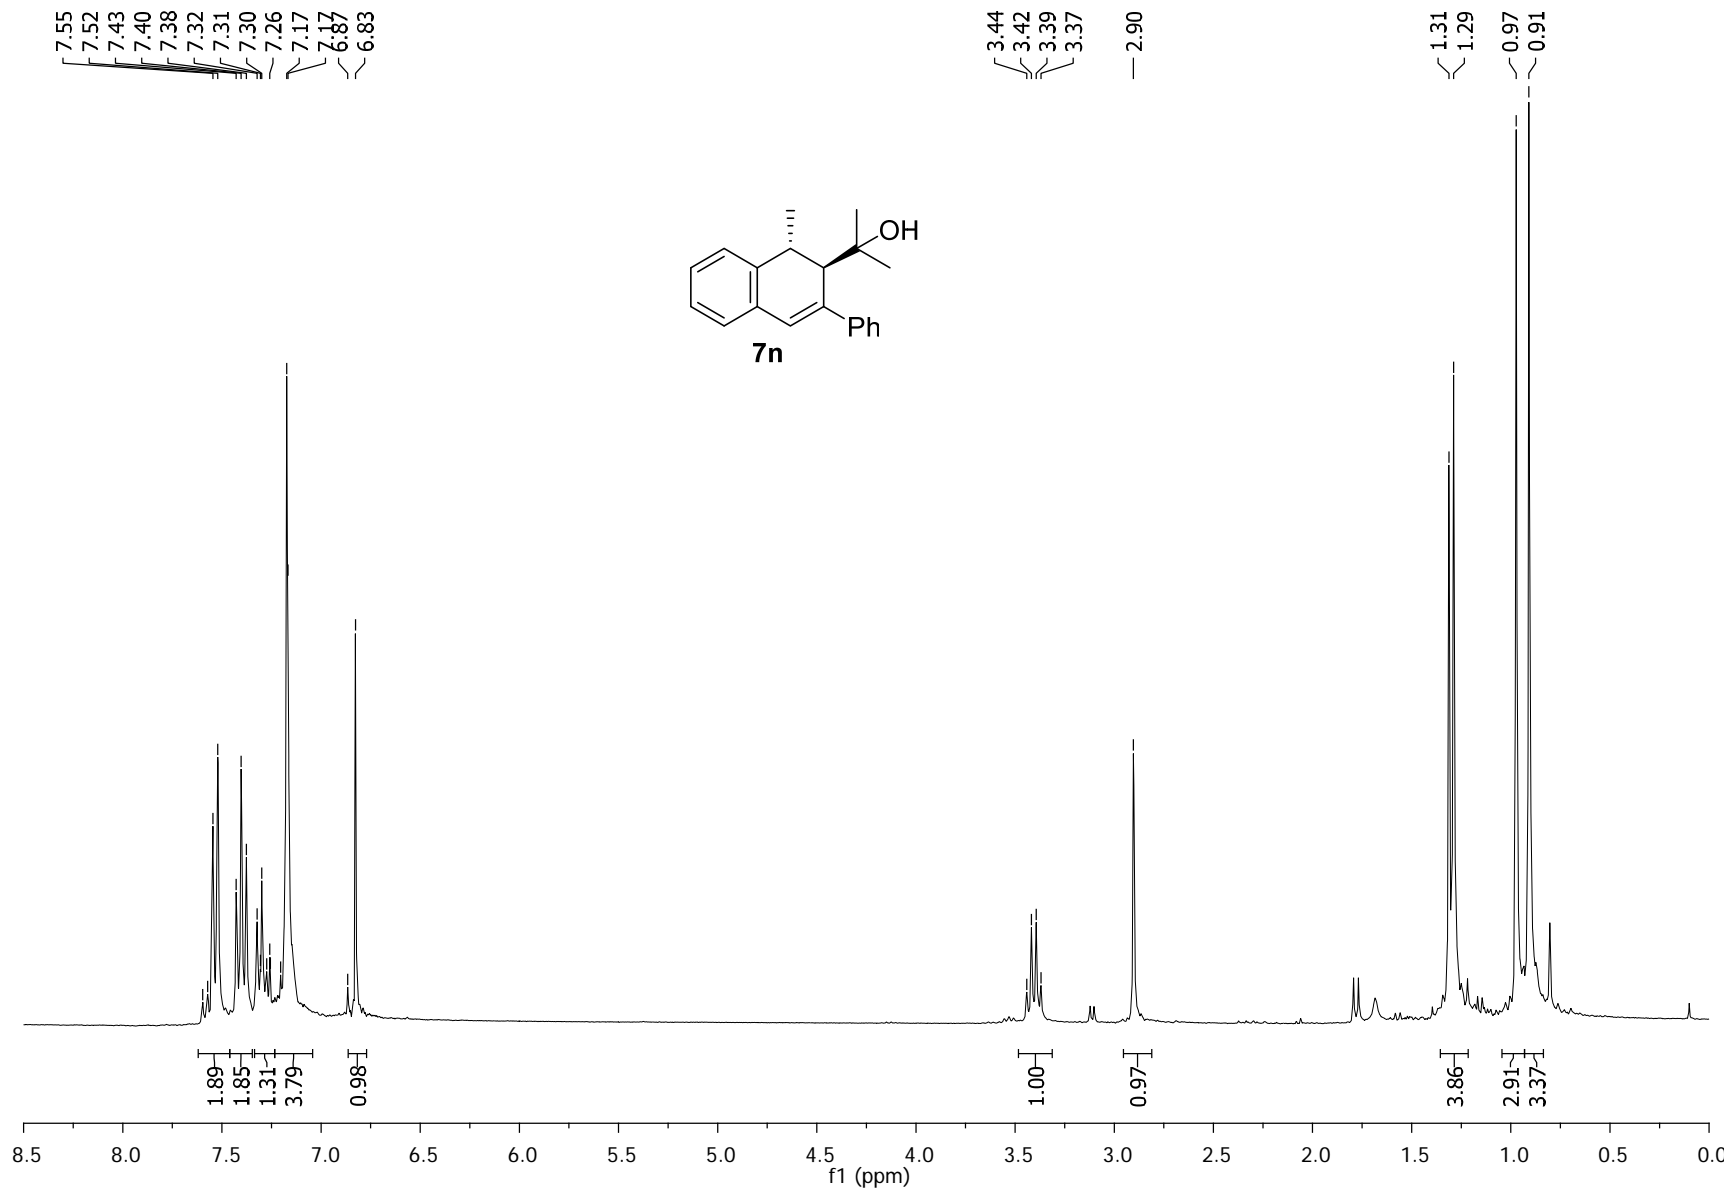

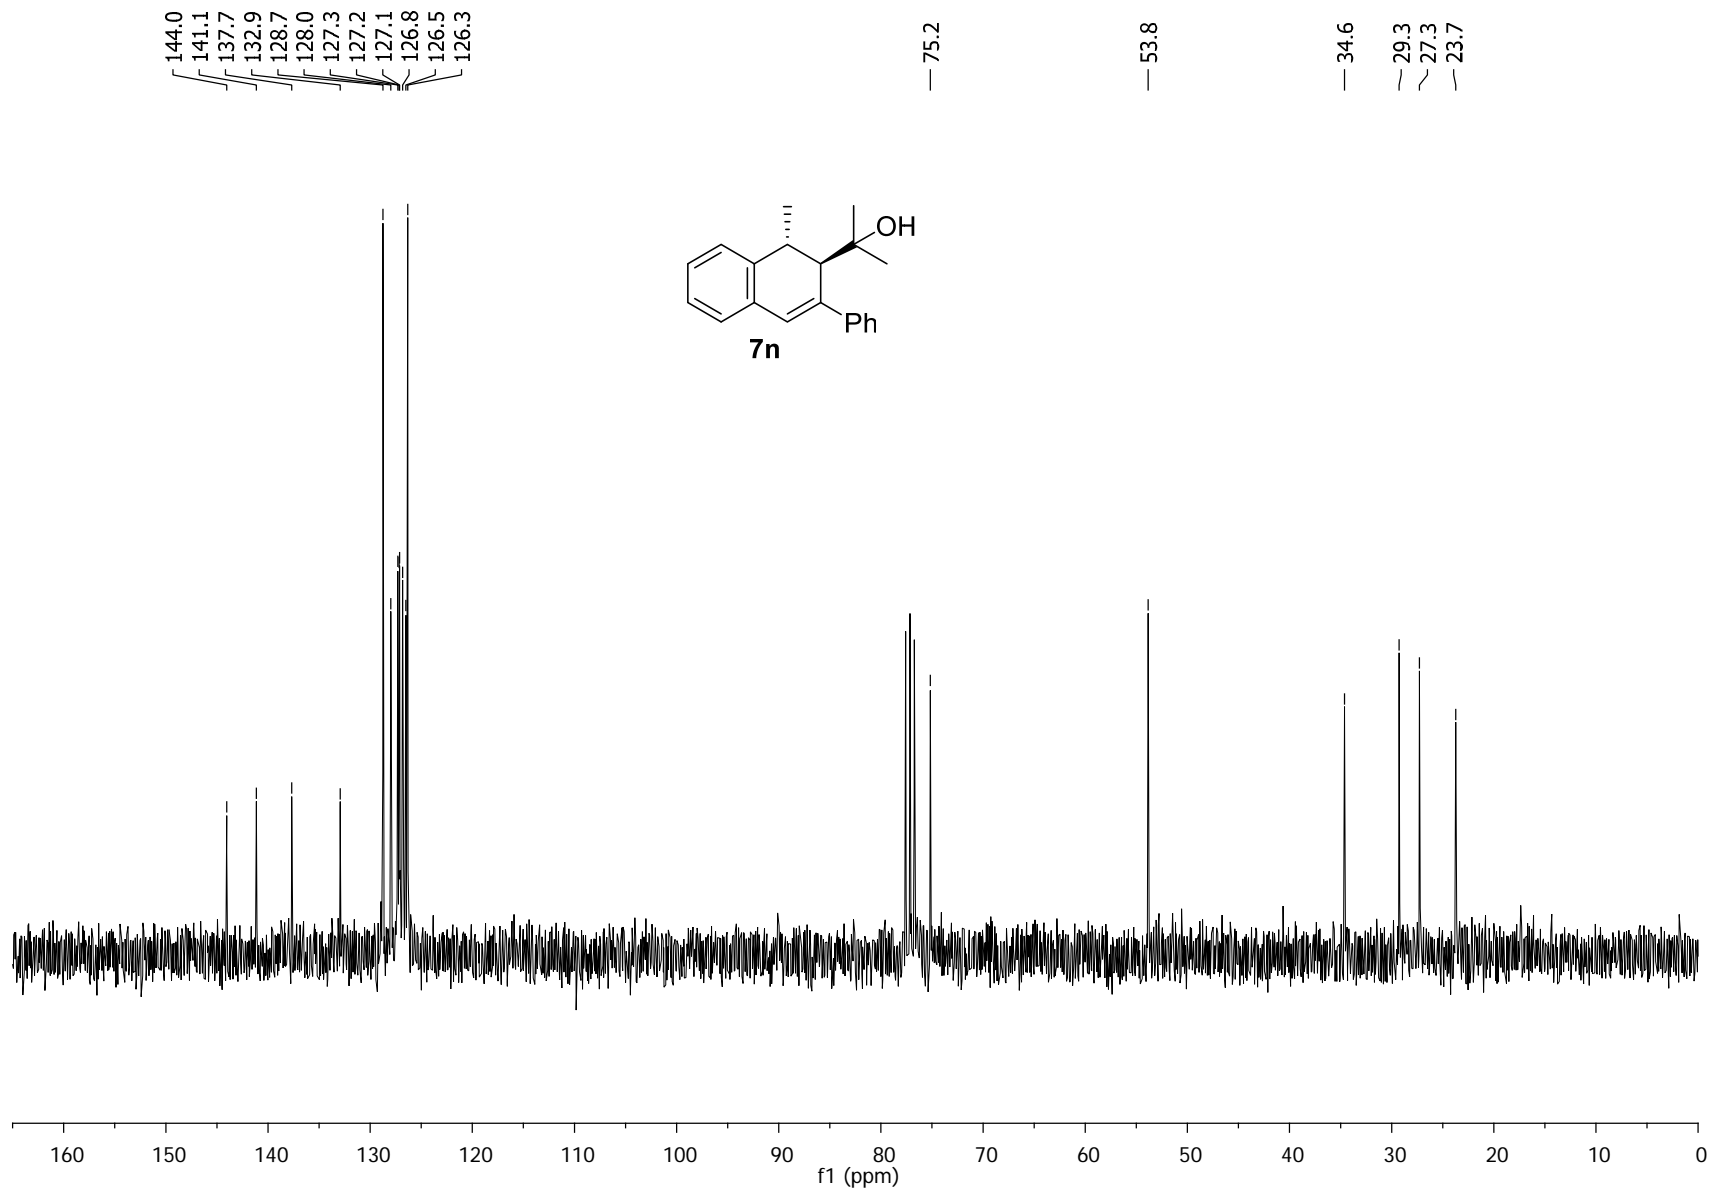

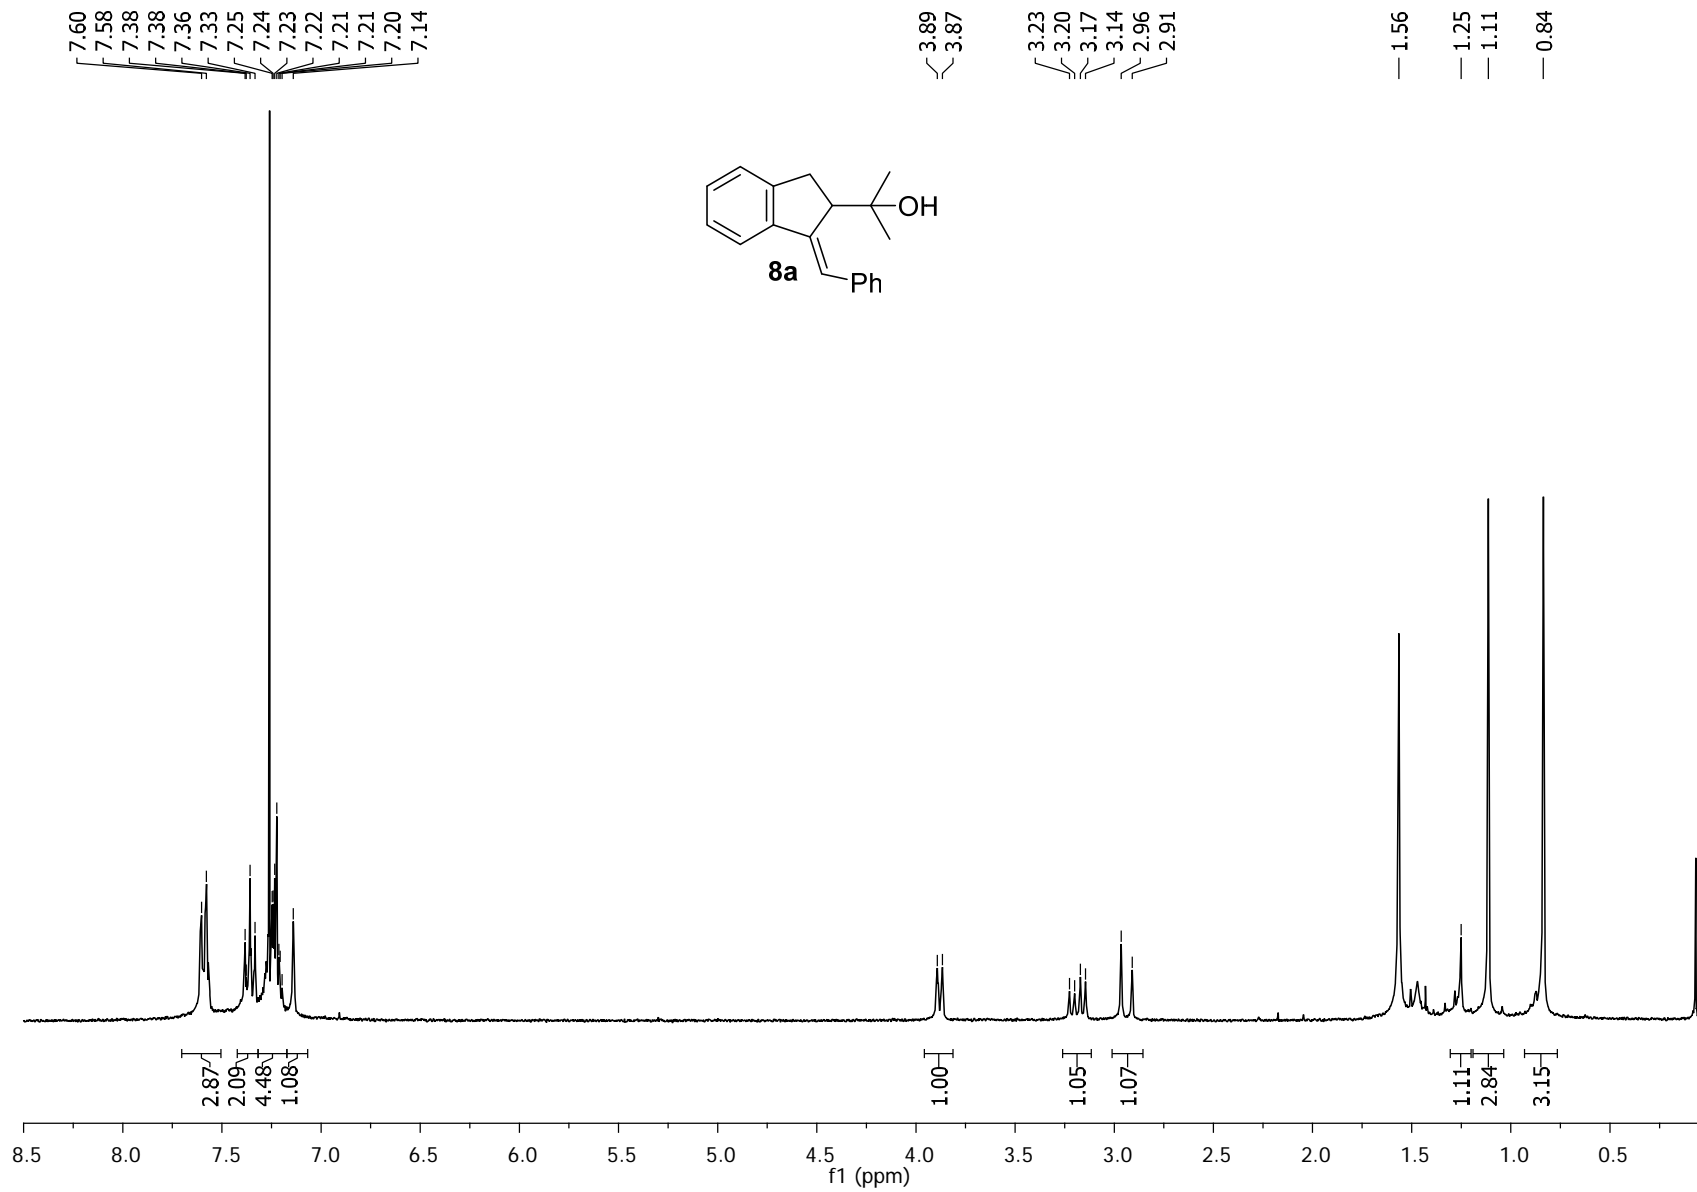

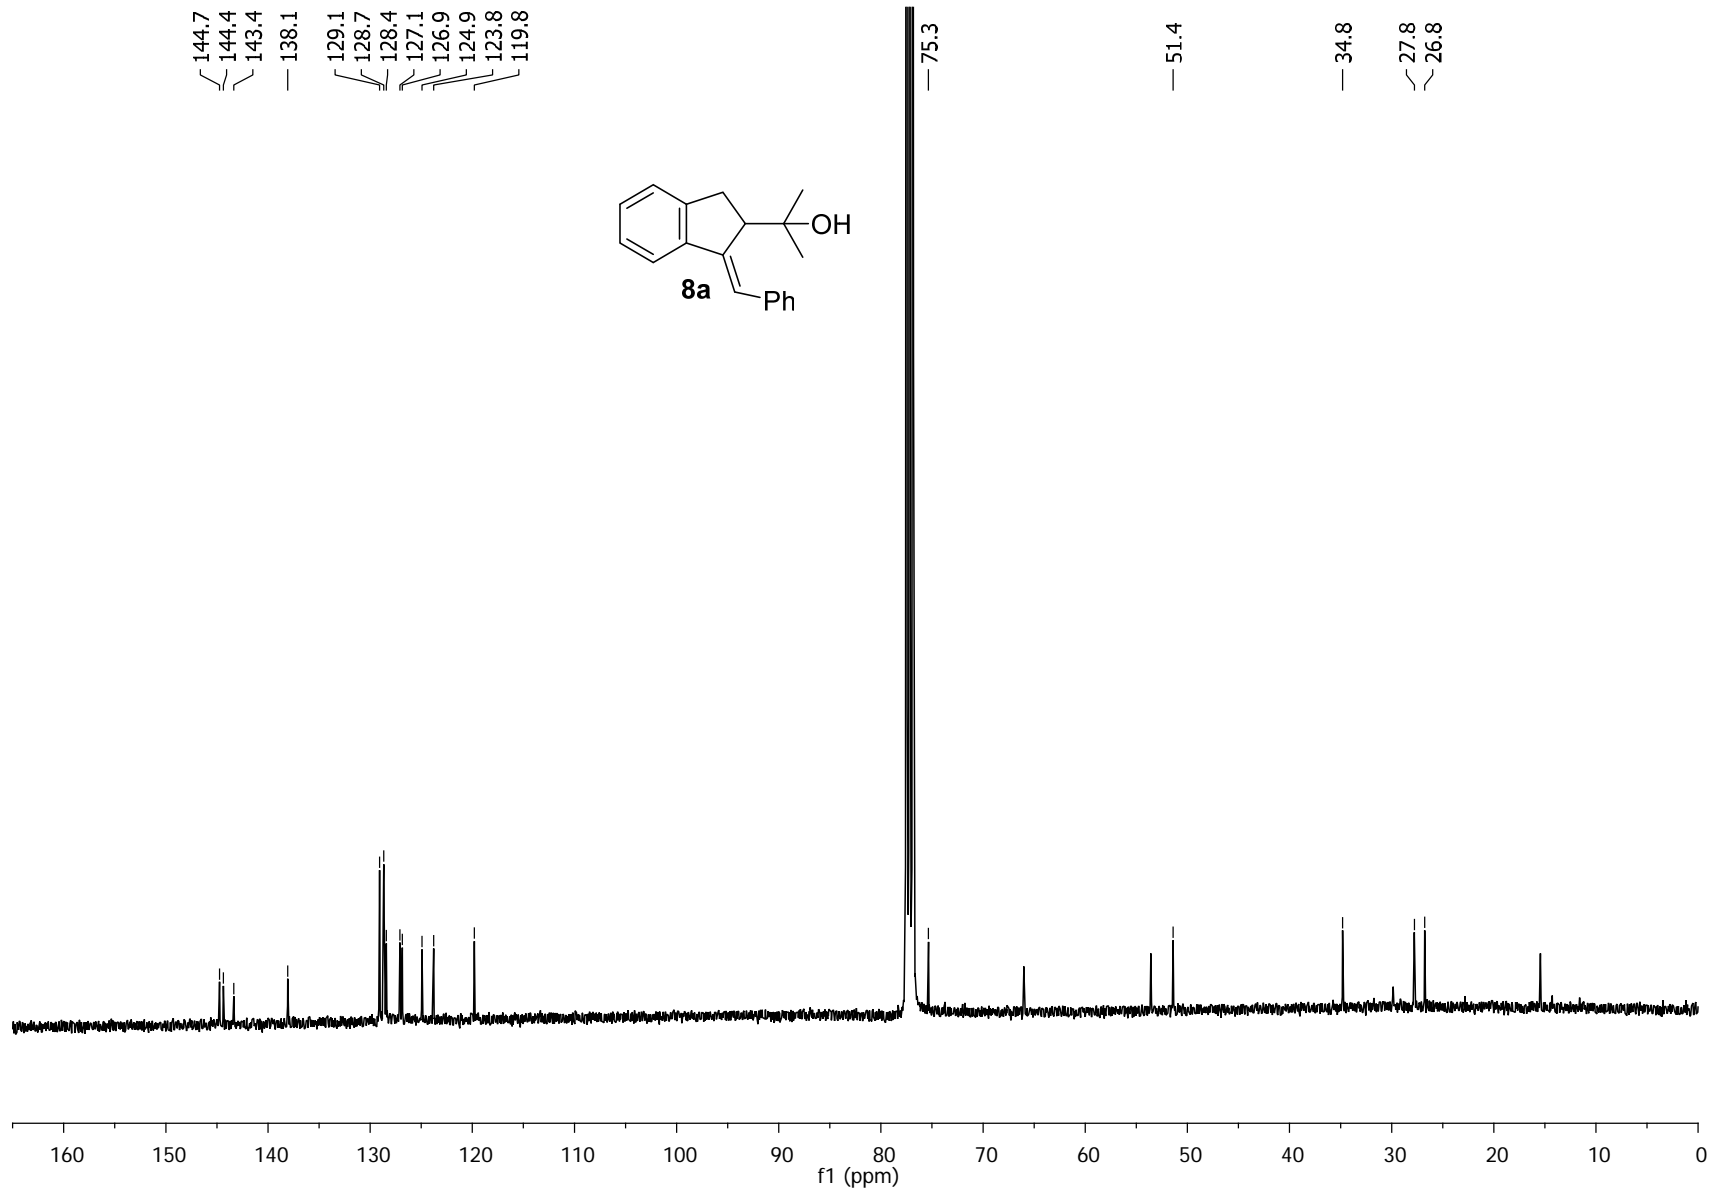

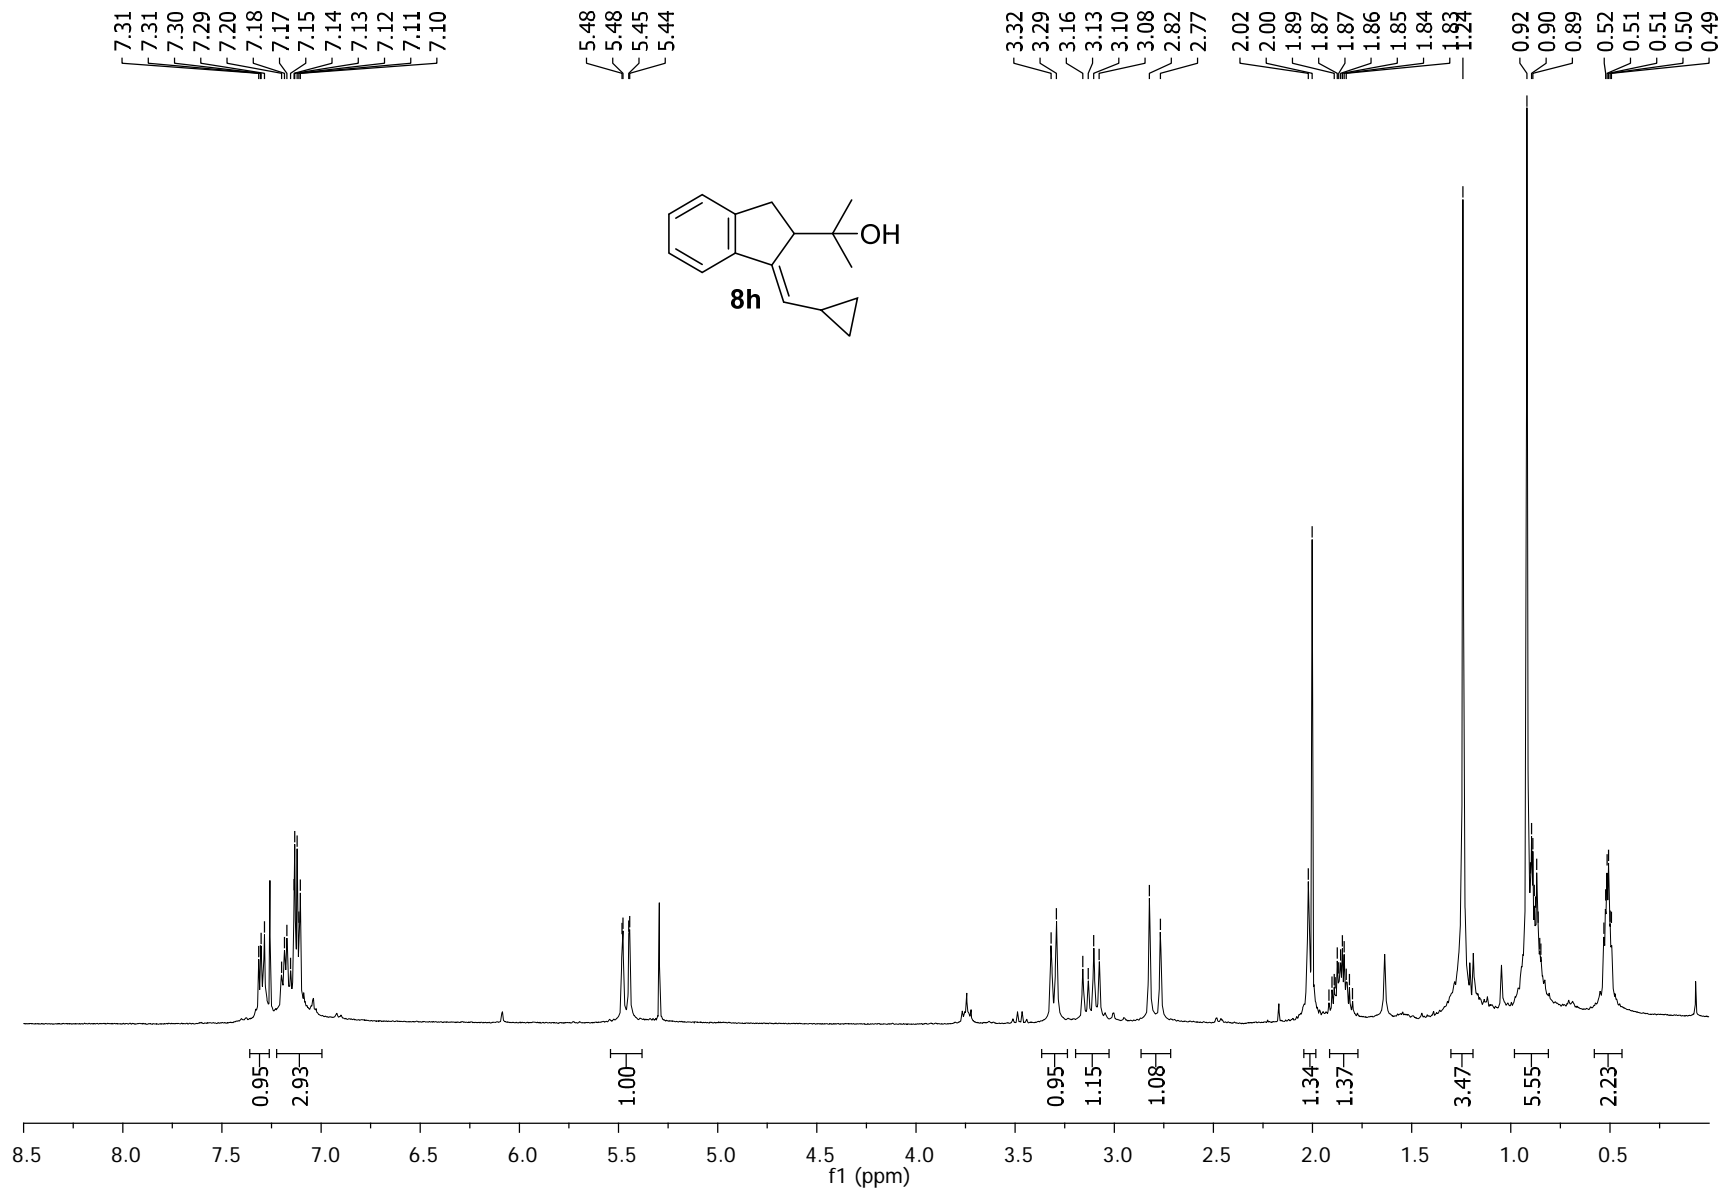

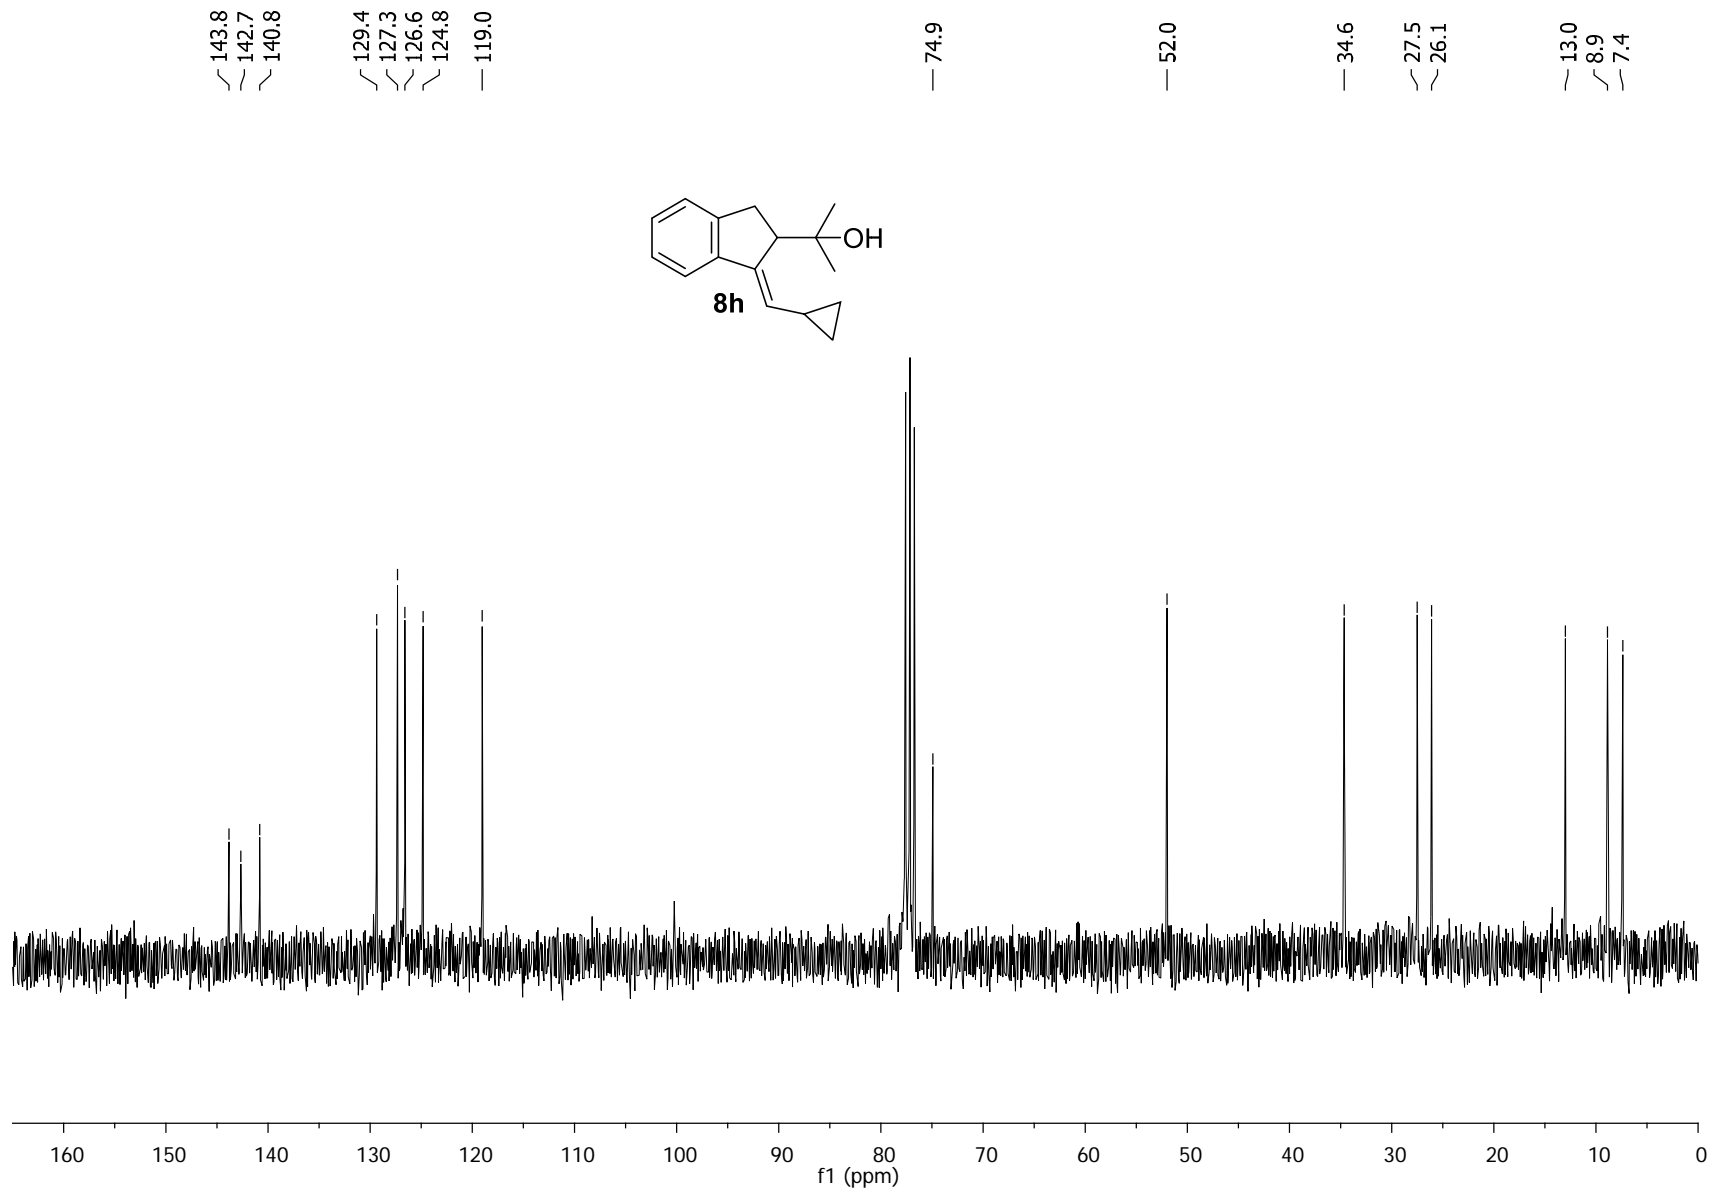

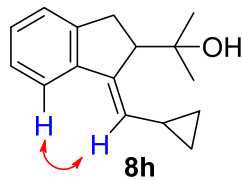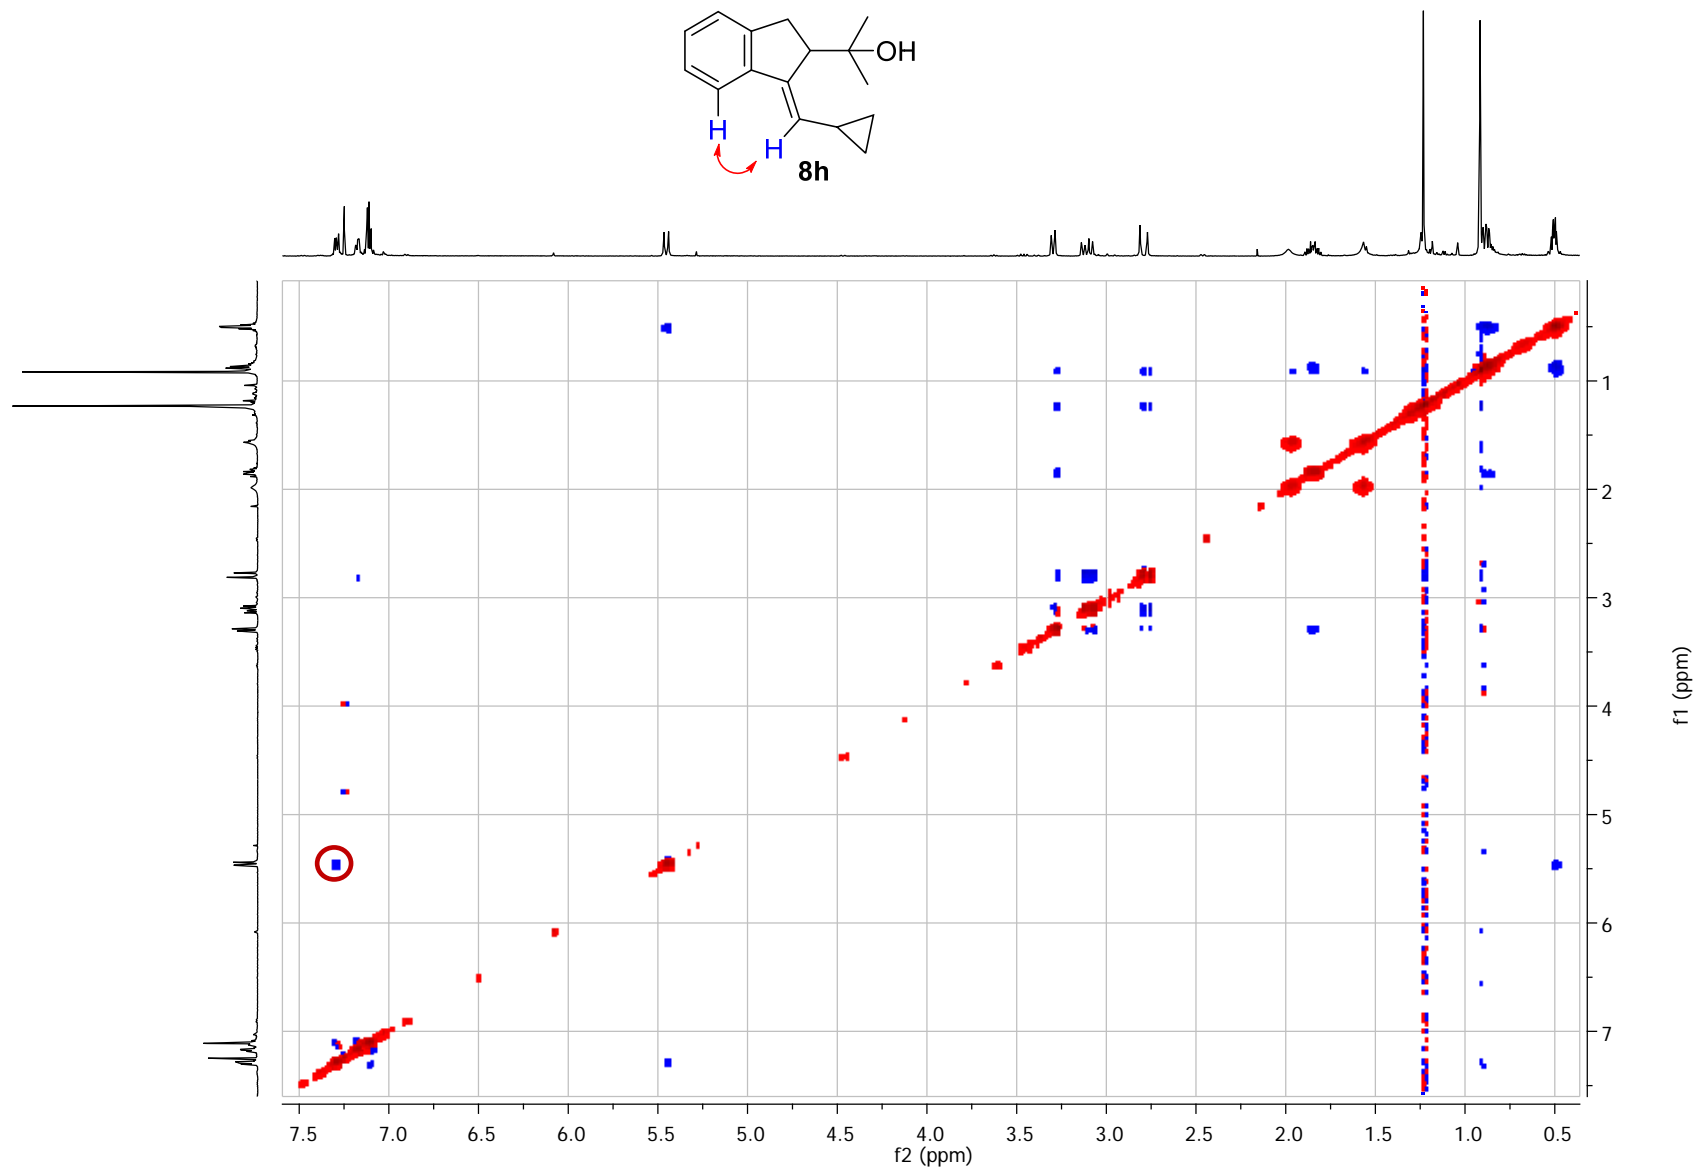

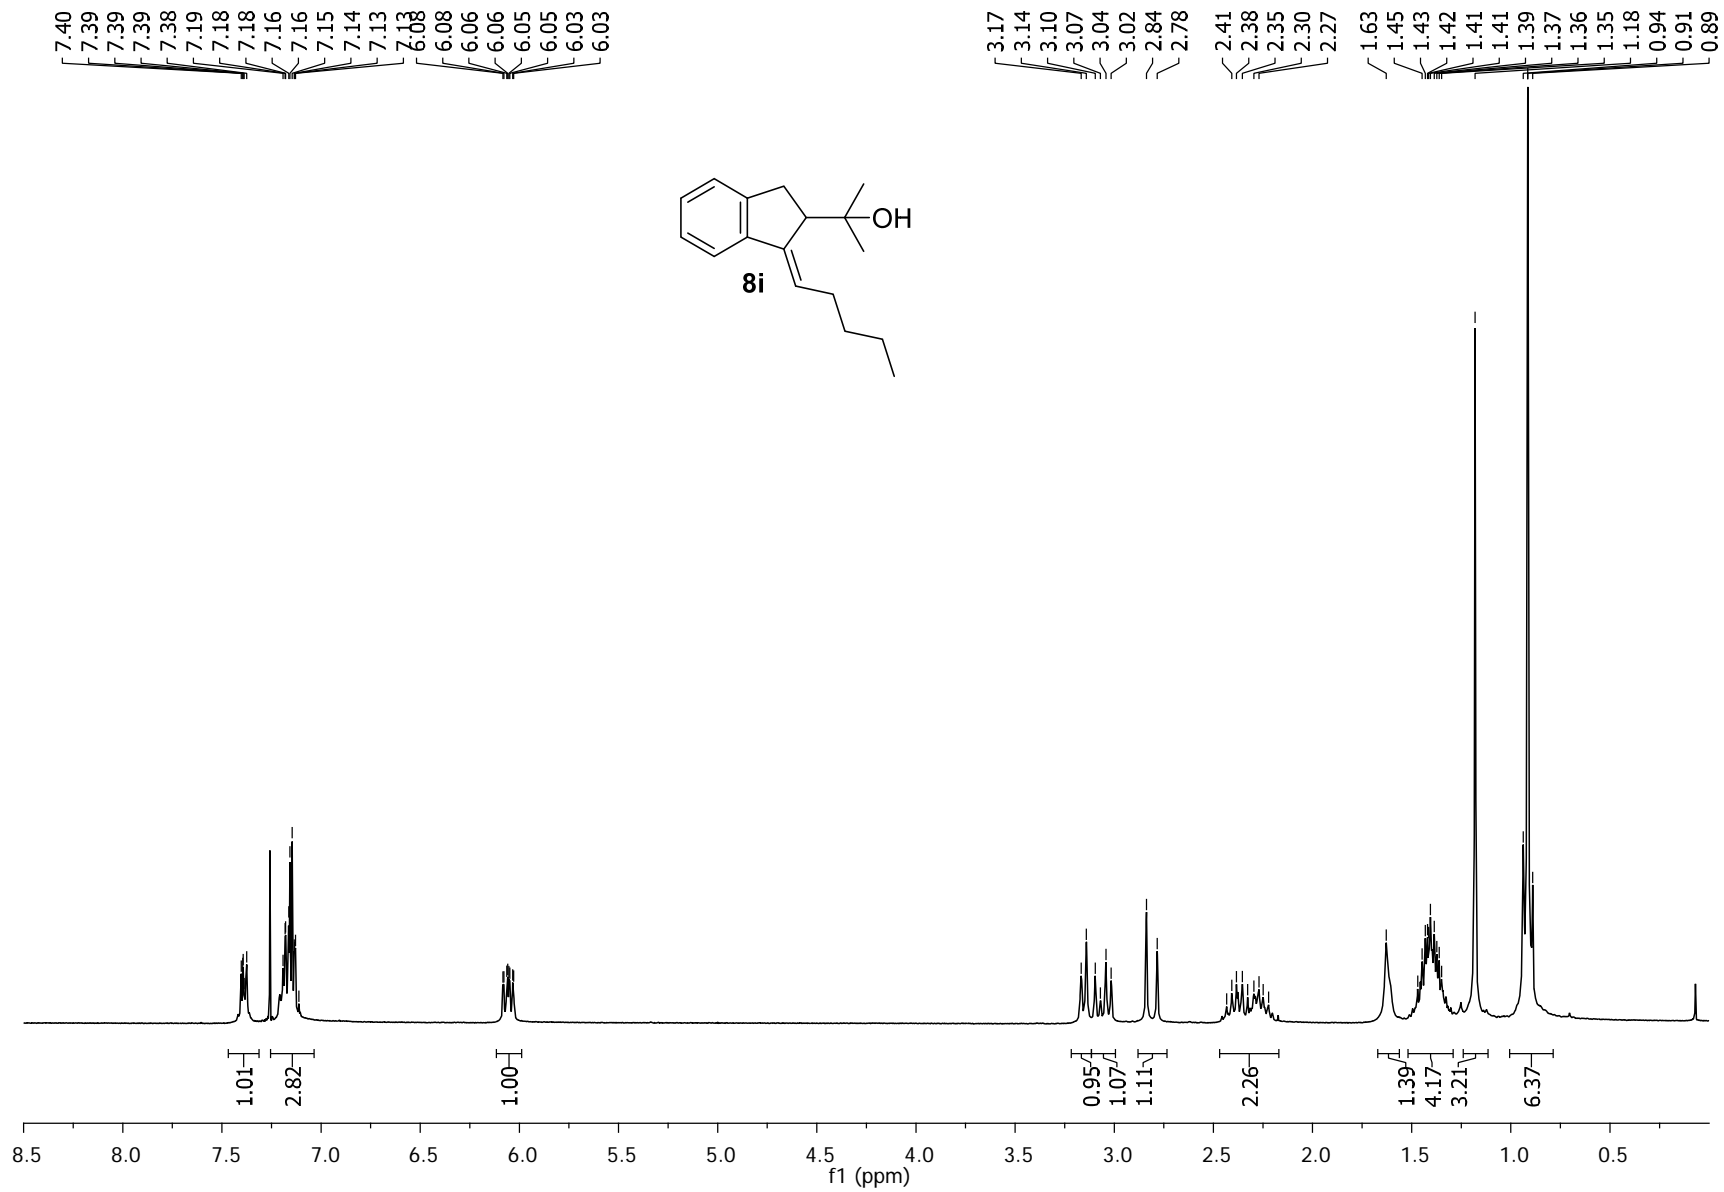



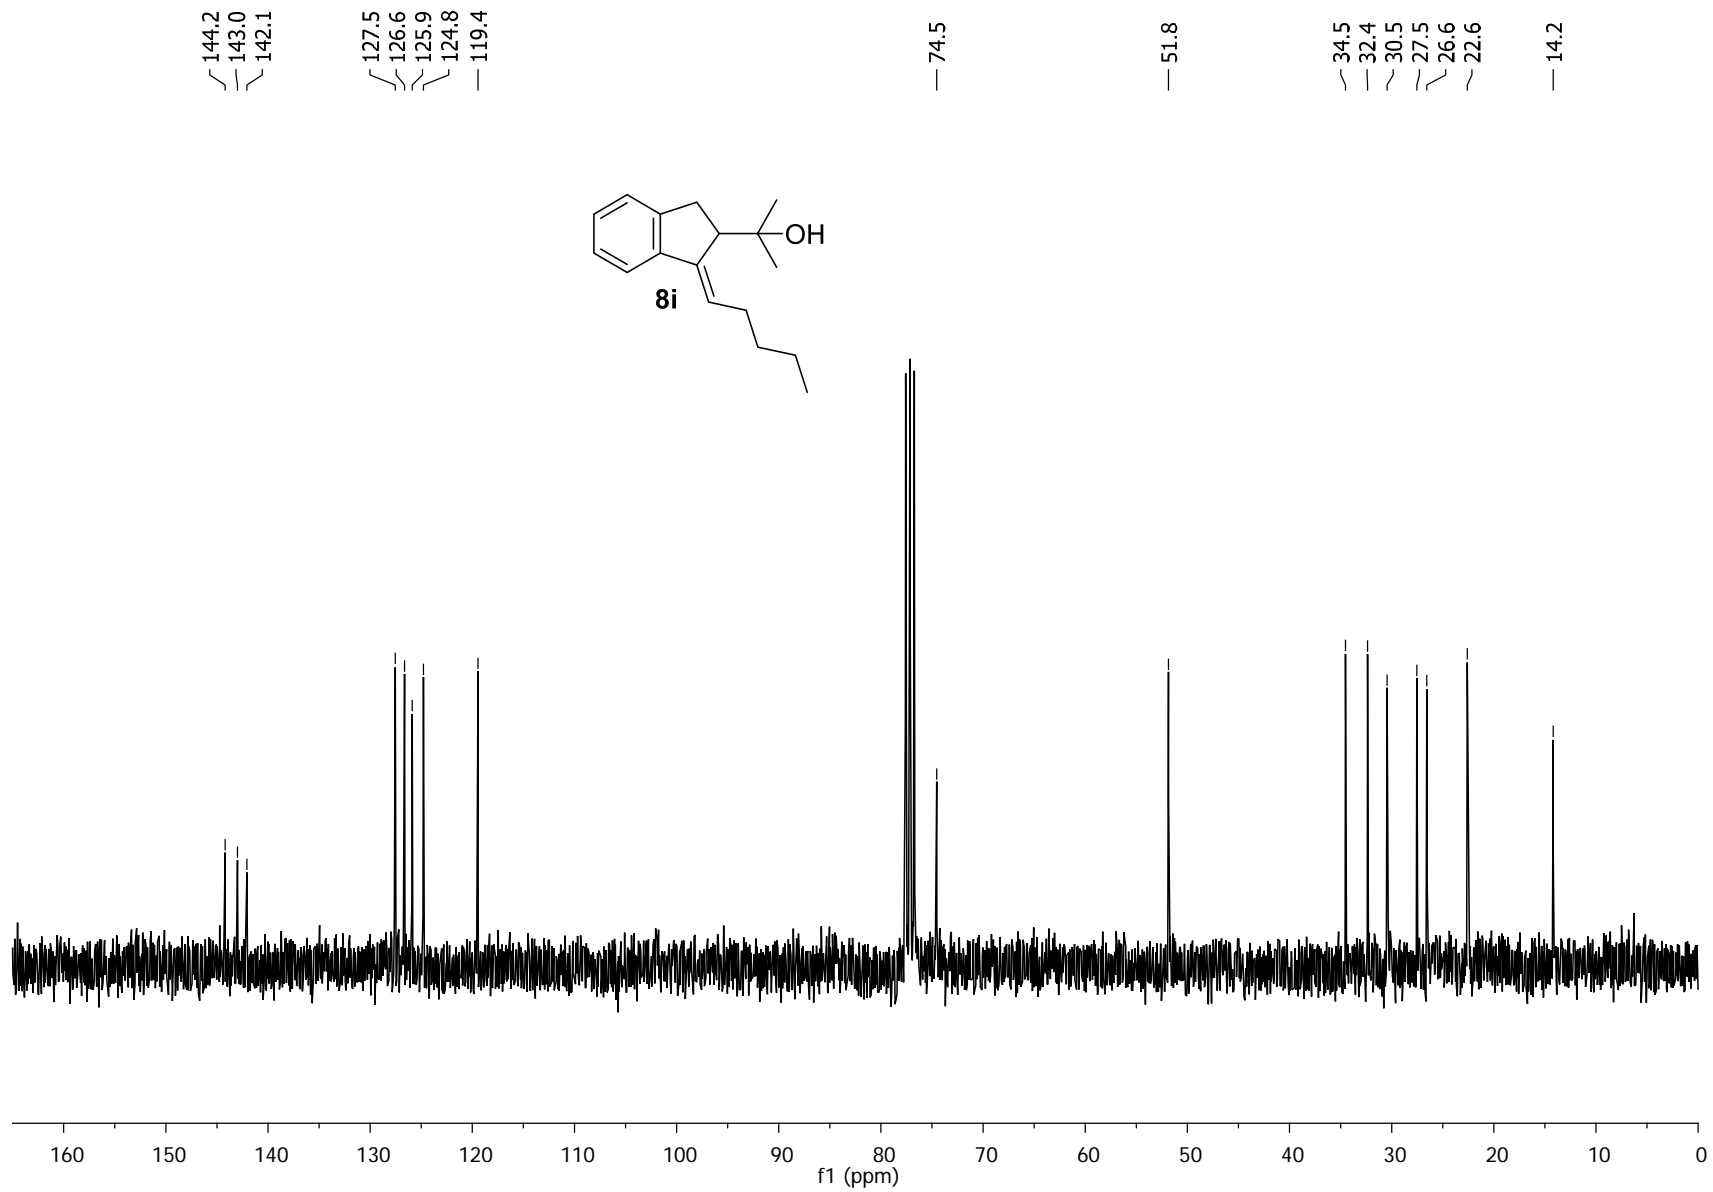

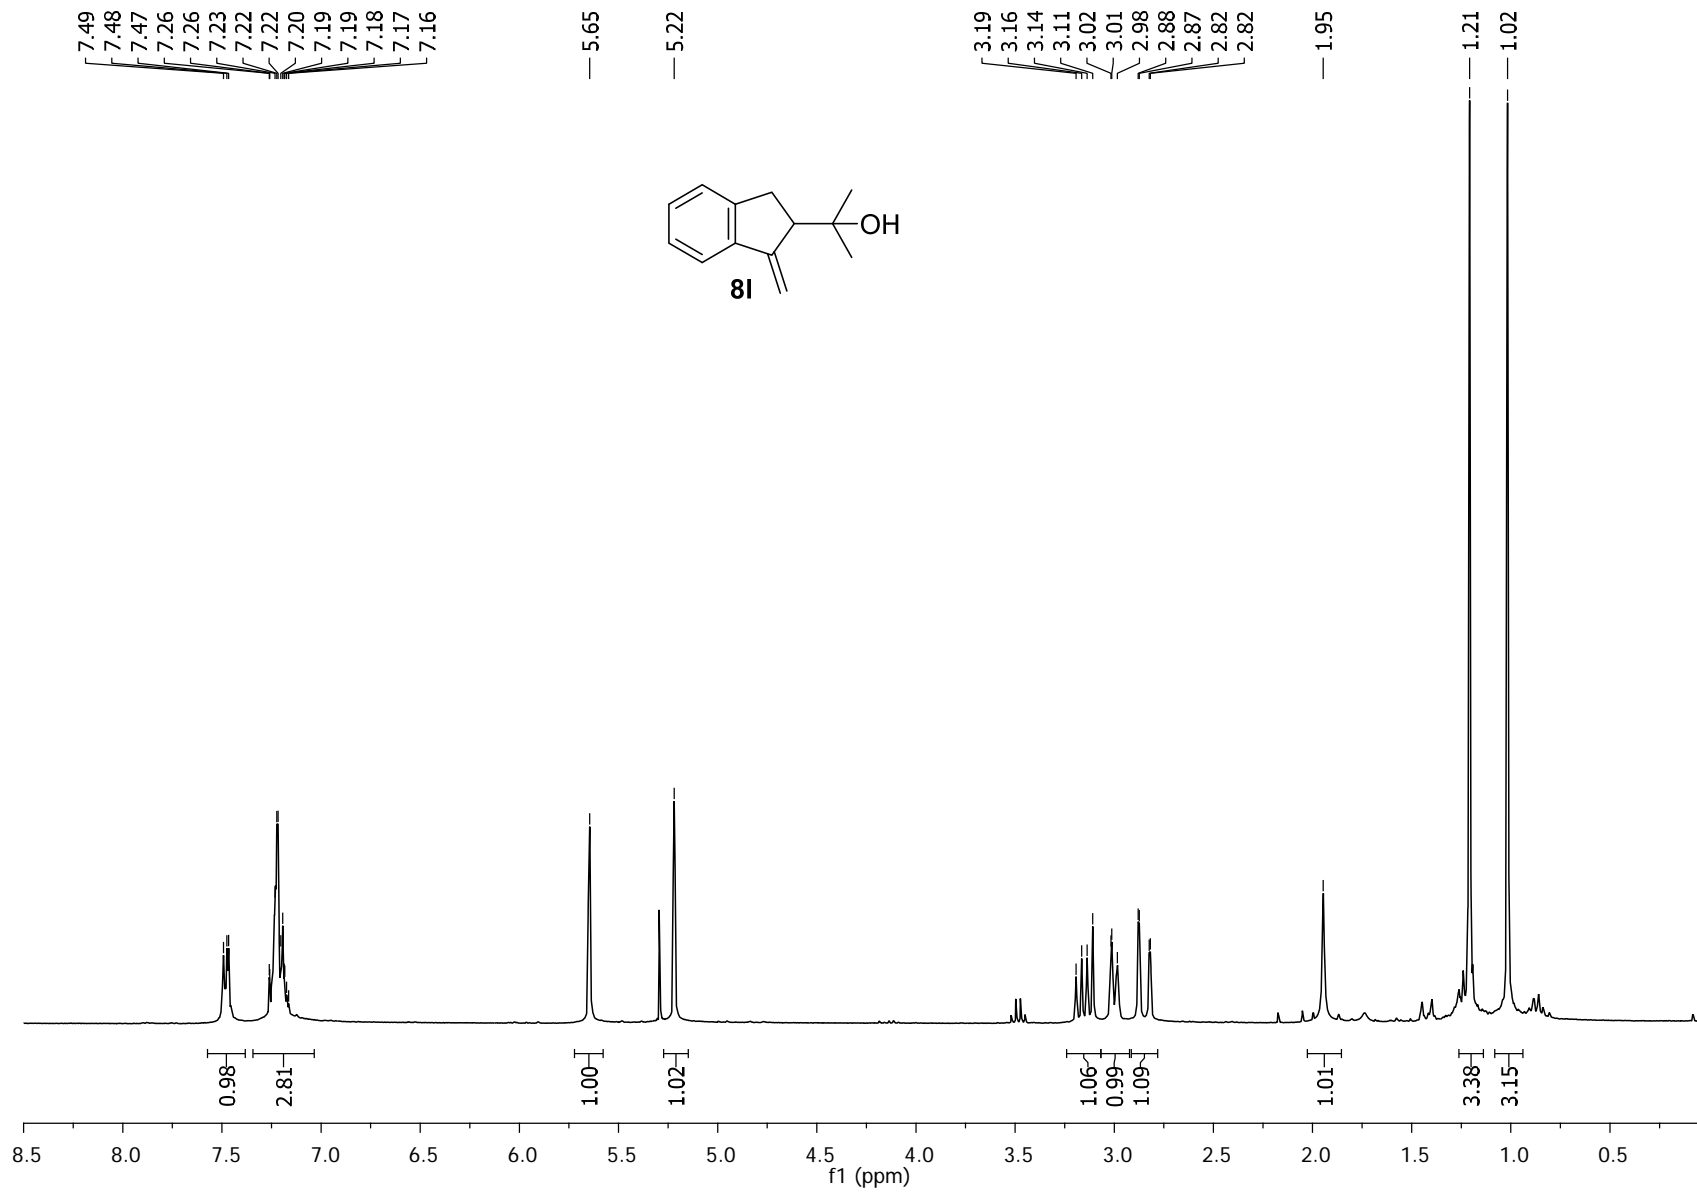

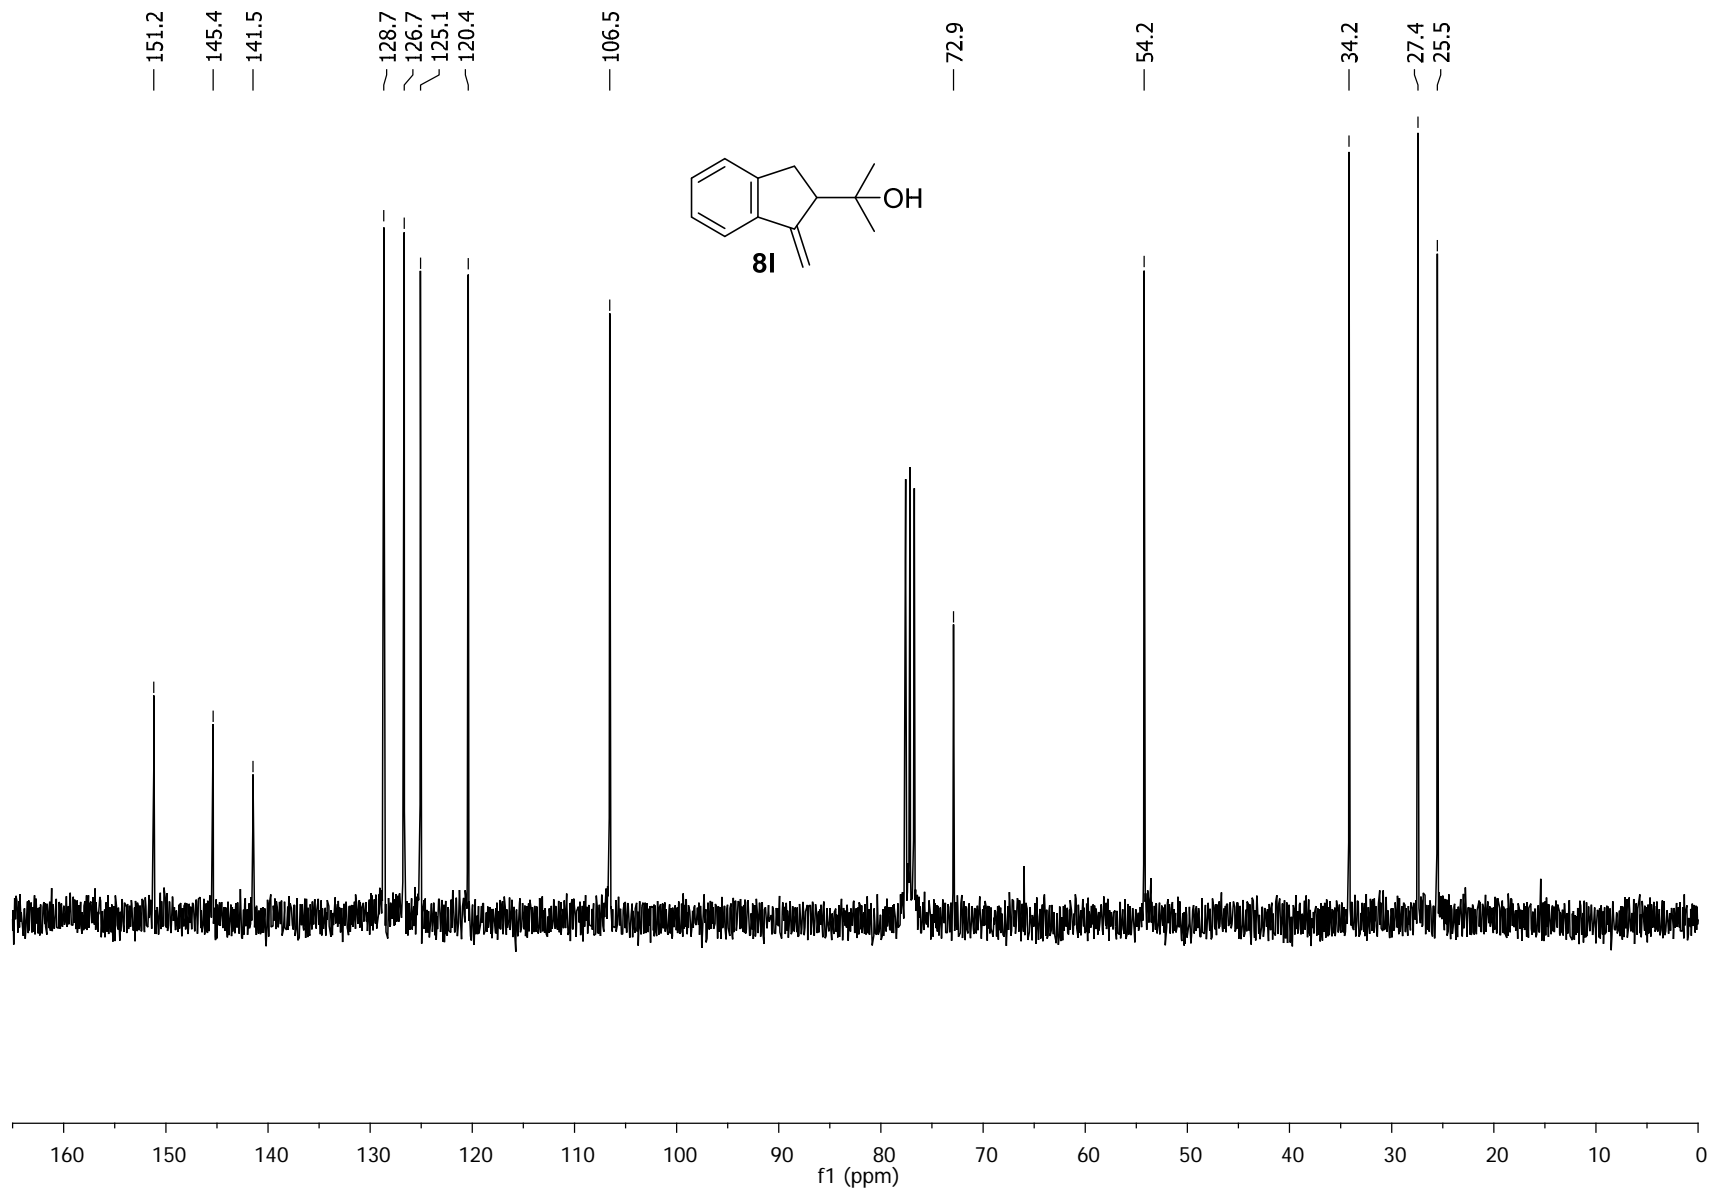

Supplement: Beilstein_J_Org_Chem-09-2242-s002.pdf [file Beilstein_J_Org_Chem-09-2242-s002.pdf]
